# Supplementary material
Source: PubMed Central journal article supplement (PMC4562282)

# Direct Asymmetric Amination of $\alpha$ -Branched Cyclic Ketones Catalyzed by a Chiral Phosphoric Acid

Xiaoyu Yang and F. Dean Toste\*

Department of Chemistry, University of California, Berkeley, California 94720, United States.

## Table of Contents

|                                               |     |
|-----------------------------------------------|-----|
| General information                           | S2  |
| Synthesis of chiral phosphoric acid catalysts | S3  |
| Synthesis of substrates                       | S5  |
| Synthesis of products                         | S8  |
| Kinetic resolution procedure                  | S23 |
| Transformation of products                    | S24 |
| Asymmetric Mannich reaction example           | S26 |
| References                                    | S28 |
| X ray structure of <b>2v</b>                  | S29 |
| HPLC traces                                   | S43 |
| NMR spectra                                   | S75 |

## General Information:

Unless otherwise noted, all commercial reagents were used without further purification. 5 Å MS were dried in oven at 200 °C overnight and used when after cooling to rt. Dichloromethane, toluene, ether, THF and triethylamine were purified by passage through an activated alumina column under argon. Thin-layer chromatography (TLC) analysis of reaction mixtures was performed using Merck silica gel 60 F254 TLC plates, and visualized under UV or by staining with ceric ammonium molybdate or potassium permanganate. Flash column chromatography was carried out on Merck Silica Gel 60 Å, 230 X 400 mesh. Nuclear magnetic resonance (NMR) spectra were recorded using Bruker AV-600, DRX-500, AV-500, AVQ-400, AVB-400 and AV-300 spectrometers. <sup>1</sup>H and <sup>13</sup>C chemical shifts are reported in ppm downfield of tetramethylsilane and referenced to residual solvent peak (CHCl<sub>3</sub>; δH = 7.26 and δC = 77.16, CH<sub>3</sub>OH; δH = 3.31 and δC = 49.00). Multiplicities are reported using the following abbreviations: s = singlet, d = doublet, t = triplet, q = quartet, m = multiplet, br = broad resonance. Mass spectral data were obtained from the Micro-Mass/Analytical Facility operated by the College of Chemistry, University of California, Berkeley. Enantiomeric excesses were determined on a Shimadzu VP Series Chiral HPLC using IA, IB, IC, OD, ASH columns. The synthesis of phosphoric acids (*S*)-**TRIP**<sup>1</sup>, (*R*)-**TCYP**<sup>2</sup> has been previously described. Racemic products were synthesized by carrying out the amination reactions using ( $\pm$ )-**TRIP** as catalyst.

## Synthesis of the chiral phosphoric acids:

(*R*)-6,6'-dioctyl-3,3'-bis(2,4,6-tricyclohexylphenyl)-[1,1'-binaphthalene]-2,2'-diol (**S2**)

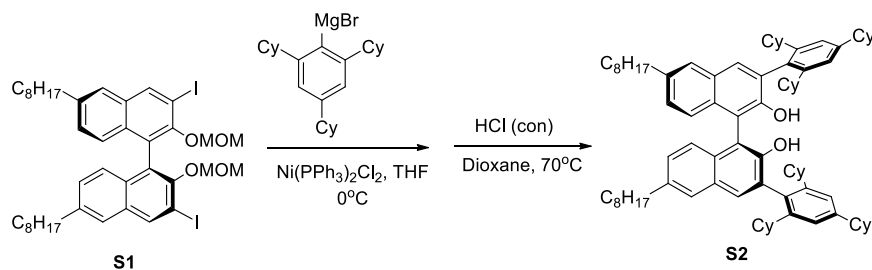

**S1**<sup>3</sup> and (2,4,6-tricyclohexylphenyl)magnesium bromide<sup>2</sup> were prepared according previous reports. Into a flame dried 250 mL flask, equipped with a stir bar was added (*R*)-**S1** (2.0g, 2.35 mmol) and NiCl<sub>2</sub>(PPh<sub>3</sub>)<sub>2</sub> (154 mg, 0.24 mmol) and THF 20 mL. The heterogeneous mixture was purged with N<sub>2</sub> and the above Grignard solution added slowly at 0 °C. The resulting mixture was warmed to rt and stirred overnight, after which the mixture was quenched with satd. NH<sub>4</sub>Cl solution. After extraction with Et<sub>2</sub>O three times, the combined organic layer was dried over Na<sub>2</sub>SO<sub>4</sub>, filtered and concentrated *in vacuo* to give the residue, which was purified by flash chromatography (20:1 Hexane/DCM) to afford a syrup 2.3 g.

To the solution of the above syrup in dioxane (40 mL) was added HCl (conc., 4 mL) at rt. The mixture was heated to 70 °C and stirred overnight. The mixture was then cooled to rt and concentrated *in vacuo* to afford a residue, which was diluted with DCM and washed with satd. NaHCO<sub>3</sub> solution and brine. The combined organic layer was dried over Na<sub>2</sub>SO<sub>4</sub>, filtered and concentrated *in vacuo* to give a residue, which was purified by flash chromatography (40:1 – 20:1, Hexane/DCM) to afford **S2** (2.0 g, 74% yield) as a white foam. <sup>1</sup>H NMR (500 MHz, CDCl<sub>3</sub>) δ 7.74 (s, 2H), 7.71 (s, 2H), 7.32 (d, *J* = 8.6 Hz, 2H), 7.26 (d, *J* = 8.5 Hz, 2H), 7.21 (s, 2H), 7.17 (s, 2H), 4.88 (s, 2H), 2.91 – 2.78 (m, 4H), 2.71 – 2.54 (m, 4H), 2.44 – 2.29 (m, 2H), 2.13 – 2.03 (m, 4H), 2.01 – 1.91 (m, 6H), 1.91 – 0.87 (m, 80H). <sup>13</sup>C NMR (125 MHz, CDCl<sub>3</sub>) δ 150.14, 147.92, 146.97, 146.71, 138.25, 131.72, 131.27, 130.06, 129.35, 129.20, 128.16, 126.88, 124.28, 122.39, 122.36, 112.96, 44.95, 41.96, 41.83, 36.15, 34.89, 34.68, 34.64, 34.61, 34.37, 34.05, 32.04, 31.62, 29.80, 29.67, 29.44, 27.27, 27.18, 27.10, 27.00, 26.91, 26.42, 26.21, 22.83, 14.27. *m/z* HRMS (ESI) found [M+H]<sup>+</sup> 1153.8767, C<sub>84</sub>H<sub>113</sub>O<sub>2</sub><sup>+</sup> requires 1153.746.

### (R)-C<sub>8</sub>-TCYP

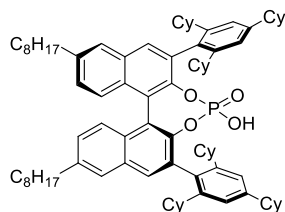

To a solution of **S2** (2.0 g, 1.73 mmol) in anhydrous pyridine (7 mL) was added POCl<sub>3</sub> (473 uL, 5.20 mmol) at rt. The mixture was warmed to 90 °C and stirred overnight, after which the mixture was cooled to rt and added to H<sub>2</sub>O (7 mL) slowly. The mixture was then warmed to 105 °C for 4 h, after which it was cooled to rt and acidified with 3N HCl solution. The mixture was extracted with DCM three times, and the combined organic layer was dried over Na<sub>2</sub>SO<sub>4</sub>, filtered and concentrated *in vacuo* to give a residue, which was purified by flash chromatography (20:1 – 2:1, Hexane/ Ethyl Acetate) to afford a white foam, which was diluted in Et<sub>2</sub>O, washed with 3N HCl solution and concentrated *in vacuo* to give (**R**)-C<sub>8</sub>-TCYP (1.5 g, 71% yield) as white a foam. <sup>1</sup>H NMR (400 MHz, CDCl<sub>3</sub>) δ 7.59 (d, *J* = 15.9 Hz, 4H), 7.20 – 7.07 (m, 4H), 6.89 (d, *J* = 8.3 Hz, 4H), 2.75 (td, *J* = 7.1, 3.9 Hz, 4H), 2.50 – 2.36 (m, 2H), 2.23 – 2.03 (m, 4H), 1.96 – 1.82 (m, 10H), 1.80 – 0.49 (m, 80H). <sup>13</sup>C NMR (125 MHz, CDCl<sub>3</sub>) δ 146.88, 146.67, 146.28, 145.84, 145.77, 140.03, 132.05, 132.00, 131.20, 130.65, 127.71, 126.75, 126.45, 122.38, 121.74, 121.56, 44.85, 42.19, 41.86, 37.16, 36.05, 35.15, 34.79, 34.25, 33.28, 32.70, 32.06, 31.42, 29.72, 29.57, 29.46, 27.44, 27.29, 27.26, 27.06, 26.84, 26.50, 26.41, 26.03, 22.84, 14.27. <sup>31</sup>P NMR (162 MHz, CDCl<sub>3</sub>) δ 1.35. *m/z* HRMS (ESI) found [M-H]<sup>-</sup> 1215.8308, C<sub>84</sub>H<sub>112</sub>O<sub>4</sub>P<sup>-</sup> requires 1215.8304.

### (R)-H<sub>8</sub>-TCYP

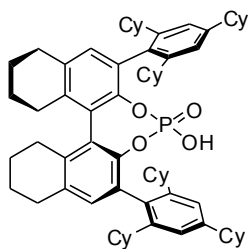

(R)-H<sub>8</sub>-TCYP was prepared from (*R*)-3,3'-diiodo-2,2'-bis(methoxymethoxy)-4a,5,5',6,6',7,7',8,8a,8'-decahydro-1,1'-binaphthalene<sup>4</sup> as the above procedures. <sup>1</sup>H NMR (500

MHz, CDCl<sub>3</sub>)  $\delta$  6.89 – 6.81 (m, 6H), 2.89 – 2.78 (m, 2H), 2.72 (tt,  $J = 13.2, 6.1$  Hz, 4H), 2.50 – 2.38 (m, 2H), 2.31 (dd,  $J = 16.8, 6.1$  Hz, 2H), 2.16 (t,  $J = 12.1$  Hz, 4H), 2.00 – 1.68 (m, 20H), 1.69 – 1.55 (m, 12H), 1.51 – 1.36 (m, 12H), 1.33 – 1.07 (m, 16H), 1.07 – 0.83 (m, 8H). <sup>13</sup>C NMR (125 MHz, CDCl<sub>3</sub>)  $\delta$  146.52, 146.46, 145.81, 144.91, 144.84, 136.10, 133.27, 132.31, 129.45, 129.42, 126.75, 122.37, 121.44, 44.80, 41.94, 41.80, 37.21, 34.96, 34.85, 34.18, 33.67, 32.77, 29.13, 27.98, 27.53, 27.30, 27.26, 27.01, 26.83, 26.58, 26.52, 23.10, 22.97. <sup>31</sup>P NMR (162 MHz, CDCl<sub>3</sub>)  $\delta$  -1.58. m/z HRMS (ESI) found [M-H]<sup>-</sup> 999.6391, C<sub>68</sub>H<sub>88</sub>O<sub>4</sub>P<sup>-</sup> requires 999.6426.

### Synthesis of the substrates:

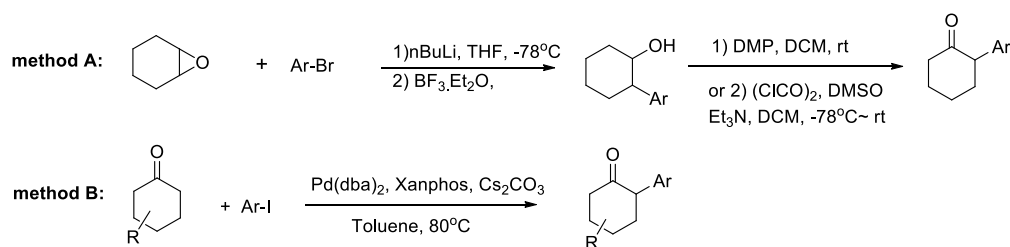

Substrates **1a**, **1s** were commercial available. Synthesis of substrate **1b**<sup>5</sup>, **1c**<sup>5</sup>, **1e**<sup>5</sup>, **1d**<sup>6</sup>, **1f**<sup>5</sup>, **1l**<sup>5</sup> and **1m**<sup>5</sup> was reported previous.

Substrate **1g**<sup>7</sup>, **1i**<sup>8</sup>, **1k**<sup>8</sup>, **1x**<sup>9</sup> was synthesized in **method A**, whose <sup>1</sup>H NMR data matched the literature.

General procedure for **method A**: To a solution of ArBr or ArI (10 mmol) in THF was added *n*BuLi (4 mL, 2.5 N in heaxane, 10 mmol) at -78 °C. After stirring for 1h at this temperature, cyclohexene oxide (5 mmol) was added followed by adding BF<sub>3</sub>.Et<sub>2</sub>O (7.5 mmol). The reaction was quenched with satd. NaHCO<sub>3</sub> solution after stirring for another 3h at -78 °C. The mixture was diluted with ethyl acetate and washed with 2N NaOH solution and brine. The combined organic layer was dried over Na<sub>2</sub>SO<sub>4</sub>, filtered and concentrated *in vacuo* to give a residue, which was purified by flash chromatography to afford the alcohol.

To the solution of alcohol (1.0 equiv.) in DCM was added DMP (1.2 equiv). After TLC monitoring the full conversion of the SM, the mixture was quenched with satd. NaHCO<sub>3</sub> solution and Na<sub>2</sub>SO<sub>3</sub> solution. The mixture was extracted with DCM for three times, the combined organic layer was dried over Na<sub>2</sub>SO<sub>4</sub>, filtered and concentrated *in vacuo* to give a residue, which was purified by flash chromatography to afford the desired ketone.

**1h**, **1j**<sup>10</sup> was synthesized in **method B**.

General procedure for **method B**: To a flame dried flask was added  $\text{Cs}_2\text{CO}_3$  (6.5 g, 20 mmol),  $\text{Pd}_2(\text{dba})_3$  (184 mg, 0.2 mmol) and Xantphos (139 mmol, 0.24 mmol). After purging with  $\text{N}_2$ , toluene (10 mL), ketone (15 mmol) and phenyl iodide (1.11 mL, 10 mmol) were added. After stirring overnight at 80 °C, the mixture was filtered and concentrated *in vacuo* to afford a residue, which was purified by flash chromatography to provide the desired ketone.

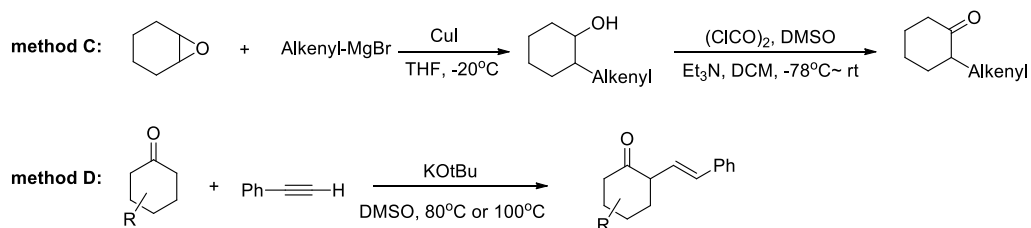

Substrate **1o**<sup>11</sup>, **1p**<sup>12</sup> was synthesized in **method C**<sup>11</sup>.

General procedure for **method C**: To a solution of CuI (190 mg, 1.0 mmol) in THF (10 mL) was added alkenyl magnesium bromide (13 mL, 1.0 N in THF, 13 mmol) at -78°C. After stirring for 30 min, cyclohexene oxide (1.0 mL, 10 mmol) was added and the mixture was warmed to -20°C. After stirring for another 2 h at this temperature, the mixture was quenched with satd.  $\text{NH}_4\text{Cl}$  solution and extracted with  $\text{Et}_2\text{O}$  for 3 times. The combined organic layer was dried over  $\text{Na}_2\text{SO}_4$ , filtered and concentrated *in vacuo* to give a residue, which was purified by flash chromatography to afford the alcohol.

To the solution of  $(\text{ClCO})_2$  (889  $\mu\text{L}$ , 10.5 mmol) in DCM (20 mL) was added DMSO (1.5 mL, 21.0 mmol) at -78 °C. After stirring for 0.5 h, a solution of the above alcohol (7.0 mmol) was added slowly into the mixture. After stirring for another 2h at -78 °C,  $\text{Et}_3\text{N}$  (5.8 mL, 42.0 mmol) was added and the mixture was slowly warmed to rt. The mixture was quenched with satd.  $\text{NH}_4\text{Cl}$  solution after stirring for another 1h stirring. The mixture was extracted with DCM three times, and the combined organic layer was washed with brine, dried over  $\text{Na}_2\text{SO}_4$ , filtered and concentrated *in vacuo* to give a residue, which was purified by flash chromatography to afford desired ketone.

Substrates **1n**<sup>13</sup>, **1t**, **1u**, **1v**<sup>14</sup>, **1w**<sup>14</sup> was synthesized in **method D**<sup>13-14</sup>.

General procedure for **method D**: To a solution of cyclic ketone (10 mmol) in DMSO (20 mL) was added phenylacetylene (1.1 mL, 10 mmol) and *t*BuOK (1.1 g, 10 mmol) at 80 °C or 100 °C.

After stirring of 45 mins after this temperature, the mixture was poured into a mixture of ice and satd.  $\text{NH}_4\text{Cl}$  solution. Upon extraction with  $\text{Et}_2\text{O}$  three times, the combined organic layer was washed with  $\text{H}_2\text{O}$ , brine, dried over  $\text{Na}_2\text{SO}_4$ , filtered and concentrated *in vacuo* to give a residue, which was purified by flash chromatography to afford desired ketone.

Data for the new compounds was given below:

*tert*-butyl 4-(2-oxocyclohexyl)benzoate (**1h**)

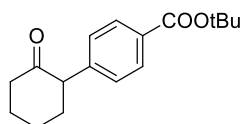

$^1\text{H}$  NMR (400 MHz,  $\text{CDCl}_3$ )  $\delta$  7.96 (d,  $J = 8.2$  Hz, 2H), 7.18 (d,  $J = 8.3$  Hz, 2H), 3.66 (dd,  $J = 12.2, 5.4$  Hz, 1H), 2.63 – 2.40 (m, 2H), 2.27 (ddd,  $J = 12.2, 6.0, 3.6$  Hz, 1H), 2.22 – 2.12 (m, 1H), 2.10 – 1.96 (m, 2H), 1.90 – 1.78 (m, 2H), 1.58 (s, 9H).  $^{13}\text{C}$  NMR (125 MHz,  $\text{CDCl}_3$ )  $\delta$  209.76, 165.78, 143.57, 130.77, 129.59, 128.59, 80.92, 57.51, 42.34, 35.14, 28.32, 27.88, 25.43.  $m/z$  HRMS (ESI) found  $[\text{M}+\text{Na}]^+$  297.1465,  $\text{C}_{17}\text{H}_{22}\text{O}_3\text{Na}^+$  requires 297.1461.

(*Z*)-2-styrylcyclohexanone (**1q**)

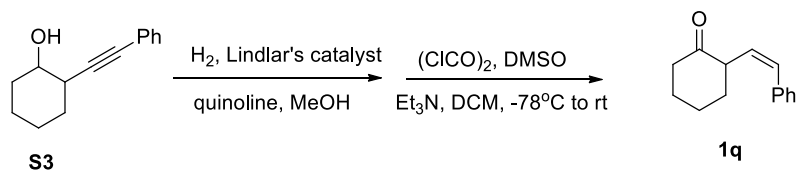

To a solution of **S3** (500 mg, 2.5 mmol) in  $\text{MeOH}$  (8 mL) was added Lindlar's catalyst (200 mg) and quinolone (1.2  $\mu\text{L}$ ). After purging with  $\text{H}_2$ , the mixture was stirred at rt for 2h. The mixture was filtered and concentrated *in vacuo* to afford a residue, which was purified by flash chromatography (4: 1,  $\text{DCM}/\text{Hexane}$ ) to afford the alkene-substituted alcohol (302 mg, 60% yield). The Swern Oxidation was carried out following the procedure in **Method C** to afford the desired ketone **1q**.  $^1\text{H}$  NMR (400 MHz,  $\text{CDCl}_3$ )  $\delta$  7.33 (dd,  $J = 8.2, 6.7$  Hz, 2H), 7.25 (d,  $J = 5.5$  Hz, 1H), 7.19 (d,  $J = 7.1$  Hz, 2H), 6.64 (d,  $J = 11.7$  Hz, 1H), 5.78 (dd,  $J = 11.7, 9.7$  Hz, 1H), 3.50 (td,  $J = 10.1, 5.4$  Hz, 1H), 2.52 – 2.42 (m, 1H), 2.31 (td,  $J = 12.7, 6.1$  Hz, 1H), 2.19 – 2.03 (m, 2H), 1.93 – 1.86 (m, 1H), 1.80 – 1.62 (m, 3H).  $^{13}\text{C}$  NMR (100 MHz,  $\text{CDCl}_3$ )  $\delta$  211.30, 136.95,

130.83, 129.37, 128.31, 128.26, 126.93, 50.16, 41.86, 34.98, 27.68, 24.33. m/z HRMS (EI) found  $[M]^+$  200.11991,  $C_{14}H_{16}O^+$  requires 200.1201.

(*E*)-7-styryl-1,4-dioxaspiro[4.5]decan-8-one (**1s**)

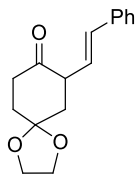

$^1H$  NMR (500 MHz,  $CDCl_3$ )  $\delta$  7.43 – 7.33 (m, 2H), 7.30 (dd,  $J = 8.7, 6.6$  Hz, 2H), 7.24 – 7.19 (m, 1H), 6.47 – 6.40 (m, 1H), 6.37 (d,  $J = 16.1$  Hz, 1H), 4.14 – 4.01 (m, 4H), 3.53 (dt,  $J = 12.8, 6.3$  Hz, 1H), 2.72 (dddd,  $J = 14.3, 13.0, 6.5, 1.2$  Hz, 1H), 2.47 (ddd,  $J = 14.4, 4.9, 3.4$  Hz, 1H), 2.21 (ddd,  $J = 13.3, 6.0, 3.2$  Hz, 1H), 2.14 – 1.98 (m, 3H).  $^{13}C$  NMR (125 MHz,  $CDCl_3$ )  $\delta$  209.64, 136.96, 131.59, 128.50, 127.47, 126.46, 126.36, 107.15, 64.87, 64.71, 50.02, 40.84, 38.16, 34.52. m/z HRMS (EI) found  $[M]^+$  258.1254,  $C_{16}H_{18}O_3^+$  requires 258.1256.

(*E*)-4,4-dimethyl-2-styrylcyclohexanone (**1t**)

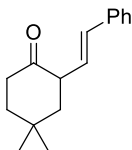

$^1H$  NMR (300 MHz,  $CDCl_3$ )  $\delta$  7.42 – 7.35 (m, 2H), 7.29 (ddd,  $J = 7.7, 6.7, 1.4$  Hz, 2H), 7.24 – 7.16 (m, 1H), 6.43 (dd,  $J = 16.1, 6.5$  Hz, 1H), 6.34 (d,  $J = 16.2$  Hz, 1H), 3.38 – 3.22 (m, 1H), 2.54 (dddd,  $J = 14.3, 13.2, 6.6, 1.0$  Hz, 1H), 2.33 (ddd,  $J = 14.4, 4.6, 3.0$  Hz, 1H), 1.87 (ddd,  $J = 13.2, 5.9, 3.1$  Hz, 1H), 1.81 – 1.63 (m, 3H), 1.28 (s, 3H), 1.06 (s, 3H).  $^{13}C$  NMR (125 MHz,  $CDCl_3$ )  $\delta$  211.69, 137.21, 131.19, 128.50, 127.68, 127.33, 126.32, 49.70, 47.12, 39.76, 38.26, 31.43, 30.79, 24.58. m/z HRMS (EI) found  $[M]^+$  228.1514,  $C_{16}H_{20}O^+$  requires 228.1514.

## Synthesis of Products

General procedure for asymmetric amination:

To the substrate **1** (0.30 mmol) in a 1 dram (15 x 45 mm) vial equipped with an 8 mm magnetic stirrer bar was added DCM (0.3 ml). Subsequently, *di*-tert-butyl azodicarboxylates (90 mg, 0.39



mmol), 5Å MS (50 mg), and (**R**)-**C<sub>8</sub>-TCYP** (36 mg, 0.03 mmol or 18 mg, 0.015 mmol) were added. After all the reagents were dissolved, the mixture was warmed to 45 °C with the cap open. After about 2h, the DCM was evaporated, leaving the mixture as syrup. After heated at 45 °C for another 40h or 60h, the mixture was cooled to rt and directly purified by flash column chromatography to afford the desired product.

The relevant racemic products were synthesized in the same procedure except (**±**)-**TRIP** (10 mol%) was used as catalyst.

(*S*)-di-*tert*-butyl 1-(2-oxo-1-phenylcyclohexyl)hydrazine-1,2-dicarboxylate (**2a**)

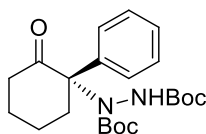

The reaction was carried out according the general procedure using **1a** (52 mg, 0.3 mmol) and (**R**)-**C<sub>8</sub>-TCYP** (36 mg, 0.03 mmol). After stirring at 45 °C for 60 h, the mixture was purified by flash column chromatography (7: 1, Hexane/ethyl acetate) to afford the title product **2a** (117 mg, 97% yield). <sup>1</sup>H NMR (400 MHz, CDCl<sub>3</sub>) δ 7.44 – 7.08 (m, 5H), 6.63 – 5.66 (m, 1H), 3.06 – 2.90 (m, 1H), 2.85 – 2.73 (m, 1H), 2.49 – 2.28 (m, 2H), 2.22 – 2.09 (m, 1H), 2.09 – 1.97 (m, 1H), 1.86 – 1.69 (m, 1H), 1.66 – 1.24 (m, 19H). <sup>13</sup>C NMR (125 MHz, CDCl<sub>3</sub>) δ 205.95, 155.55, 155.06, 151.03, 137.07, 128.44, 127.95, 127.78, 127.62, 83.63, 81.60, 80.98, 40.53, 28.13, 28.06, 27.93, 21.54. m/z HRMS (ESI) found [M+Na]<sup>+</sup> 427.2205, C<sub>22</sub>H<sub>32</sub>N<sub>2</sub>O<sub>5</sub>Na<sup>+</sup> requires 427.2203. [α]<sub>D</sub><sup>20</sup> = +5.1 (c 1.0, CHCl<sub>3</sub>). HPLC (Chiralpak OD column, 98:2 hexanes/isopropanol, 0.5 ml/min; tr= 17.0 min (minor), 18.2 min (major); 99% ee.

(*S*)-di-*tert*-butyl 1-(2-oxo-1-(*p*-tolyl)cyclohexyl)hydrazine-1,2-dicarboxylate (**2b**)

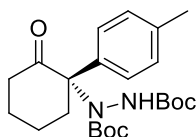

The reaction was carried out according the general procedure using **1b** (56 mg, 0.3 mmol) and (**R**)-**C<sub>8</sub>-TCYP** (36 mg, 0.03 mmol). After stirring at 45°C for 60 h, the mixture was purified by flash column chromatography (7: 1, Hexane/ EA) to afford the title product **2b** (122 mg, 97%

yield).  $^1\text{H}$  NMR (400 MHz,  $\text{CDCl}_3$ )  $\delta$  7.18 – 7.04 (m, 4H), 6.59 – 5.63 (m, 1H), 3.08 – 2.66 (m, 2H), 2.46 – 2.32 (m, 2H), 2.31 (d,  $J$  = 4.8 Hz, 3H), 2.22 – 1.94 (m, 2H), 1.86 – 1.67 (m, 1H), 1.63 – 1.52 (m, 1H), 1.55 – 1.28 (m, 18H).  $^{13}\text{C}$  NMR (125 MHz,  $\text{CDCl}_3$ )  $\delta$  206.11, 155.62, 155.10, 137.75, 134.06, 129.34, 129.23, 128.58, 127.58, 81.55, 80.97, 40.58, 40.26, 28.18, 28.12, 27.98, 21.63, 21.03.  $m/z$  HRMS (ESI) found  $[\text{M}+\text{Na}]^+$  441.2368,  $\text{C}_{23}\text{H}_{34}\text{N}_2\text{O}_5\text{Na}^+$  requires 441.2360.  $[\alpha]_{\text{D}}^{20} = +6.5$  (c 1.0,  $\text{CHCl}_3$ ). HPLC (Chiralpak IC column, 92:8 hexanes/ isopropanol, 1 ml/min;  $t_{\text{r}} = 11.9$  min (minor), 13.1 min (major); 99% ee.

(*S*)-di-*tert*-butyl 1-(1-(naphthalen-2-yl)-2-oxocyclohexyl)hydrazine-1,2-dicarboxylate (**2c**)

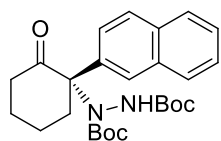

The reaction was carried out according the general procedure using **1c** (67 mg, 0.3 mmol) and (*R*)-**C<sub>8</sub>-TCYP** (36 mg, 0.03 mmol). After stirring at 45 °C for 60h, the mixture was purified by flash column chromatography (8: 1, Hexane/ EA) to afford the title product **2c** (122 mg, 90% yield).  $^1\text{H}$  NMR (600 MHz,  $\text{CDCl}_3$ )  $\delta$  7.86 – 7.74 (m, 3H), 7.71 – 7.60 (m, 1H), 7.53 – 7.42 (m, 3H), 6.63 – 5.71 (m, 1H), 3.13 – 2.70 (m, 2H), 2.66 – 2.36 (m, 2H), 2.28 – 2.15 (m, 1H), 2.12 – 2.05 (m, 1H), 1.91 – 1.72 (m, 1H), 1.71 – 1.60 (m, 1H), 1.51 – 1.35 (m, 18H).  $^{13}\text{C}$  NMR (125 MHz,  $\text{CDCl}_3$ )  $\delta$  206.12, 155.61, 155.17, 134.88, 133.03, 132.84, 128.35, 128.11, 127.41, 126.54, 126.16, 125.98, 81.07, 40.73, 28.19, 28.11, 27.96, 21.69.  $m/z$  HRMS (ESI) found  $[\text{M}+\text{Na}]^+$  477.2362,  $\text{C}_{26}\text{H}_{34}\text{N}_2\text{O}_5\text{Na}^+$  requires 477.2360. HPLC (Chiralpak OD column, 98:2 hexanes/ isopropanol, 0.5 ml/min;  $t_{\text{r}} = 17.9$  min (major), 20.3 min (minor); 97% ee.

(*S*)-di-*tert*-butyl 1-(1-(benzo[d][1,3]dioxol-5-yl)-2-oxocyclohexyl)hydrazine-1,2-dicarboxylate (**2d**)

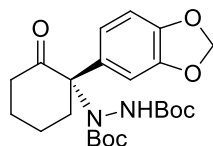

The reaction was carried out according the general procedure using **1d** (65 mg, 0.3 mmol) and (*R*)-**C<sub>8</sub>-TCYP** (36 mg, 0.03 mmol). After stirring at 45 °C for 40h, the mixture was purified by

flash column chromatography (5: 1, Hexane/ EA) to afford the title product **2d** (108 mg, 80% yield).  $^1\text{H}$  NMR (500 MHz,  $\text{CDCl}_3$ )  $\delta$  6.85 – 6.76 (m, 1H), 6.76 – 6.65 (m, 2H), 6.00 – 5.63 (m, 3H), 3.05 – 2.69 (m, 2H), 2.43 – 2.22 (m, 2H), 2.17 – 1.92 (m, 2H), 1.79 – 1.66 (m, 1H), 1.66 – 1.52 (m, 1H), 1.54 – 1.32 (m, 18H).  $^{13}\text{C}$  NMR (125 MHz,  $\text{CDCl}_3$ )  $\delta$  205.95, 155.47, 155.13, 148.00, 147.34, 130.92, 130.26, 121.05, 108.69, 107.94, 101.30, 101.02, 81.07, 40.63, 28.20, 28.14, 27.85, 21.70.  $m/z$  HRMS (ESI) found  $[\text{M}+\text{Na}]^+$  471.2100,  $\text{C}_{23}\text{H}_{32}\text{N}_2\text{O}_7\text{Na}^+$  requires 471.2102.  $[\alpha]_{\text{D}}^{20} = +12.5$  (c 1.0,  $\text{CHCl}_3$ ). HPLC (Chiralpak IC column, 85:15 hexanes/ isopropanol, 1 ml/min;  $t_{\text{r}} = 10.9$  min (minor), 17.2 min (major); 98% ee.

(*S*)-di-*tert*-butyl 1-(1-(3-methoxyphenyl)-2-oxocyclohexyl)hydrazine-1,2-dicarboxylate (**2e**)

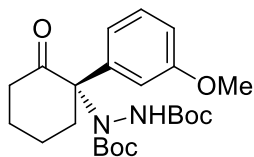

The reaction was carried out according the general procedure using **1e** (61 mg, 0.3 mmol) and (*R*)-**C<sub>8</sub>-TCYP** (36 mg, 0.03 mmol). After stirring at 45 °C for 60h, the mixture was purified by flash column chromatography (6: 1, Hexane/ EA) to afford the title product **2e** (114 mg, 88% yield).  $^1\text{H}$  NMR (500 MHz,  $\text{CDCl}_3$ )  $\delta$  7.26 – 7.19 (m, 1H), 6.88 – 6.75 (m, 3H), 6.42 – 5.63 (m, 1H), 3.75 (s, 3H), 3.09 – 2.70 (m, 2H), 2.49 – 2.27 (m, 2H), 2.25 – 1.95 (m, 2H), 1.82 – 1.69 (m, 1H), 1.62 – 1.53 (m, 1H), 1.48 – 1.35 (m, 18H).  $^{13}\text{C}$  NMR (125 MHz,  $\text{CDCl}_3$ )  $\delta$  205.91, 159.69, 159.14, 155.64, 155.10, 138.90, 129.50, 129.39, 120.72, 119.94, 114.07, 113.84, 113.34, 81.06, 75.25, 55.26, 40.70, 36.69, 28.18, 28.12, 21.61.  $m/z$  HRMS (ESI) found  $[\text{M}+\text{Na}]^+$  457.2310,  $\text{C}_{23}\text{H}_{34}\text{N}_2\text{O}_6\text{Na}^+$  requires 457.2309.  $[\alpha]_{\text{D}}^{20} = +5.3$  (c 1.0,  $\text{CHCl}_3$ ). HPLC (Chiralpak IA column, 90:10 hexanes/ isopropanol, 1 ml/min;  $t_{\text{r}} = 10.1$  min (minor), 13.1 min (major); 99% ee.

(*S*)-di-*tert*-butyl 1-(1-(4-bromophenyl)-2-oxocyclohexyl)hydrazine-1,2-dicarboxylate (**2f**)

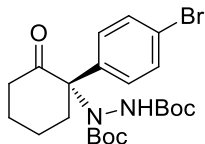

The reaction was carried out according the general procedure using **1f** (76 mg, 0.3 mmol) and (*R*)-**C<sub>8</sub>-TCYP** (36 mg, 0.03 mmol). After stirring at 45 °C for 60h, the mixture was purified by

flash column chromatography (8: 1, Hexane/ethyl acetate) to afford the title product **2f** (136 mg, 80% yield).  $^1\text{H}$  NMR (400 MHz,  $\text{CDCl}_3$ )  $\delta$  7.44 (d,  $J$  = 8.6 Hz, 2H), 7.18 – 7.09 (m, 2H), 6.66 – 5.75 (m, 1H), 3.10 – 2.93 (m, 1H), 2.89 – 2.58 (m, 1H), 2.48 – 2.33 (m, 1H), 2.32 – 1.94 (m, 3H), 1.86 – 1.68 (m, 1H), 1.57 – 1.26 (m, 19H).  $^{13}\text{C}$  NMR (125 MHz,  $\text{CDCl}_3$ )  $\delta$  205.70, 155.56, 155.16, 136.63, 131.54, 130.81, 129.51, 125.30, 122.27, 81.36, 40.48, 28.19, 28.09, 27.99, 21.38.  $m/z$  HRMS (ESI) found  $[\text{M}+\text{Na}]^+$  505.1313,  $\text{C}_{22}\text{H}_{31}\text{N}_2\text{O}_5\text{BrNa}^+$  requires 505.1309.  $[\alpha]_{\text{D}}^{20} = +0.4$  (c 1.0,  $\text{CHCl}_3$ ). HPLC (Chiralpak IC column, 93:7 hexanes/ isopropanol, 1 ml/min;  $t_{\text{r}} = 9.0$  min (minor), 16.0 min (major); 98% ee.

(*S*)-di-*tert*-butyl 1-(2-oxo-1-(4-(trifluoromethyl)phenyl)cyclohexyl)hydrazine-1,2-dicarboxylate (**2g**)

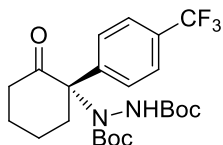

The reaction was carried out according the general procedure using **1g** (72 mg, 0.3 mmol) and (*R*)-**C<sub>8</sub>-TCYP** (36 mg, 0.03 mmol). After stirring at 45 °C for 60h, the mixture was purified by flash column chromatography (8: 1, Hexane/ EA) to afford the title product **2g** (101 mg, 71% yield).  $^1\text{H}$  NMR (600 MHz,  $\text{CDCl}_3$ )  $\delta$  7.72 – 7.51 (m, 2H), 7.44 – 7.30 (m, 2H), 6.64 – 5.69 (m, 1H), 3.17 – 2.95 (m, 1H), 2.92 – 2.67 (m, 1H), 2.61 – 2.36 (m, 1H), 2.32 – 2.15 (m, 1H), 2.15 – 2.05 (m, 1H), 1.87 – 1.71 (m, 1H), 1.64 – 1.55 (m, 1H), 1.52 – 1.34 (m, 18H).  $^{13}\text{C}$  NMR (125 MHz,  $\text{CDCl}_3$ )  $\delta$  205.71, 155.70, 155.21, 141.90, 130.07 (q,  $J$  = 32.6 Hz), 129.09, 128.11, 125.32 (q,  $J$  = 3.7 Hz), 125.14, 124.62 (q,  $J$  = 2.9 Hz), 122.98, 81.57, 40.48, 28.65, 28.20, 28.09, 28.00, 21.22.  $m/z$  HRMS (ESI) found  $[\text{M}+\text{Na}]^+$  495.2078,  $\text{C}_{23}\text{H}_{31}\text{F}_3\text{N}_2\text{O}_5\text{Na}^+$  requires 495.2077.  $[\alpha]_{\text{D}}^{20} = -3.4$  (c 0.5,  $\text{CHCl}_3$ ). HPLC (Chiralpak IC column, 93:7 hexanes/ isopropanol, 1 ml/min;  $t_{\text{r}} = 6.7$  min (minor), 10.6 min (major); 98% ee.

(*S*)-di-*tert*-butyl 1-(1-(4-(tert-butoxycarbonyl)phenyl)-2-oxocyclohexyl)hydrazine-1,2-dicarboxylate (**2h**)

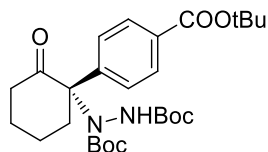

The reaction was carried out according the general procedure using **1h** (82 mg, 0.3 mmol) and (**R**)-**C<sub>8</sub>-TCYP** (36 mg, 0.03 mmol). After stirring at 45 °C for 60h, the mixture was purified by flash column chromatography (7: 1, Hexane/ EA) to afford the title product **2h** (115 mg, 76% yield). <sup>1</sup>H NMR (600 MHz, CDCl<sub>3</sub>) δ 8.01 – 7.84 (m, 2H), 7.57 – 7.20 (m, 2H), 6.80 – 5.00 (m, 1H), 3.13 – 2.51 (m, 2H), 2.45 – 1.95 (m, 4H), 1.86 – 1.67 (m, 1H), 1.65 – 1.09 (m, 28H). <sup>13</sup>C NMR (125 MHz, CDCl<sub>3</sub>) δ 205.58, 165.65, 165.39, 155.58, 155.20, 142.11, 131.52, 129.43, 128.84, 127.52, 81.94, 81.35, 81.16, 40.49, 36.68, 28.22, 28.17, 28.07, 27.97, 21.34. m/z HRMS (ESI) found [M+Na]<sup>+</sup> 527.2728, C<sub>27</sub>H<sub>40</sub>N<sub>2</sub>O<sub>7</sub>Na<sup>+</sup> requires 527.2728. [α]<sub>D</sub><sup>20</sup> = +4.7 (c 1.0, CHCl<sub>3</sub>). HPLC (Chiralpak IC column, 85:15 hexanes/ isopropanol, 1 ml/min; tr= 8.0 min (minor), 16.8 min (major); 97% ee.

(*S*)-di-*tert*-butyl 1-(2-oxo-1-(*o*-tolyl)cyclohexyl)hydrazine-1,2-dicarboxylate (**2i**)

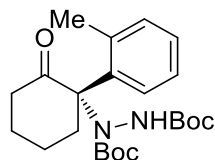

The reaction was carried out according the general procedure using **1i** (56 mg, 0.3 mmol) and (**R**)-**C<sub>8</sub>-TCYP** (36 mg, 0.03 mmol). After stirring at 45 °C for 60h, the mixture was purified by flash column chromatography (9: 1, Hexane/ethyl acetate) to afford the title product **2i** (117 mg, 73% yield). <sup>1</sup>H NMR (500 MHz, CDCl<sub>3</sub>) δ 7.20 – 7.11 (m, 3H), 7.01 (d, *J* = 7.5 Hz, 1H), 6.45 – 5.96 (m, 1H), 2.99 – 2.57 (m, 3H), 2.44 – 2.32 (m, 1H), 2.57 – 2.22 (m, 3H), 2.11 – 1.58 (m, 4H), 1.53 – 1.31 (m, 18H). <sup>13</sup>C NMR (125 MHz, CDCl<sub>3</sub>) δ 204.87, 155.40, 155.01, 138.46, 138.27, 137.65, 137.37, 135.36, 135.18, 133.41, 132.79, 129.45, 128.02, 127.85, 127.20, 125.95, 125.88, 125.19, 82.40, 81.49, 81.28, 80.88, 78.18, 41.52, 40.84, 40.53, 35.97, 35.90, 35.74, 28.29, 28.13, 27.76, 26.83, 23.05, 22.18, 21.68. m/z HRMS (ESI) found [M+Na]<sup>+</sup> 441.2358, C<sub>23</sub>H<sub>34</sub>N<sub>2</sub>O<sub>5</sub>Na<sup>+</sup> requires 441.2360. [α]<sub>D</sub><sup>20</sup> = +57.3 (c 1.0, CHCl<sub>3</sub>). HPLC (Chiralpak OD column, 98:2 hexanes/ isopropanol, 1 ml/min; tr = 7.6 min (major), 8.6 min (minor); 99% ee.

(*S*)-di-*tert*-butyl 1-(1-(2-chlorophenyl)-2-oxocyclohexyl)hydrazine-1,2-dicarboxylate (**2j**)

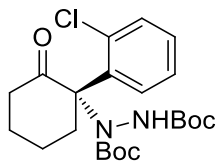

The reaction was carried out according the general procedure using **1j** (62 mg, 0.3 mmol) and (*R*)-**C<sub>8</sub>-TCYP** (36 mg, 0.03 mmol). After stirring at 45 °C for 60h, the mixture was purified by flash column chromatography (9: 1, Hexane/ethyl acetate) to afford the title product **2j** (98 mg, 78% yield). <sup>1</sup>H NMR (500 MHz, CDCl<sub>3</sub>) δ 7.44 – 7.34 (m, 1H), 7.33 – 7.11 (m, 3H), 6.67 – 6.24 (m, 1H), 3.40 – 2.74 (m, 2H), 2.71 – 2.58 (m, 1H), 2.58 – 2.44 (m, 1H), 2.11 – 1.83 (m, 3H), 1.66 – 1.53 (m, 1H), 1.62 – 1.38 (m, 18H). <sup>13</sup>C NMR (125 MHz, CDCl<sub>3</sub>) δ 204.20, 155.16, 154.92, 151.07, 135.75, 134.44, 132.34, 131.63, 129.11, 128.91, 128.73, 126.81, 100.04, 83.72, 81.60, 81.10, 77.67, 77.55, 40.84, 40.41, 40.15, 36.59, 36.40, 28.37, 28.25, 28.16, 28.06, 27.97, 27.93, 26.89, 21.55. m/z HRMS (ESI) found [M+Na]<sup>+</sup> 461.1813, C<sub>22</sub>H<sub>31</sub>ClN<sub>2</sub>O<sub>5</sub>Na<sup>+</sup> requires 461.1814. [α]<sub>D</sub><sup>20</sup> = +33.2 (c 1.0, CHCl<sub>3</sub>). HPLC (Chiralpak OD column, 98:2 hexanes/isopropanol, 1 ml/min; tr= 9.8 min (minor), 10.8 min (major); 99% ee.

(*S*)-di-*tert*-butyl 1-(2-oxo-1-phenylcyclopentyl)hydrazine-1,2-dicarboxylate (**2k**)

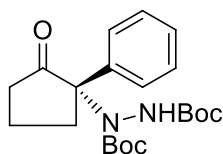

The reaction was carried out according the general procedure using **1k** (48 mg, 0.3 mmol) and (*R*)-**C<sub>8</sub>-TCYP** (36 mg, 0.03 mmol). After stirring at 45 °C for 40h, the mixture was purified by flash column chromatography (8: 1, Hexane/ EA) to afford the title product **2k** (108 mg, 78% yield). <sup>1</sup>H NMR (500 MHz, CDCl<sub>3</sub>) δ 7.58 – 7.46 (m, 2H), 7.38 – 7.31 (m, 2H), 7.31 – 7.27 (m, 1H), 6.12 – 5.18 (m, 1H), 3.00 – 2.72 (m, 2H), 2.70 – 2.53 (m, 1H), 2.17 (dd, *J* = 19.0, 8.5 Hz, 1H), 2.11 – 2.02 (m, 1H), 1.72 – 1.57 (m, 1H), 1.48 – 1.28 (m, 18H). <sup>13</sup>C NMR (125 MHz, CDCl<sub>3</sub>) δ 211.82, 211.29, 155.00, 154.77, 154.57, 154.23, 154.06, 133.92, 133.14, 128.94, 128.71, 128.48, 128.40, 128.33, 128.29, 83.76, 82.13, 81.68, 80.91, 73.80, 73.55, 35.12, 34.87, 31.48, 31.18, 28.31, 28.22, 28.17, 28.13, 28.00, 18.19. m/z HRMS (ESI) found [M+Na]<sup>+</sup>

413.2050,  $C_{21}H_{30}N_2O_5Na^+$  requires 417.2047. HPLC (Chiralpak OD column, 98.5:1.5 hexanes/ isopropanol, 0.5 ml/min;  $t_r$  = 19.3 min (major), 20.7 min (minor); >95% ee.

(*R*)-di-*tert*-butyl 1-(4-oxo-3-phenyltetrahydro-2H-pyran-3-yl)hydrazine-1,2-dicarboxylate (**2l**)

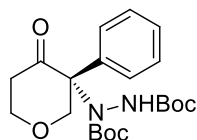

The reaction was carried out according the general procedure using **1l** (53 mg, 0.3 mmol) and (*R*)-**C<sub>8</sub>-TCYP** (36 mg, 0.03 mmol). After stirring at 45 °C for 40h, the mixture was purified by flash column chromatography (20: 1, DCM/ Et<sub>2</sub>O) to afford the title product **2l** (118 mg, 97% yield). <sup>1</sup>H NMR (500 MHz, CDCl<sub>3</sub>) δ 7.68 – 7.36 (m, 2H), 7.34 (t, *J* = 7.4 Hz, 2H), 7.30 (d, *J* = 7.2 Hz, 1H), 6.93 – 5.75 (m, 1H), 4.72 (d, *J* = 12.2 Hz, 1H), 4.60 – 4.36 (m, 1H), 4.29 – 3.84 (m, 2H), 2.91 – 2.57 (m, 1H), 2.52 – 2.35 (m, 1H), 1.48 – 1.26 (m, 18H). <sup>13</sup>C NMR (125 MHz, CDCl<sub>3</sub>) δ 200.96, 155.05, 134.58, 128.84, 128.69, 128.56, 128.42, 128.21, 128.04, 100.06, 82.25, 81.91, 81.14, 73.25, 71.45, 67.61, 67.06, 40.26, 28.20, 28.11, 28.00. *m/z* HRMS (ESI) found [M+Na]<sup>+</sup> 429.1997,  $C_{21}H_{30}N_2O_6Na^+$  requires 429.1996.  $[\alpha]_D^{20}$  = +83.0 (c 1.0, CHCl<sub>3</sub>). HPLC (Chiralpak IC column, 85:15 hexanes/ isopropanol, 1 ml/min;  $t_r$  = 5.6 min (major), 8.3 min (minor); 99% ee.

(*R*)-di-*tert*-butyl 1-(1-(*tert*-butoxycarbonyl)-4-oxo-3-phenylpiperidin-3-yl)hydrazine-1,2-dicarboxylate (**2m**)

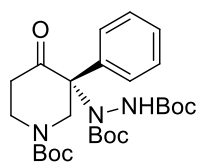

The reaction was carried out according the general procedure using **1m** (82 mg, 0.3 mmol) and (*R*)-**C<sub>8</sub>-TCYP** (36 mg, 0.03 mmol). After stirring at 45 °C for 60h, the mixture was purified by flash column chromatography (10: 1, DCM/ Et<sub>2</sub>O) to afford the title product **2m** (120 mg, 79% yield). <sup>1</sup>H NMR (500 MHz, CDCl<sub>3</sub>) δ 7.56 – 7.38 (m, 2H), 7.33 – 7.25 (m, 3H), 6.51 – 5.50 (m, 1H), 5.20 – 3.92 (m, 2H), 3.81 – 3.25 (m, 1H), 2.91 – 2.43 (m, 1H), 2.48 – 1.98 (m, 1H), 1.60 – 1.06 (m, 28H). <sup>13</sup>C NMR (125 MHz, CDCl<sub>3</sub>) δ 202.85, 155.84, 155.08, 154.00, 133.73, 129.03,

128.92, 128.80, 128.64, 128.56, 82.19, 81.70, 81.33, 80.88, 80.78, 80.41, 73.60, 48.07, 41.03, 39.20, 38.86, 28.63, 28.36, 28.21, 28.16, 28.04, 27.99, 27.77. m/z HRMS (ESI) found  $[M+Na]^+$  528.2681,  $C_{26}H_{39}N_3O_7Na^+$  requires 528.2680.  $[\alpha]_D^{20} = +38.0$  (c 1.0,  $CHCl_3$ ). HPLC (Chiralpak IC column, 85:15 hexanes/ isopropanol, 1 ml/min; tr = 6.6 min (major), 8.8 min (minor); 96% ee.

(*S,E*)-di-*tert*-butyl 1-(2-oxo-1-styrylcyclohexyl)hydrazine-1,2-dicarboxylate (**2n**)

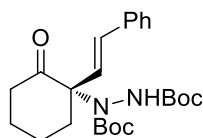

The reaction was carried out according the general procedure using **1n** (60 mg, 0.3 mmol) and (*R*)-**C<sub>8</sub>**-TCYP (18 mg, 0.015 mmol). After stirring at 45 °C for 60h, the mixture was purified by flash column chromatography (10: 1, Hexane/ethyl acetate) to afford the title product **2n** (128 mg, 99% yield). <sup>1</sup>H NMR (400 MHz,  $CDCl_3$ )  $\delta$  7.42 – 7.34 (m, 2H), 7.30 (t,  $J = 7.7$  Hz, 2H), 7.26 – 7.19 (m, 1H), 6.51 – 6.25 (m, 2H), 6.24 – 6.05 (m, 1H), 3.14 – 2.80 (m, 1H), 2.64 (dt,  $J = 14.4, 4.6$  Hz, 1H), 2.37 (dt,  $J = 12.5, 5.0$  Hz, 1H), 2.20 – 2.00 (m, 2H), 1.99 – 1.84 (m, 1H), 1.82 – 1.67 (m, 1H), 1.65 – 1.34 (m, 19H). <sup>13</sup>C NMR (100 MHz,  $CDCl_3$ )  $\delta$  207.94, 155.49, 136.26, 130.93, 128.64, 128.43, 128.10, 127.80, 126.73, 81.35, 72.60, 39.47, 28.24, 28.11, 21.80, 20.89. m/z HRMS (ESI) found  $[M+Na]^+$  453.2347,  $C_{24}H_{34}N_2O_5Na^+$  requires 453.2360.  $[\alpha]_D^{20} = -18.0$  (c 1.0,  $CHCl_3$ ). HPLC (Chiralpak IC column, 94:6 hexanes/ isopropanol, 1 ml/min; tr= 11.1 min (minor), 11.9 min (major); 98% ee.

(*S*)-di-*tert*-butyl 1-(2-oxo-1-vinylcyclohexyl)hydrazine-1,2-dicarboxylate (**2o**)

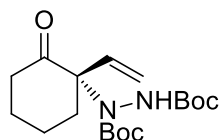

The reaction was carried out according the general procedure using **1o** (37 mg, 0.3 mmol) and (*R*)-**C<sub>8</sub>**-TCYP (18 mg, 0.015 mmol). After stirring at 45 °C for 40h, the mixture was purified by flash column chromatography (7: 1, Hexane/ethyl acetate) to afford the title product **2o** (95 mg, 89% yield). <sup>1</sup>H NMR (500 MHz,  $CDCl_3$ )  $\delta$  6.34 – 6.02 (m, 1H), 5.95 (dd,  $J = 17.7, 10.8$  Hz, 1H),



5.23 (d,  $J = 10.9$  Hz, 1H), 4.96 (d,  $J = 17.7$  Hz, 1H), 3.20 – 2.71 (m, 1H), 2.54 – 2.40 (m, 1H), 2.31 (dd,  $J = 10.9, 5.9$  Hz, 1H), 2.16 – 1.92 (m, 2H), 1.82 – 1.57 (m, 2H), 1.58 – 1.25 (m, 19H).  $^{13}\text{C}$  NMR (125 MHz,  $\text{CDCl}_3$ )  $\delta$  208.08, 155.53, 136.37, 115.65, 81.37, 72.64, 39.33, 38.97, 29.04, 28.25, 28.13, 28.05, 27.99, 21.60, 20.58.  $m/z$  HRMS (ESI) found  $[\text{M}+\text{Na}]^+$  377.2049,  $\text{C}_{18}\text{H}_{30}\text{N}_2\text{O}_5\text{Na}^+$  requires 377.2047.  $[\alpha]_{\text{D}}^{20} = -54.5$  (c 1.0,  $\text{CHCl}_3$ ). HPLC (Chiralpak IC column, 93:7 hexanes/ isopropanol, 1 ml/min;  $t_{\text{r}} = 10.1$  min (minor), 25.0 min (major); 96% ee.

(*S,Z*)-di-*tert*-butyl 1-(2-oxo-1-(prop-1-en-1-yl)cyclohexyl)hydrazine-1,2-dicarboxylate (**2p**)

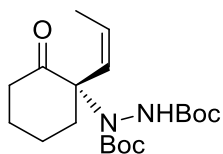

The reaction was carried out according the general procedure using **1p** (41 mg, 0.3 mmol) and (*R*)-**C<sub>8</sub>-TCYP** (18 mg, 0.015 mmol). After stirring at 45 °C for 60h, the mixture was purified by flash column chromatography (8: 1, Hexane/ EA) to afford the title product **2p** (108 mg, 98% yield).  $^1\text{H}$  NMR (500 MHz,  $\text{CDCl}_3$ )  $\delta$  6.61 – 5.86 (m, 1H), 5.80 – 5.30 (m, 2H), 2.86 – 2.27 (m, 3H), 2.22 – 1.97 (m, 1H), 2.00 – 1.70 (m, 4H), 1.59 (dd,  $J = 7.5, 1.9$  Hz, 3H), 1.41 (d,  $J = 16.1$  Hz, 18H).  $^{13}\text{C}$  NMR (125 MHz,  $\text{CDCl}_3$ )  $\delta$  207.26, 205.82, 155.59, 155.43, 155.25, 154.90, 130.95, 128.31, 128.08, 127.69, 81.61, 81.04, 80.78, 73.94, 73.11, 39.79, 39.15, 38.34, 37.11, 28.26, 28.16, 28.10, 27.97, 27.24, 21.93, 21.66, 14.56, 14.46.  $m/z$  HRMS (ESI) found  $[\text{M}+\text{Na}]^+$  391.2205,  $\text{C}_{19}\text{H}_{32}\text{N}_2\text{O}_5\text{Na}^+$  requires 391.2203.  $[\alpha]_{\text{D}}^{20} = +2.3$  (c 1.0,  $\text{CHCl}_3$ ). HPLC (Chiralpak IC column, 93:7 hexanes/ isopropanol, 1 ml/min;  $t_{\text{r}} = 11.6$  min (minor), 15.7 min (major); 99% ee.

(*S,Z*)-di-*tert*-butyl 1-(2-oxo-1-styrylcyclohexyl)hydrazine-1,2-dicarboxylate (**2q**)

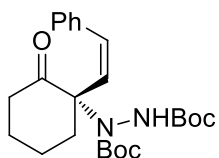

The reaction was carried out according the general procedure using **1q** (60 mg, 0.3 mmol) and (*R*)-**C<sub>8</sub>-TCYP** (18 mg, 0.015 mmol). After stirring at 45 °C for 60h, the mixture was purified by flash column chromatography (9: 1, Hexane/ethyl acetate) to afford the title product **2q** (128 mg, 99% yield).  $^1\text{H}$  NMR (500 MHz,  $\text{CDCl}_3$ )  $\delta$  7.44 – 7.32 (m, 2H), 7.30 – 7.25 (m, 1H), 7.19 – 6.99

(m, 2H), 6.83 – 6.59 (m, 1H), 6.53 – 6.28 (m, 1H), 4.75 – 2.86 (m, 1H), 2.58 – 2.22 (m, 1H), 2.17 (d,  $J = 11.6$  Hz, 1H), 2.07 – 1.88 (m, 1H), 1.84 – 1.54 (m, 3H), 1.53 – 1.45 (m, 1H), 1.45 – 1.31 (m, 19H).  $^{13}\text{C}$  NMR (125 MHz,  $\text{CDCl}_3$ )  $\delta$  208.98, 155.51, 155.11, 154.23, 138.16, 137.83, 132.06, 131.60, 129.65, 129.34, 128.86, 128.71, 128.45, 128.12, 127.76, 127.62, 127.10, 82.05, 80.70, 71.41, 39.74, 39.15, 37.51, 36.93, 36.18, 29.75, 28.24, 28.08, 28.05, 27.94, 21.66, 20.19.  $m/z$  HRMS (ESI) found  $[\text{M}+\text{Na}]^+$  453.2367,  $\text{C}_{24}\text{H}_{34}\text{N}_2\text{O}_5\text{Na}^+$  requires 453.2360. HPLC (Chiralpak IC column, 92:8 hexanes/ isopropanol, 1 ml/min;  $t_r = 10.7$  min (minor), 14.5 min (major); 99% ee.

(*S*)-di-*tert*-butyl 1-(2-oxo-[1,1'-bi(cyclohexan)]-1'-en-1-yl)hydrazine-1,2-dicarboxylate (**2r**)

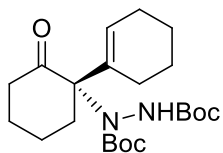

The reaction was carried out according the general procedure using **1r** (53 mg, 0.3 mmol) and (*R*)-**C<sub>8</sub>-TCYP** (18 mg, 0.015 mmol). After stirring at 45 °C for 60h, the mixture was purified by flash column chromatography (10: 1, Hexane/ethyl acetate) to afford the title product **2r** (118 mg, 96% yield).  $^1\text{H}$  NMR (500 MHz,  $\text{CDCl}_3$ )  $\delta$  6.24 – 5.47 (m, 1H), 5.41 (t,  $J = 3.8$  Hz, 1H), 2.66 (dq,  $J = 12.0, 6.2$  Hz, 1H), 2.52 (ddd,  $J = 13.5, 9.2, 3.5$  Hz, 1H), 2.32 (ddd,  $J = 14.3, 8.9, 5.5$  Hz, 1H), 2.21 (ddd,  $J = 14.1, 7.5, 3.4$  Hz, 1H), 2.14 – 2.01 (m, 2H), 1.98 – 1.89 (m, 2H), 1.88 – 1.78 (m, 2H), 1.76 – 1.69 (m, 1H), 1.66 – 1.58 (m, 1H), 1.58 – 1.47 (m, 4H), 1.47 – 1.35 (m, 18H).  $^{13}\text{C}$  NMR (125 MHz,  $\text{CDCl}_3$ )  $\delta$  207.12, 206.43, 155.74, 155.25, 134.25, 133.78, 127.64, 127.45, 82.15, 81.21, 80.71, 40.87, 40.78, 40.73, 36.69, 33.98, 28.24, 28.20, 28.14, 27.96, 27.02, 26.06, 26.00, 25.87, 25.78, 22.85, 22.73, 22.06, 21.94.  $m/z$  HRMS (ESI) found  $[\text{M}+\text{Na}]^+$  431.2523,  $\text{C}_{22}\text{H}_{36}\text{N}_2\text{O}_5\text{Na}^+$  requires 431.2516. HPLC (Chiralpak IC column, 96:4 hexanes/ isopropanol, 1 ml/min;  $t_r = 16.4$  min (minor), 37.6 min (major); 95% ee.

(*S,E*)-di-*tert*-butyl 1-(8-oxo-7-styryl-1,4-dioxaspiro[4.5]decan-7-yl)hydrazine-1,2-dicarboxylate (**2s**)

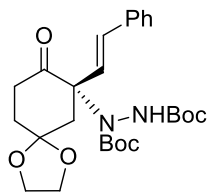

The reaction was carried out according the general procedure using **1s** (77 mg, 0.3 mmol) and **(R)-C<sub>8</sub>-TCYP** (18 mg, 0.015 mmol). After stirring at 45 °C for 60h, the mixture was purified by flash column chromatography (3: 1, Hexane/ethyl acetate) to afford the title product **2s** (120 mg, 82% yield). <sup>1</sup>H NMR (500 MHz, CDCl<sub>3</sub>) δ 7.36 (dd, *J* = 15.3, 7.5 Hz, 2H), 7.33 – 7.13 (m, 3H), 6.93 – 5.87 (m, 3H), 4.22 – 3.85 (m, 4H), 3.00 – 2.71 (m, 1H), 2.74 – 2.47 (m, 1H), 2.45 – 2.30 (m, 1H), 2.23 (dd, *J* = 24.3, 14.5 Hz, 1H), 2.11 (m, 1H), 2.00 – 1.82 (m, 1H), 1.53 – 1.07 (m, 18H). <sup>13</sup>C NMR (125 MHz, CDCl<sub>3</sub>) δ 205.18, 204.93, 204.08, 155.34, 154.71, 154.17, 153.76, 137.21, 136.57, 136.51, 134.30, 130.73, 130.01, 128.61, 128.45, 128.28, 128.21, 127.80, 127.43, 127.34, 127.27, 126.88, 126.71, 107.69, 107.19, 107.07, 82.34, 81.60, 81.41, 80.92, 80.76, 68.98, 65.37, 65.14, 64.68, 64.17, 64.11, 64.02, 43.25, 42.07, 41.11, 36.78, 36.31, 36.20, 35.98, 35.09, 34.93, 32.13, 28.22, 28.16, 28.13, 27.66, 14.23. *m/z* HRMS (ESI) found [M+Na]<sup>+</sup> 511.2415, C<sub>26</sub>H<sub>36</sub>N<sub>2</sub>O<sub>7</sub>Na<sup>+</sup> requires 511.2415. [α]<sub>D</sub><sup>20</sup> = -9.3 (c 1.0, CHCl<sub>3</sub>). HPLC (Chiralpak ASH column, 80:20 hexanes/ isopropanol, 1 ml/min; *t<sub>r</sub>* = 24.1 min (minor), 28.3 min (major); 97% ee.

**(S,E)-di-tert-butyl 1-(5,5-dimethyl-2-oxo-1-styrylcyclohexyl)hydrazine-1,2-dicarboxylate (2t)**

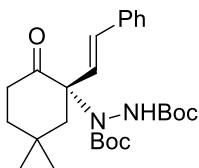

The reaction was carried out according the general procedure using **1t** (68 mg, 0.3 mmol) and **(R)-C<sub>8</sub>-TCYP** (18 mg, 0.015 mmol). After stirring at 45 °C for 60h, the mixture was purified by flash column chromatography (9: 1, Hexane/ethyl acetate) to afford the title product **2t** (113 mg, 82% yield). <sup>1</sup>H NMR (500 MHz, CDCl<sub>3</sub>) δ 7.43 – 7.23 (m, 5H), 6.55 – 6.21 (m, 2H), 6.04 (d, *J* = 16.5 Hz, 1H), 2.73 (d, *J* = 14.1 Hz, 1H), 2.63 – 2.39 (m, 2H), 2.28 – 2.01 (m, 1H), 2.01 – 1.73 (m, 1H), 1.60 – 1.52 (m, 1H), 1.49 – 1.33 (m, 18H), 1.07 (s, 6H). <sup>13</sup>C NMR (125 MHz, CDCl<sub>3</sub>) δ 207.01, 205.97, 155.55, 154.28, 136.30, 133.79, 129.05, 128.73, 128.37, 126.77, 81.98, 80.87, 71.55, 48.84, 40.46, 36.79, 36.56, 32.68, 31.10, 28.32, 28.17, 27.97, 26.58, 22.72, 22.70, 14.20,

14.17. m/z HRMS (ESI) found  $[M+Na]^+$  481.2670,  $C_{26}H_{38}N_2O_5Na^+$  requires 481.2673.  $[\alpha]_D^{20} = +66.0$  (c 1.0,  $CHCl_3$ ). HPLC (Chiralpak IC column, 92:8 hexanes/ isopropanol, 1 ml/min;  $t_r = 6.1$  min (minor), 8.2 min (major); 98% ee.

(*S,E*)-di-*tert*-butyl 1-(2-oxo-1-styrylcycloheptyl)hydrazine-1,2-dicarboxylate (**2u**)

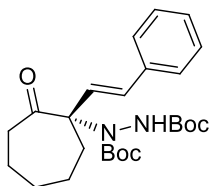

The reaction was carried out according the general procedure using **1u** (64 mg, 0.3 mmol) and (*R*)-**C<sub>8</sub>-TCYP** (18 mg, 0.015 mmol). After stirring at 45 °C for 60h, the mixture was purified by flash column chromatography (9: 1, Hexane/ EA) to afford the title product **2u** (80 mg, 60% yield).  $^1H$  NMR (500 MHz,  $CDCl_3$ )  $\delta$  7.46 – 7.35 (m, 2H), 7.30 (t,  $J = 7.6$  Hz, 2H), 7.23 (t,  $J = 7.4$  Hz, 1H), 6.94 – 5.86 (m, 3H), 3.55 – 2.57 (m, 1H), 2.52 – 2.34 (m, 1H), 2.33 – 2.18 (m, 1H), 2.12 – 1.89 (m, 1H), 1.91 – 1.53 (m, 6H), 1.53 – 1.38 (m, 18H).  $^{13}C$  NMR (125 MHz,  $CDCl_3$ )  $\delta$  208.25, 155.90, 155.14, 137.38, 136.50, 135.73, 128.63, 128.51, 128.36, 127.89, 126.72, 126.46, 82.06, 81.44, 29.40, 28.28, 28.20, 28.12, 28.01, 24.18, 22.74. m/z HRMS (ESI) found  $[M+Na]^+$  467.2519,  $C_{25}H_{36}N_2O_5Na^+$  requires 467.2516.  $[\alpha]_D^{20} = -9.3$  (c 1.0,  $CHCl_3$ ). HPLC (Chiralpak IC column, 93:7 hexanes/ isopropanol, 1 ml/min;  $t_r = 7.0$  min (major), 7.9 min (minor); 72% ee.

(*S,E*)-di-*tert*-butyl 1-(2-oxo-1-styrylcyclopentyl)hydrazine-1,2-dicarboxylate (**2v**)

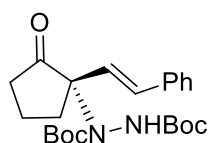

The reaction was carried out according the general procedure using **1v** (56 mg, 0.3 mmol) and (*R*)-**C<sub>8</sub>-TCYP** (18 mg, 0.015 mmol). After stirring at 45 °C for 40h, the mixture was purified by flash column chromatography (9: 1, Hexane/ethyl acetate) to afford the title product **2v** (123 mg, 99% yield).  $^1H$  NMR (500 MHz,  $CDCl_3$ )  $\delta$  7.39 – 7.33 (m, 2H), 7.31 (t,  $J = 7.4$  Hz, 2H), 7.28 – 7.24 (m, 1H), 6.59 (d,  $J = 16.3$  Hz, 1H), 6.48 – 6.14 (m, 1H), 5.90 (dd,  $J = 16.3, 4.3$  Hz, 1H), 2.87 – 2.36 (m, 3H), 2.27 (dd,  $J = 18.8, 8.3$  Hz, 1H), 2.13 – 1.98 (m, 1H), 1.86 – 1.66 (m, 1H),

1.53 – 1.32 (m, 18H).  $^{13}\text{C}$  NMR (125 MHz,  $\text{CDCl}_3$ )  $\delta$  212.56, 212.01, 155.42, 154.12, 153.62, 136.25, 135.97, 133.47, 133.42, 128.71, 128.48, 128.35, 126.82, 124.93, 124.58, 82.17, 81.77, 81.19, 72.67, 35.04, 34.81, 31.93, 28.28, 28.21, 28.17, 27.97, 18.30.  $m/z$  HRMS (ESI) found  $[\text{M}+\text{Na}]^+$  439.2208,  $\text{C}_{23}\text{H}_{32}\text{N}_2\text{O}_5\text{Na}^+$  requires 439.2203.  $[\alpha]_{\text{D}}^{20} = +115.5$  (c 1.0,  $\text{CHCl}_3$ ). HPLC (Chiralpak IC column, 93:7 hexanes/ isopropanol, 1 ml/min;  $t_{\text{r}} = 6.6$  min (minor), 7.4 min (major); 99% ee.

(*S*)-di-tert-butyl 1-(2-oxo-1-(phenylethynyl)cyclohexyl)hydrazine-1,2-dicarboxylate (**2w**)

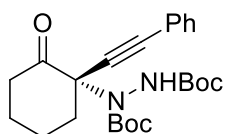

The reaction was carried out according the general procedure using **1w** (59 mg, 0.3 mmol) and (*R*)-**C<sub>8</sub>-TCYP** (18 mg, 0.015 mmol). After stirring at 45°C for 40 h, the mixture was purified by flash column chromatography (10: 1, hexanes/ ethyl acetate) to afford the title product **2w** (42 mg, 33% yield).  $^1\text{H}$  NMR (400 MHz,  $\text{CDCl}_3$ )  $\delta$  7.47 – 7.36 (m, 2H), 7.34 – 7.26 (m, 3H), 6.63 – 6.02 (m, 1H), 3.07 – 2.13 (m, 4H), 2.13 – 1.90 (m, 2H), 1.90 – 1.65 (m, 2H), 1.46 (d,  $J = 6.7$  Hz, 18H).  $^{13}\text{C}$  NMR (101 MHz,  $\text{CDCl}_3$ )  $\delta$  155.27, 153.50, 152.30, 149.75, 131.97, 131.75, 129.05, 128.79, 128.72, 128.33, 122.27, 115.47, 85.08, 83.63, 81.67, 81.32, 79.67, 38.44, 36.73, 28.29, 28.23, 28.16, 28.02, 27.61, 27.55, 22.51, 21.97, 21.20.  $m/z$  HRMS (EI) found  $[\text{M}]^+$  428.2307,  $\text{C}_{24}\text{H}_{32}\text{N}_2\text{O}_5^+$  requires 428.2311.  $[\alpha]_{\text{D}}^{20} = +44.5$  (c 1.0,  $\text{CHCl}_3$ ). HPLC (Chiralpak OD column, 98:2 hexanes/isopropanol, 0.5 ml/min;  $t_{\text{r}} = 17.3$  min (minor), 24.2 min (major); 93% ee.

(*R*)-di-tert-butyl 1-(1-methyl-2-oxocyclohexyl)hydrazine-1,2-dicarboxylate (**2x**)

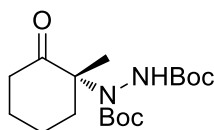

The reaction was carried out according the general procedure using **1x** (33 mg, 0.3 mmol) and (*R*)-**C<sub>8</sub>-TCYP** (18 mg, 0.015 mmol). After stirring at 45°C for 40 h, the mixture was purified by flash column chromatography (5: 1, hexanes/ ethyl acetate) to afford the title product **2x** (96 mg, 94% yield).  $^1\text{H}$  NMR (400 MHz,  $\text{CDCl}_3$ )  $\delta$  6.85 – 6.19 (m, 1H), 3.03 – 2.48 (m, 1H), 2.49 – 2.12

(m, 2H), 2.05 – 1.80 (m, 1H), 1.73 – 0.99 (m, 25H).  $^{13}\text{C}$  NMR (100 MHz,  $\text{CDCl}_3$ )  $\delta$  209.46, 208.91, 155.65, 155.04, 154.81, 82.14, 81.26, 81.08, 69.96, 68.86, 39.89, 38.76, 38.31, 29.42, 28.15, 28.02, 21.77, 20.99, 20.23.  $m/z$  HRMS (EI) found  $[\text{M}]^+$  342.2158,  $\text{C}_{17}\text{H}_{30}\text{N}_2\text{O}_5^+$  requires 342.2155.  $[\alpha]_{\text{D}}^{20} = -18.9$  (c 1.0,  $\text{CHCl}_3$ ).

(*R*)-*N*-(1-methyl-2-oxocyclohexyl)benzamide (**S4**)

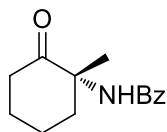

To a solution of **2x** (78 mg, 0.23 mmol) in DCM (3 mL) was added TFA (1.5 ml) at rt. After stirring for 3h, acetone (1.5 mL) was added and the mixture was stirred for another 10 min before concentration *in vacuo*.

To the solution of the above residue in HOAc (3 ml) was added active zinc powder (300 mg). After purging with  $\text{N}_2$ , the mixture was stirred overnight. After filtration, the filtrate was concentrated *in vacuo* to afford a residue, which was diluted with DCM and basified with satd.  $\text{Na}_2\text{CO}_3$  solution. Extraction with DCM five times to afford the organic layer, which was dried over  $\text{Na}_2\text{SO}_4$ , filtered and concentrated *in vacuo* to give a residue.

To the solution of the above residue in DCM (3 mL) was added  $\text{Et}_3\text{N}$  (95  $\mu\text{L}$ , 0.68 mmol) and  $\text{BzCl}$  (53  $\mu\text{L}$ , 0.46 mmol) at rt. After stirring for 3 h, satd.  $\text{NaHCO}_3$  solution was added into the mixture, which was then extracted with DCM for 3 times. The combined organic layer was washed with brine, dried over  $\text{Na}_2\text{SO}_4$ , filtered and concentrated *in vacuo* to give a residue, which was purified by flash chromatography (3: 1, Hexane/ ethyl acetate) to afford **S4** (11 mg, 21% yield).  $^1\text{H}$  NMR (400 MHz,  $\text{CDCl}_3$ )  $\delta$  7.80 (d,  $J = 7.6$  Hz, 1H), 7.66 (s, 1H), 7.53 – 7.46 (m, 1H), 7.43 (dd,  $J = 8.2, 6.7$  Hz, 1H), 3.07 (ddd,  $J = 11.0, 4.2, 2.2$  Hz, 1H), 2.66 (ddd,  $J = 13.8, 12.1, 6.3$  Hz, 1H), 2.56 – 2.45 (m, 1H), 2.09 (ddd,  $J = 9.4, 5.9, 3.2$  Hz, 1H), 1.88 – 1.75 (m, 3H), 1.72 (s, 3H).  $^{13}\text{C}$  NMR (101 MHz,  $\text{CDCl}_3$ )  $\delta$  210.94, 166.21, 135.17, 131.54, 128.66, 127.05, 62.80, 38.92, 37.55, 27.98, 22.04, 21.36.  $[\alpha]_{\text{D}}^{20} = +9.2$  (c 0.5,  $\text{CHCl}_3$ ). HPLC (Chiralpak IC column, 80:20 hexanes/isopropanol, 1.0 ml/min;  $t_{\text{r}} = 12.6$  min (minor), 15.7 min (major); 86% ee.

(*S*)-di-*tert*-butyl 1-(1-benzyl-2-oxocyclohexyl)hydrazine-1,2-dicarboxylate (**2y**)

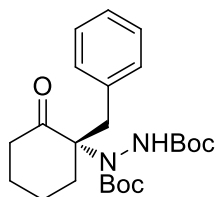

The reaction was carried out according the general procedure using **1y** (57 mg, 0.3 mmol) and (*R*)-**C<sub>8</sub>-TCYP** (36 mg, 0.03 mmol). After stirring at 45°C for 40 h, the mixture was purified by flash column chromatography (10: 1, Hexane/ EA) to afford the title product **2y** (111 mg, 89% yield). <sup>1</sup>H NMR (400 MHz, CDCl<sub>3</sub>) δ 7.37 – 7.26 (m, 3H), 7.11 – 6.99 (m, 2H), 5.18 – 4.43 (m, 1H), 3.58 – 2.87 (m, 2H), 2.83 – 2.63 (m, 1H), 2.57 – 2.38 (m, 1H), 2.35 – 2.19 (m, 1H), 2.15 – 2.00 (m, 1H), 1.88 – 1.57 (m, 2H), 1.53 – 1.33 (m, 20H). <sup>13</sup>C NMR (101 MHz, CDCl<sub>3</sub>) δ 210.42, 210.05, 155.71, 155.41, 155.12, 154.59, 137.65, 137.23, 130.34, 130.24, 128.99, 128.79, 127.32, 126.96, 82.62, 82.47, 82.02, 81.23, 72.16, 71.48, 71.40, 40.48, 39.20, 38.96, 38.52, 38.16, 37.98, 36.74, 30.44, 30.11, 29.95, 28.18, 20.07. [α]<sub>D</sub><sup>20</sup> = -92.5 (c 1.0, CHCl<sub>3</sub>). HPLC (Chiralpak IA column, 97:3 hexanes/isopropanol, 1 ml/min; tr= 11.6 min (minor), 12.8 min (major); 99% ee.

#### Kinetic resolution procedure:

(*R*)-di-*tert*-butyl 1-(2-oxo-1-(thiophen-2-yl)cyclohexyl)hydrazine-1,2-dicarboxylate (**2z**)

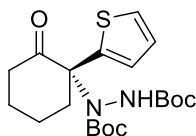

To a solution of **1z** (54 mg, 0.3 mmol) in DCM (0.6 mL) was added *di*-*tert*butyl azodicarboxylates (90 mg, 0.39 mmol), 5Å MS (50 mg), and (*R*)-**C<sub>8</sub>-TCYP** (36 mg, 0.03 mmol). After stirring for 60 at rt, the mixture was purified by flash column chromatography (10: 1 to 6: 1, Hexane/ethyl acetate) to afford the recovered starting material **1z** (24 mg, 45% yield, 96% ee) and the title product **2z** (68 mg, 55% yield, 93% ee). HPLC data for recovered **1z**: HPLC (Chiralpak IC column, 95:5 hexanes/ isopropanol, 1 ml/min; tr = 17.8 min (major), 20.2 min (minor); 96% ee. Data for **2z**: <sup>1</sup>H NMR (500 MHz, CDCl<sub>3</sub>) δ 7.29 (d, *J* = 5.1 Hz, 1H), 6.95 (t, *J* = 4.4 Hz, 1H), 6.93 – 6.87 (m, 1H), 6.06 – 5.55 (m, 1H), 3.17 – 2.80 (m, 2H), 2.50 – 2.36 (m, 1H), 2.29 – 1.98 (m, 3H), 1.80 – 1.66 (m, 1H), 1.63 – 1.55 (m, 1H), 1.52 – 1.38 (m, 18H). <sup>13</sup>C

NMR (125 MHz, CDCl<sub>3</sub>)  $\delta$  155.24, 141.54, 129.32, 126.47, 126.42, 120.92, 114.48, 112.17, 83.71, 81.73, 81.28, 72.40, 39.65, 28.20, 28.08, 27.97, 21.24. m/z HRMS (ESI) found [M+Na]<sup>+</sup> 433.1767, C<sub>20</sub>H<sub>30</sub>N<sub>2</sub>O<sub>5</sub>SNa<sup>+</sup> requires 433.1768.  $[\alpha]_D^{20} = -53.8$  (c 1.0, CHCl<sub>3</sub>). HPLC (Chiralpak IC column, 92:8 hexanes/ isopropanol, 1 ml/min; tr= 12.4 min (minor), 17.8 min (major); 93% ee.

#### Kinetic resolution conditions for **1n** and **1t**:

To a solution of **1n** or **1t** (0.3 mmol) in DCM (3 mL) was added *di*-tert-butyl azodicarboxylates (90 mg, 0.36 mmol), 5 Å MS (50 mg), and (**R**)-C<sub>8</sub>-TCYP (18 mg, 0.015 mmol). After stirring for 40h at rt, the mixture was purified by flash column chromatography (15: 1 to 10: 1, hexane/ ethyl acetate) to afford the recovered starting material and the amination product.

For **1n**: Starting ketone **1n** (25 mg, 41% yield, 99% ee) was recovered with product **2a** (76 mg, 59% yield, 99% ee) obtained. HPLC data for recovered **1n**: HPLC (Chiralpak IC column, 95:5 hexanes/ isopropanol, 1 ml/min; tr = 15.8 min (major), 20.5 min (minor); 99% ee.

For **1t**: Starting ketone **1t** (20 mg, 30% yield, 97% ee) was recovered with product **2t** (96 mg, 70% yield, 97% ee) obtained. HPLC data for recovered **1a**: HPLC (Chiralpak IC column, 95:5 hexanes/ isopropanol, 1 ml/min; tr = 14.6 min (major), 21.1 min (minor); 97% ee.

#### Determine of the absolute configuration of recovered **1a**:

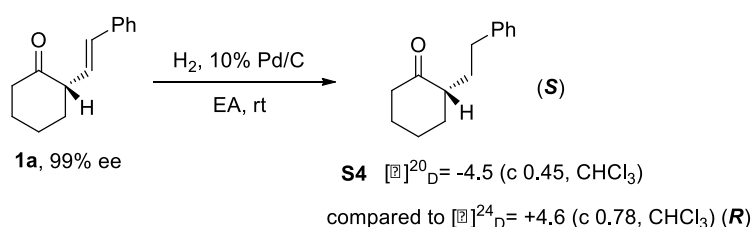

To a solution of **1a** (14 mg, 0.07 mmol) in ethyl acetate (2 mL) was added 10% Pd/C (40 mg) at rt. After purging with H<sub>2</sub>, the mixture was stirred at rt for 3h. Filtration and concentration in vacuo gave a residue, which was purified by flash column chromatography (20 :1, hexane/ ethyl acetate) to give the title product **S4** (6.7 mg, 47% yield). The absolute configuration of the stereocenter was determined to be (*S*) by comparison of the optical rotation of **S4** with literature<sup>15</sup>.

#### Large-scale synthesis example:



To the substrate **1a** (348 mg, 2.0 mmol) in a 1 dram (15 x 45 mm) vial equipped with an 8 mm magnetic stirrer bar was added DCM (1.0 ml). Subsequently, *di*-tert-butyl azodicarboxylates (598 mg, 2.6 mmol), 5Å MS (300 mg), and (*R*)-**C<sub>8</sub>-TCYP** (240 mg, 0.2 mmol) were added. After all the reagents were dissolved, the mixture was warmed to 45 °C with the cap open. After about 2h, the DCM was evaporated, leaving the mixture as syrup. After heated at 45 °C for another 48 h, the mixture was cooled to rt and directly purified by flash column chromatography (10: 1 to 3: 1 hexane: ethyl acetate) to afford the desired product **2a** (775 mg, 96% yield, 99% ee) with recovery of (*R*)-**C<sub>8</sub>-TCYP** (83 mg).

### Transformation of the products:

*N*-((*1S,2R*)-2-hydroxy-1-phenylcyclohexyl)benzamide (**3a**)

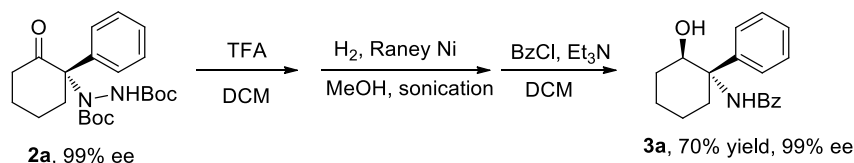

To a solution of **2a** (130 mg, 0.322 mmol) in DCM (3 mL) was added TFA (1.5 mL) at rt. After stirring for 3 h, the mixture was concentrated to afford a residue.

To the solution of the above residue in MeOH (4 mL) was added Raney Ni (200 mg). After purging with H<sub>2</sub>, the mixture was stirred overnight under sonication. Then the mixture was filtered and concentrated to give a residue.

To the solution of the above residue in DCM (3 mL) was added Et<sub>3</sub>N (134 uL, 0.97 mmol) and BzCl (75 uL, 0.64 mmol) at rt. After stirring for 3 h, satd. NaHCO<sub>3</sub> solution was added into the mixture, which was then extracted with DCM for 3 times. The combined organic layer was washed with brine, dried over Na<sub>2</sub>SO<sub>4</sub>, filtered and concentrated *in vacuo* to give a residue, which was purified by flash chromatography (3: 1, Hexane/ ethyl acetate) to afford **3a** (66 mg, 70% yield). <sup>1</sup>H NMR (400 MHz, CDCl<sub>3</sub>) δ 7.73 (d, *J* = 7.4 Hz, 2H), 7.65 (d, *J* = 7.8 Hz, 2H), 7.50 (t, *J* = 7.4 Hz, 1H), 7.42 (t, *J* = 7.5 Hz, 2H), 7.36 (t, *J* = 7.6 Hz, 2H), 7.30 – 7.23 (m, 1H), 6.46 (s, 1H), 4.13 (t, *J* = 4.9 Hz, 1H), 3.45 – 2.56 (brs, 1H), 2.53 – 2.31 (m, 2H), 2.09 – 1.89 (m, 2H), 1.83 – 1.68 (m, 1H), 1.65 – 1.43 (m, 3H). <sup>13</sup>C NMR (100 MHz, CDCl<sub>3</sub>) δ 166.99, 142.50, 135.08, 131.73, 128.75, 128.61, 127.43, 127.19, 127.01, 74.64, 62.14, 31.29, 29.88, 21.61, 21.13.

m/z HRMS (ESI) found  $[M+H]^+$  296.1645,  $C_{19}H_{22}NO_2^+$  requires 296.1645.  $[\alpha]_D^{20} = -32.6$  (c 1.0,  $CHCl_3$ ). HPLC (Chiralpak IA column, 90:10 hexanes/ isopropanol, 1 ml/min;  $t_r = 17.1$  min (minor), 18.5 min (major); 99% ee.

(S)-Ketamine:

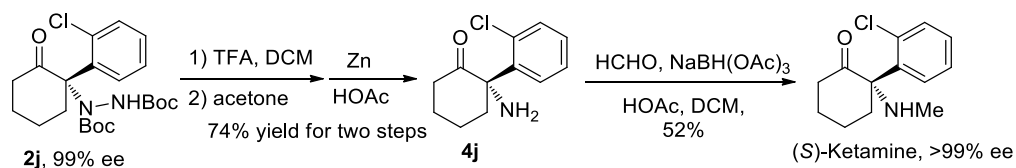

To a solution of **2j** (255 mg, 0.58 mmol) in DCM (5 mL) was added TFA (2.5 ml) at rt. After stirring for 3h, acetone (3 mL) was added and the mixture was stirred for another 10 min before concentration *in vacuo*.

To the solution of the above residue in HOAc (5 ml) was added active zinc powder (500 mg). After purging with  $N_2$ , the mixture was stirred overnight. After filtration, the filtrate was concentrated *in vacuo* to afford a residue, which was diluted with DCM and basified with satd.  $Na_2CO_3$  solution. Extraction with DCM five times to afford the organic layer, which was dried over  $Na_2SO_4$ , filtered and concentrated *in vacuo* to give a residue, which was purified by flash chromatography (1: 1, Hexane/ EA) to afford **4j** (96 mg, 74% yield). The  $^1H$  NMR was matched with the literature<sup>16</sup>.

To the solution of **4j** (12.0 mg, 0.54 mmol) in MeOH (1 mL) was added HCHO (5.2 uL, 37% aqueous solution, 0.065 mmol), HOAc (3.1 uL, 0.054 mmol) and  $NaBH(OAc)_3$  (17 mg, 0.081) successively. After stirring overnight, satd.  $Na_2CO_3$  solution was added. The mixture was extracted with  $Et_2O$  three times and the combined organic layer was then dried over  $Na_2SO_4$ , filtered and concentrated *in vacuo* to give a residue, which was purified by flash chromatography (3: 2, Hexane/ethyl acetate) to afford (S)-Ketamine (6.6 mg, 52% yield). The  $^1H$  NMR was matched with the literature<sup>17</sup>.  $[\alpha]_D^{20} = -55.5$  (c 0.47, EtOH), compared to  $[\alpha]_D^{20} = -56.3$  (c 1.20, EtOH)<sup>17</sup>. HPLC (Chiralpak ASH column, 95:5 hexanes/ isopropanol, 1 ml/min;  $t_r = 6.5$  min (major), 7.3 min (minor); >99% ee.

### Asymmetric Mannich reaction example:

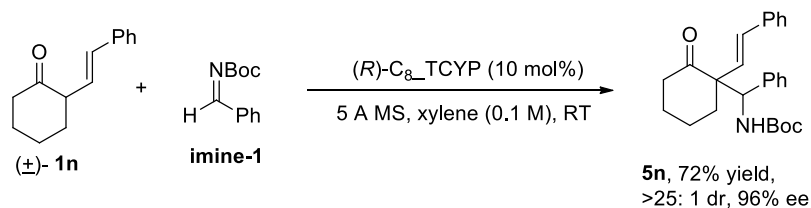

To a solution of **1n** (60 mg, 0.3 mmol) in xylene (3.0 mL) was added **imine-1** (92 mg, 0.45 mmol), 5 Å MS (50 mg), and **(R)-C<sub>8</sub>-TCYP** (36 mg, 0.03 mmol). After stirring for 40h at rt, the mixture was purified by fast column chromatography (10: 1, Hexane/ EA) to afford the desired product **5n** (87 mg, 72% yield, 96% ee). Data for **5n**: <sup>1</sup>H NMR (400 MHz, CDCl<sub>3</sub>) δ 7.48 – 7.21 (m, 10H), 6.43 – 6.13 (m, 3H), 4.76 (d, *J* = 10.4 Hz, 1H), 2.60 (ddd, *J* = 15.3, 11.6, 6.2 Hz, 1H), 2.42 (dt, *J* = 15.5, 4.7 Hz, 1H), 2.07 – 1.95 (m, 1H), 1.92 – 1.69 (m, 5H), 1.25 (s, 9H). <sup>13</sup>C NMR (150 MHz, CDCl<sub>3</sub>) δ 213.35, 155.48, 139.71, 136.74, 133.22, 131.75, 129.28, 128.66, 128.19, 127.97, 127.42, 126.56, 79.25, 60.51, 59.85, 40.55, 35.97, 32.00, 28.34, 25.93, 21.33. *m/z* HRMS (ESI) found [M+H]<sup>+</sup> 406.2382, C<sub>26</sub>H<sub>32</sub>NO<sub>3</sub><sup>+</sup> requires 406.2377. HPLC (Chiralpak IC column, 97:3 hexanes/ isopropanol, 1 ml/min; *t<sub>r</sub>* = 11.4 min (major), 19.0 min (minor); 96% ee.

## References:

- 1) Seayad, J.; Seayad, A. M.; List, B. *J. Am. Chem. Soc.* **2006**, *128*, 1086.
- 2) Rauniyar, V.; Wang, Z. J.; Burks, H. E.; Toste, F. D. *J. Am. Chem. Soc.* **2011**, *133*, 8486.
- 3) Hamilton, G. L.; Kang, E. J.; Mba, M.; Toste, F. D. *Science* **2007**, *317*, 496.
- 4) Sattely, E. S.; Meek, S. J.; Malcolmson, S. J.; Schrock, R. R.; Hoveyda, A. H. *J. Am. Chem. Soc.* **2008**, *131*, 943.
- 5) Yang, X.; Phipps, R. J.; Toste, F. D. *J. Am. Chem. Soc.* **2014**, *136*, 5225.
- 6) Gao, S.; Tu, Y. Q.; Song, Z.; Wang, A.; Fan, X.; Jiang, Y. *J. Org. Chem.* **2005**, *70*, 6523.
- 7) Han, X.; Wang, X.; Pei, T.; Widenhoefer, R. A. *Chem. –Eur. J.* **2004**, *10*, 6333.
- 8) Gutiérrez-Bonet, Á.; Flores-Gaspar, A.; Martin, R. *J. Am. Chem. Soc.* **2013**, *135*, 12576.
- 9) Santosa R. P.; Lopes R. S. C.; Lopes, C. C. *Synthesis* **2001**, *6*, 845.
- 10) Willis, M. C.; Taylor, D.; Gillmore, A. T. *Org. Lett.* **2004**, *6*, 4755.
- 11) Gris , C. M.; Barriault, L. *Org. Lett.* **2006**, *8*, 5905.
- 12) Quan, L. G.; Cha, J. K. *Org. Lett.* **2001**, *3*, 2745.
- 13) Trofimov, B. A.; Schmidt, E. Y.; Zorina, N. V.; Ivanova, E. V.; Ushakov, I. A. *J. Org. Chem.* **2012**, *77*, 6880.
- 14) Trofimov, B. A.; Schmidt, E. Y.; Zorina, N. V.; Ivanova, E. V.; Ushakov, I. A.; Mikhaleva, A. I. *Adv. Synth. Catal.* **2012**, *354*, 1813.
- 15) a) Nakamura, M.; Hatakeyama, T.; Hara, K.; Nakamura, E. *J. Am. Chem. Soc.* **2003**, *125*, 6362. (b) Yamashita, M.; Yamada, K.-i.; Tomioka, K. *Org. Lett.* **2005**, *7*, 2369.
- 16) Jose, J.; Gamage, S. A.; Harvey, M. G.; Voss, L. J.; Sleigh, J. W.; Denny, W. A. *Bioorg. Med. Chem.* **2013**, *21*, 5098.
- 17) Yokoyama, R.; Matsumoto, S.; Nomura, S.; Higaki, T.; Yokoyama, T.; Kiyooka, S.-i. *Tetrahedron* **2009**, *65*, 5181.

## X-Ray Crystal Structure Data for 2v

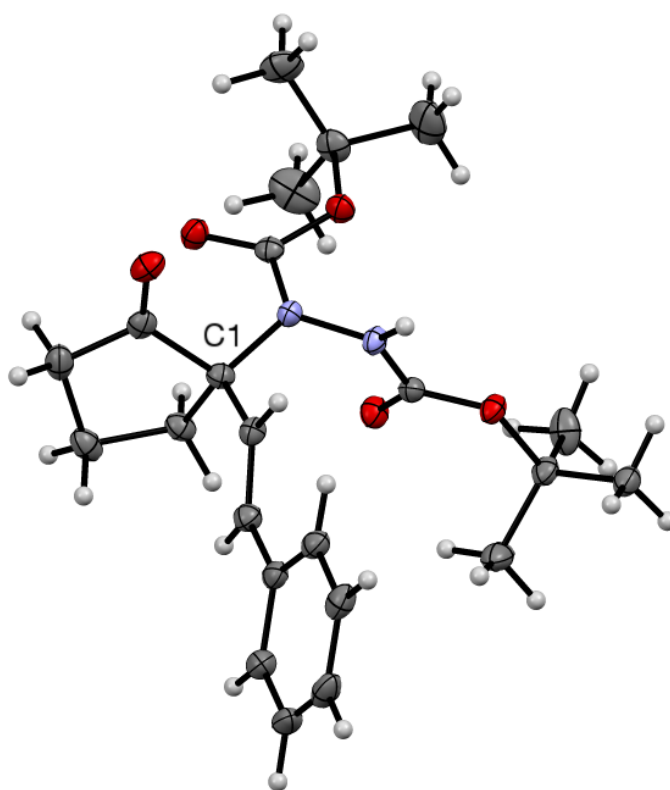

A colorless block 0.13 x 0.06 x 0.03 mm in size was mounted on a Cryoloop with Paratone oil. Data were collected in a nitrogen gas stream at 100(2) K using phi and omega scans. Crystal-to-detector distance was 60 mm and exposure time was 5 seconds per frame using a scan width of 1.0°. Data collection was 99.7% complete to 67.00° in  $\theta$ . A total of 21859 reflections were collected covering the indices,  $-12 \leq h \leq 10$ ,  $-12 \leq k \leq 12$ ,  $-13 \leq l \leq 13$ . 4110 reflections were

found to be symmetry independent, with an  $R_{\text{int}}$  of 0.0338. Indexing and unit cell refinement indicated a primitive, orthorhombic lattice. The space group was found to be P2(1) (No. 4). The data were integrated using the Bruker SAINT software program and scaled using the SADABS software program. Solution by direct methods (SHELXL-2013) produced a complete heavy-atom phasing model consistent with the proposed structure. All non-hydrogen atoms were refined anisotropically by full-matrix least-squares (SHELXL-2013). All hydrogen atoms were placed using a riding model. Their positions were constrained relative to their parent atom using the appropriate HFIX command in SHELXL-97. Absolute stereochemistry was unambiguously determined to be *S* at C1.

Table 1. Crystal data and structure refinement for xy001.

|                        |                            |                             |
|------------------------|----------------------------|-----------------------------|
| Identification code    | XY001                      |                             |
| Empirical formula      | C1.77 H2.46 F0 N0.15 O0.38 |                             |
| Formula weight         | 32.04                      |                             |
| Temperature            | 100(2) K                   |                             |
| Wavelength             | 1.54178 Å                  |                             |
| Crystal system         | Monoclinic                 |                             |
| Space group            | P 2(1)                     |                             |
| Unit cell dimensions   | $a = 10.2527(6)$ Å         | $\alpha = 90^\circ$ .       |
|                        | $b = 10.1344(6)$ Å         | $\beta = 95.063(2)^\circ$ . |
|                        | $c = 11.1386(6)$ Å         | $\gamma = 90^\circ$ .       |
| Volume                 | 1152.84(11) Å <sup>3</sup> |                             |
| Z                      | 26                         |                             |
| Density (calculated)   | 1.200 Mg/m <sup>3</sup>    |                             |
| Absorption coefficient | 0.686 mm <sup>-1</sup>     |                             |
| F(000)                 | 448                        |                             |

|                                   |                                             |
|-----------------------------------|---------------------------------------------|
| Crystal size                      | 0.130 x 0.060 x 0.030 mm <sup>3</sup>       |
| Theta range for data collection   | 3.984 to 68.228°.                           |
| Index ranges                      | -12<=h<=10, -12<=k<=12, -13<=l<=13          |
| Reflections collected             | 21859                                       |
| Independent reflections           | 4110 [R(int) = 0.0338]                      |
| Completeness to theta = 67.000°   | 99.7 %                                      |
| Absorption correction             | Semi-empirical from equivalents             |
| Max. and min. transmission        | 0.7531 and 0.7121                           |
| Refinement method                 | Full-matrix least-squares on F <sup>2</sup> |
| Data / restraints / parameters    | 4110 / 1 / 277                              |
| Goodness-of-fit on F <sup>2</sup> | 1.027                                       |
| Final R indices [I>2sigma(I)]     | R1 = 0.0253, wR2 = 0.0649                   |
| R indices (all data)              | R1 = 0.0255, wR2 = 0.0651                   |
| Absolute structure parameter      | 0.04(3)                                     |
| Extinction coefficient            | n/a                                         |
| Largest diff. peak and hole       | 0.180 and -0.196 e.Å <sup>-3</sup>          |

Table 2. Atomic coordinates ( $\times 10^4$ ) and equivalent isotropic displacement parameters ( $\text{\AA}^2 \times 10^3$ )

for xy001.  $U(\text{eq})$  is defined as one third of the trace of the orthogonalized  $U^{ij}$  tensor.

|       | x       | y       | z       | $U(\text{eq})$ |
|-------|---------|---------|---------|----------------|
| C(14) | 5333(2) | 7760(2) | 5606(1) | 18(1)          |
| C(15) | 7142(2) | 7625(2) | 7186(2) | 21(1)          |
| C(16) | 8144(2) | 7042(2) | 6415(2) | 34(1)          |
| C(17) | 6463(2) | 6577(2) | 7874(2) | 32(1)          |
| C(18) | 7743(2) | 8678(2) | 8036(2) | 25(1)          |
| C(19) | 3752(2) | 7923(2) | 3126(1) | 18(1)          |
| N(2)  | 4432(1) | 8656(1) | 5130(1) | 18(1)          |
| O(3)  | 5331(1) | 6604(1) | 5339(1) | 22(1)          |
| O(4)  | 4936(1) | 8358(1) | 2923(1) | 22(1)          |
| O(5)  | 6161(1) | 8382(1) | 6411(1) | 20(1)          |
| C(1)  | 2291(2) | 7599(2) | 4723(1) | 18(1)          |
| C(2)  | 2293(2) | 6084(2) | 4724(2) | 22(1)          |
| C(3)  | 835(2)  | 5700(2) | 4530(2) | 26(1)          |
| C(4)  | 234(2)  | 6731(2) | 3647(2) | 27(1)          |
| C(5)  | 1060(2) | 7955(2) | 3855(1) | 21(1)          |
| C(6)  | 2039(2) | 8219(2) | 5914(1) | 19(1)          |



|       |         |         |          |       |
|-------|---------|---------|----------|-------|
| C(7)  | 1827(2) | 7548(2) | 6908(1)  | 21(1) |
| C(8)  | 1535(2) | 8094(2) | 8077(1)  | 21(1) |
| C(9)  | 1287(2) | 7219(2) | 9004(2)  | 26(1) |
| C(10) | 1027(2) | 7685(2) | 10127(2) | 31(1) |
| C(11) | 990(2)  | 9023(2) | 10352(2) | 31(1) |
| C(12) | 1235(2) | 9904(2) | 9442(2)  | 27(1) |
| C(13) | 1510(2) | 9444(2) | 8318(2)  | 22(1) |
| C(20) | 5512(2) | 7966(2) | 1802(2)  | 26(1) |
| C(21) | 4749(2) | 8584(2) | 713(2)   | 36(1) |
| C(22) | 5560(3) | 6473(2) | 1724(2)  | 45(1) |
| C(23) | 6871(2) | 8552(3) | 1995(2)  | 45(1) |
| N(1)  | 3456(1) | 8230(1) | 4280(1)  | 18(1) |
| O(1)  | 813(1)  | 9040(1) | 3466(1)  | 25(1) |
| O(2)  | 2973(1) | 7359(1) | 2424(1)  | 22(1) |

---

Table 3. Bond lengths [ $\text{\AA}$ ] and angles [ $^\circ$ ] for xy001.

---

|              |            |            |          |
|--------------|------------|------------|----------|
| C(14)-O(3)   | 1.209(2)   | N(2)-H(2)  | 0.8800   |
| C(14)-O(5)   | 1.337(2)   | O(4)-C(20) | 1.482(2) |
| C(14)-N(2)   | 1.369(2)   | C(1)-N(1)  | 1.477(2) |
| C(15)-O(5)   | 1.4802(19) | C(1)-C(6)  | 1.510(2) |
| C(15)-C(17)  | 1.515(3)   | C(1)-C(2)  | 1.536(2) |
| C(15)-C(16)  | 1.515(3)   | C(1)-C(5)  | 1.563(2) |
| C(15)-C(18)  | 1.521(2)   | C(2)-C(3)  | 1.541(2) |
| C(16)-H(16A) | 0.9800     | C(2)-H(2A) | 0.9900   |
| C(16)-H(16B) | 0.9800     | C(2)-H(2B) | 0.9900   |
| C(16)-H(16C) | 0.9800     | C(3)-C(4)  | 1.528(3) |
| C(17)-H(17A) | 0.9800     | C(3)-H(3A) | 0.9900   |
| C(17)-H(17B) | 0.9800     | C(3)-H(3B) | 0.9900   |
| C(17)-H(17C) | 0.9800     | C(4)-C(5)  | 1.508(3) |
| C(18)-H(18A) | 0.9800     | C(4)-H(4A) | 0.9900   |
| C(18)-H(18B) | 0.9800     | C(4)-H(4B) | 0.9900   |
| C(18)-H(18C) | 0.9800     | C(5)-O(1)  | 1.201(2) |
| C(19)-O(2)   | 1.211(2)   | C(6)-C(7)  | 1.333(2) |
| C(19)-O(4)   | 1.330(2)   | C(6)-H(6)  | 0.9500   |
| C(19)-N(1)   | 1.382(2)   | C(7)-C(8)  | 1.470(2) |
| N(2)-N(1)    | 1.3839(18) | C(7)-H(7)  | 0.9500   |

|              |          |                     |            |
|--------------|----------|---------------------|------------|
| C(8)-C(13)   | 1.395(3) |                     |            |
| C(8)-C(9)    | 1.400(2) | O(3)-C(14)-O(5)     | 127.54(15) |
| C(9)-C(10)   | 1.385(3) | O(3)-C(14)-N(2)     | 124.10(15) |
| C(9)-H(9)    | 0.9500   | O(5)-C(14)-N(2)     | 108.34(13) |
| C(10)-C(11)  | 1.380(3) | O(5)-C(15)-C(17)    | 109.82(14) |
| C(10)-H(10)  | 0.9500   | O(5)-C(15)-C(16)    | 109.35(14) |
| C(11)-C(12)  | 1.390(3) | C(17)-C(15)-C(16)   | 112.22(16) |
| C(11)-H(11)  | 0.9500   | O(5)-C(15)-C(18)    | 102.48(13) |
| C(12)-C(13)  | 1.388(2) | C(17)-C(15)-C(18)   | 110.85(15) |
| C(12)-H(12)  | 0.9500   | C(16)-C(15)-C(18)   | 111.66(15) |
| C(13)-H(13)  | 0.9500   | C(15)-C(16)-H(16A)  | 109.5      |
| C(20)-C(23)  | 1.512(3) | C(15)-C(16)-H(16B)  | 109.5      |
| C(20)-C(22)  | 1.516(3) | H(16A)-C(16)-H(16B) | 109.5      |
| C(20)-C(21)  | 1.519(3) | C(15)-C(16)-H(16C)  | 109.5      |
| C(21)-H(21A) | 0.9800   | H(16A)-C(16)-H(16C) | 109.5      |
| C(21)-H(21B) | 0.9800   | H(16B)-C(16)-H(16C) | 109.5      |
| C(21)-H(21C) | 0.9800   | C(15)-C(17)-H(17A)  | 109.5      |
| C(22)-H(22A) | 0.9800   | C(15)-C(17)-H(17B)  | 109.5      |
| C(22)-H(22B) | 0.9800   | H(17A)-C(17)-H(17B) | 109.5      |
| C(22)-H(22C) | 0.9800   | C(15)-C(17)-H(17C)  | 109.5      |
| C(23)-H(23A) | 0.9800   | H(17A)-C(17)-H(17C) | 109.5      |
| C(23)-H(23B) | 0.9800   | H(17B)-C(17)-H(17C) | 109.5      |
| C(23)-H(23C) | 0.9800   | C(15)-C(18)-H(18A)  | 109.5      |

|                     |            |                  |            |
|---------------------|------------|------------------|------------|
| C(15)-C(18)-H(18B)  | 109.5      | C(3)-C(2)-H(2B)  | 110.8      |
| H(18A)-C(18)-H(18B) | 109.5      | H(2A)-C(2)-H(2B) | 108.9      |
| C(15)-C(18)-H(18C)  | 109.5      | C(4)-C(3)-C(2)   | 104.37(14) |
| H(18A)-C(18)-H(18C) | 109.5      | C(4)-C(3)-H(3A)  | 110.9      |
| H(18B)-C(18)-H(18C) | 109.5      | C(2)-C(3)-H(3A)  | 110.9      |
| O(2)-C(19)-O(4)     | 127.31(14) | C(4)-C(3)-H(3B)  | 110.9      |
| O(2)-C(19)-N(1)     | 121.40(15) | C(2)-C(3)-H(3B)  | 110.9      |
| O(4)-C(19)-N(1)     | 111.27(13) | H(3A)-C(3)-H(3B) | 108.9      |
| C(14)-N(2)-N(1)     | 118.72(13) | C(5)-C(4)-C(3)   | 105.94(14) |
| C(14)-N(2)-H(2)     | 120.6      | C(5)-C(4)-H(4A)  | 110.5      |
| N(1)-N(2)-H(2)      | 120.6      | C(3)-C(4)-H(4A)  | 110.5      |
| C(19)-O(4)-C(20)    | 119.50(13) | C(5)-C(4)-H(4B)  | 110.5      |
| C(14)-O(5)-C(15)    | 120.35(12) | C(3)-C(4)-H(4B)  | 110.5      |
| N(1)-C(1)-C(6)      | 108.63(13) | H(4A)-C(4)-H(4B) | 108.7      |
| N(1)-C(1)-C(2)      | 115.59(14) | O(1)-C(5)-C(4)   | 126.85(16) |
| C(6)-C(1)-C(2)      | 114.58(14) | O(1)-C(5)-C(1)   | 124.62(15) |
| N(1)-C(1)-C(5)      | 109.02(12) | C(4)-C(5)-C(1)   | 108.48(14) |
| C(6)-C(1)-C(5)      | 104.80(13) | C(7)-C(6)-C(1)   | 124.78(15) |
| C(2)-C(1)-C(5)      | 103.41(13) | C(7)-C(6)-H(6)   | 117.6      |
| C(1)-C(2)-C(3)      | 104.56(14) | C(1)-C(6)-H(6)   | 117.6      |
| C(1)-C(2)-H(2A)     | 110.8      | C(6)-C(7)-C(8)   | 127.24(16) |
| C(3)-C(2)-H(2A)     | 110.8      | C(6)-C(7)-H(7)   | 116.4      |
| C(1)-C(2)-H(2B)     | 110.8      | C(8)-C(7)-H(7)   | 116.4      |

|                   |            |                     |            |
|-------------------|------------|---------------------|------------|
| C(13)-C(8)-C(9)   | 118.15(16) | C(22)-C(20)-C(21)   | 112.56(18) |
| C(13)-C(8)-C(7)   | 123.21(15) | C(20)-C(21)-H(21A)  | 109.5      |
| C(9)-C(8)-C(7)    | 118.64(16) | C(20)-C(21)-H(21B)  | 109.5      |
| C(10)-C(9)-C(8)   | 120.77(18) | H(21A)-C(21)-H(21B) | 109.5      |
| C(10)-C(9)-H(9)   | 119.6      | C(20)-C(21)-H(21C)  | 109.5      |
| C(8)-C(9)-H(9)    | 119.6      | H(21A)-C(21)-H(21C) | 109.5      |
| C(11)-C(10)-C(9)  | 120.62(17) | H(21B)-C(21)-H(21C) | 109.5      |
| C(11)-C(10)-H(10) | 119.7      | C(20)-C(22)-H(22A)  | 109.5      |
| C(9)-C(10)-H(10)  | 119.7      | C(20)-C(22)-H(22B)  | 109.5      |
| C(10)-C(11)-C(12) | 119.34(17) | H(22A)-C(22)-H(22B) | 109.5      |
| C(10)-C(11)-H(11) | 120.3      | C(20)-C(22)-H(22C)  | 109.5      |
| C(12)-C(11)-H(11) | 120.3      | H(22A)-C(22)-H(22C) | 109.5      |
| C(13)-C(12)-C(11) | 120.34(18) | H(22B)-C(22)-H(22C) | 109.5      |
| C(13)-C(12)-H(12) | 119.8      | C(20)-C(23)-H(23A)  | 109.5      |
| C(11)-C(12)-H(12) | 119.8      | C(20)-C(23)-H(23B)  | 109.5      |
| C(12)-C(13)-C(8)  | 120.79(17) | H(23A)-C(23)-H(23B) | 109.5      |
| C(12)-C(13)-H(13) | 119.6      | C(20)-C(23)-H(23C)  | 109.5      |
| C(8)-C(13)-H(13)  | 119.6      | H(23A)-C(23)-H(23C) | 109.5      |
| O(4)-C(20)-C(23)  | 101.83(14) | H(23B)-C(23)-H(23C) | 109.5      |
| O(4)-C(20)-C(22)  | 109.42(16) | C(19)-N(1)-N(2)     | 120.11(13) |
| C(23)-C(20)-C(22) | 111.46(19) | C(19)-N(1)-C(1)     | 117.61(13) |
| O(4)-C(20)-C(21)  | 110.26(14) | N(2)-N(1)-C(1)      | 117.61(12) |
| C(23)-C(20)-C(21) | 110.78(17) |                     |            |

---

Symmetry transformations used to generate equivalent atoms:  $-x, y+1/2, -z$

Table 4. Anisotropic displacement parameters ( $\text{\AA}^2 \times 10^3$ ) for xy001. The anisotropic displacement factor exponent takes the form:  $-2\pi^2 [ h^2 a^{*2} U^{11} + \dots + 2 h k a^* b^* U^{12} ]$

|       | $U^{11}$ | $U^{22}$ | $U^{33}$ | $U^{23}$ | $U^{13}$ | $U^{12}$ |
|-------|----------|----------|----------|----------|----------|----------|
| C(14) | 20(1)    | 19(1)    | 16(1)    | 1(1)     | 2(1)     | -2(1)    |
| C(15) | 20(1)    | 21(1)    | 22(1)    | 2(1)     | -4(1)    | 1(1)     |
| C(16) | 22(1)    | 31(1)    | 49(1)    | -12(1)   | 2(1)     | 3(1)     |
| C(17) | 42(1)    | 28(1)    | 26(1)    | 8(1)     | -7(1)    | -8(1)    |
| C(18) | 25(1)    | 26(1)    | 23(1)    | 1(1)     | -5(1)    | -2(1)    |
| C(19) | 19(1)    | 16(1)    | 19(1)    | 2(1)     | 2(1)     | 3(1)     |
| N(2)  | 20(1)    | 15(1)    | 18(1)    | -2(1)    | -3(1)    | -1(1)    |
| O(3)  | 25(1)    | 16(1)    | 26(1)    | -2(1)    | -2(1)    | 0(1)     |
| O(4)  | 19(1)    | 26(1)    | 20(1)    | -1(1)    | 4(1)     | -2(1)    |
| O(5)  | 23(1)    | 16(1)    | 21(1)    | 0(1)     | -5(1)    | 1(1)     |
| C(1)  | 20(1)    | 17(1)    | 18(1)    | 1(1)     | 2(1)     | 0(1)     |
| C(2)  | 24(1)    | 18(1)    | 23(1)    | -1(1)    | 5(1)     | -2(1)    |
| C(3)  | 29(1)    | 23(1)    | 28(1)    | -5(1)    | 9(1)     | -7(1)    |
| C(4)  | 22(1)    | 35(1)    | 25(1)    | -6(1)    | 3(1)     | -5(1)    |
| C(5)  | 19(1)    | 28(1)    | 16(1)    | -3(1)    | 4(1)     | 2(1)     |
| C(6)  | 18(1)    | 18(1)    | 19(1)    | -1(1)    | 0(1)     | 1(1)     |
| C(7)  | 21(1)    | 21(1)    | 20(1)    | 1(1)     | 0(1)     | 0(1)     |
| C(8)  | 16(1)    | 28(1)    | 18(1)    | 3(1)     | -1(1)    | 0(1)     |

|       |       |       |       |       |       |        |
|-------|-------|-------|-------|-------|-------|--------|
| C(9)  | 26(1) | 32(1) | 21(1) | 4(1)  | -1(1) | -5(1)  |
| C(10) | 26(1) | 49(1) | 17(1) | 7(1)  | -1(1) | -10(1) |
| C(11) | 22(1) | 54(1) | 16(1) | -5(1) | 1(1)  | -2(1)  |
| C(12) | 21(1) | 36(1) | 24(1) | -5(1) | -2(1) | 3(1)   |
| C(13) | 19(1) | 30(1) | 18(1) | 1(1)  | 0(1)  | 2(1)   |
| C(20) | 22(1) | 30(1) | 26(1) | -3(1) | 10(1) | 2(1)   |
| C(21) | 36(1) | 49(1) | 23(1) | 2(1)  | 12(1) | 7(1)   |
| C(22) | 49(1) | 32(1) | 58(1) | -4(1) | 24(1) | 12(1)  |
| C(23) | 26(1) | 69(2) | 42(1) | -8(1) | 14(1) | -8(1)  |
| N(1)  | 18(1) | 20(1) | 15(1) | -1(1) | 0(1)  | -2(1)  |
| O(1)  | 26(1) | 28(1) | 21(1) | 0(1)  | 0(1)  | 7(1)   |
| O(2)  | 21(1) | 27(1) | 19(1) | -3(1) | 1(1)  | 0(1)   |

---



Table 5. Hydrogen coordinates ( $\times 10^4$ ) and isotropic displacement parameters ( $\text{\AA}^2 \times 10^{-3}$ ) for xy001.

|        | x    | y    | z    | U(eq) |
|--------|------|------|------|-------|
| H(16A) | 8476 | 7736 | 5910 | 52    |
| H(16B) | 7732 | 6347 | 5900 | 52    |
| H(16C) | 8870 | 6667 | 6936 | 52    |
| H(17A) | 7094 | 6177 | 8479 | 49    |
| H(17B) | 6107 | 5896 | 7313 | 49    |
| H(17C) | 5750 | 6981 | 8275 | 49    |
| H(18A) | 7062 | 9059 | 8495 | 37    |
| H(18B) | 8129 | 9373 | 7568 | 37    |
| H(18C) | 8426 | 8281 | 8593 | 37    |
| H(2)   | 4471 | 9487 | 5360 | 22    |
| H(2A)  | 2695 | 5737 | 5501 | 26    |
| H(2B)  | 2783 | 5737 | 4064 | 26    |
| H(3A)  | 731  | 4801 | 4186 | 32    |
| H(3B)  | 421  | 5730 | 5300 | 32    |
| H(4A)  | 252  | 6419 | 2806 | 33    |
| H(4B)  | -685 | 6912 | 3802 | 33    |

|        |      |       |       |    |
|--------|------|-------|-------|----|
| H(6)   | 2030 | 9155  | 5958  | 22 |
| H(7)   | 1869 | 6614  | 6854  | 25 |
| H(9)   | 1297 | 6295  | 8860  | 32 |
| H(10)  | 872  | 7078  | 10748 | 37 |
| H(11)  | 800  | 9338  | 11120 | 37 |
| H(12)  | 1214 | 10827 | 9590  | 33 |
| H(13)  | 1682 | 10055 | 7705  | 27 |
| H(21A) | 4710 | 9542  | 823   | 54 |
| H(21B) | 3859 | 8224  | 628   | 54 |
| H(21C) | 5186 | 8386  | -13   | 54 |
| H(22A) | 5986 | 6116  | 2478  | 68 |
| H(22B) | 6058 | 6213  | 1051  | 68 |
| H(22C) | 4667 | 6124  | 1594  | 68 |
| H(23A) | 6805 | 9511  | 2084  | 68 |
| H(23B) | 7359 | 8348  | 1300  | 68 |
| H(23C) | 7329 | 8175  | 2725  | 68 |

---

(S)-di-*tert*-butyl 1-(2-oxo-1-phenylcyclohexyl)hydrazine-1,2-dicarboxylate (**2a**)

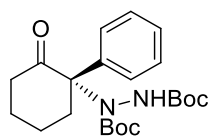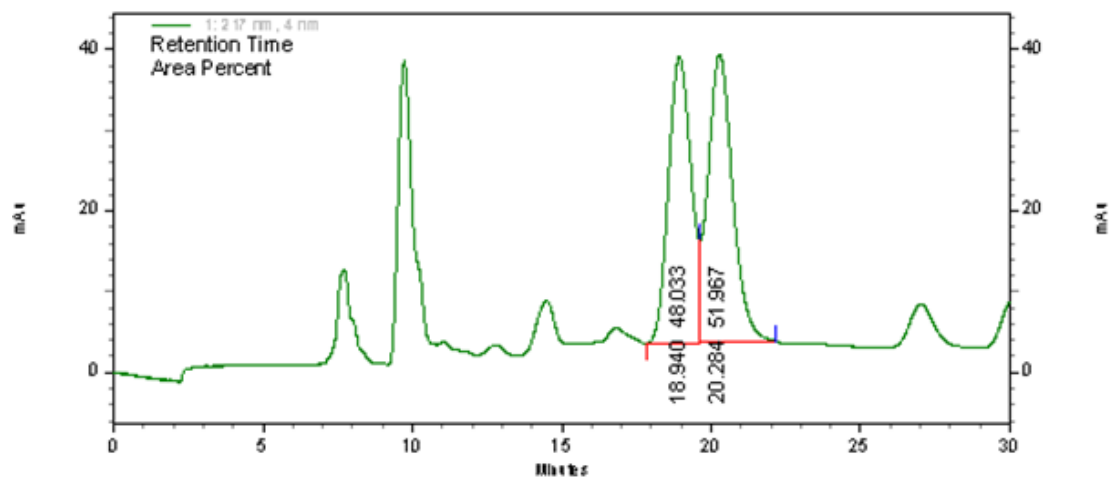

1: 217 nm, 4 nm

Results

| Pk # | Retention Time | Area Percent | Lambda Max |
|------|----------------|--------------|------------|
| 1    | 18.940         | 48.033       | 202        |
| 2    | 20.284         | 51.967       | 202        |

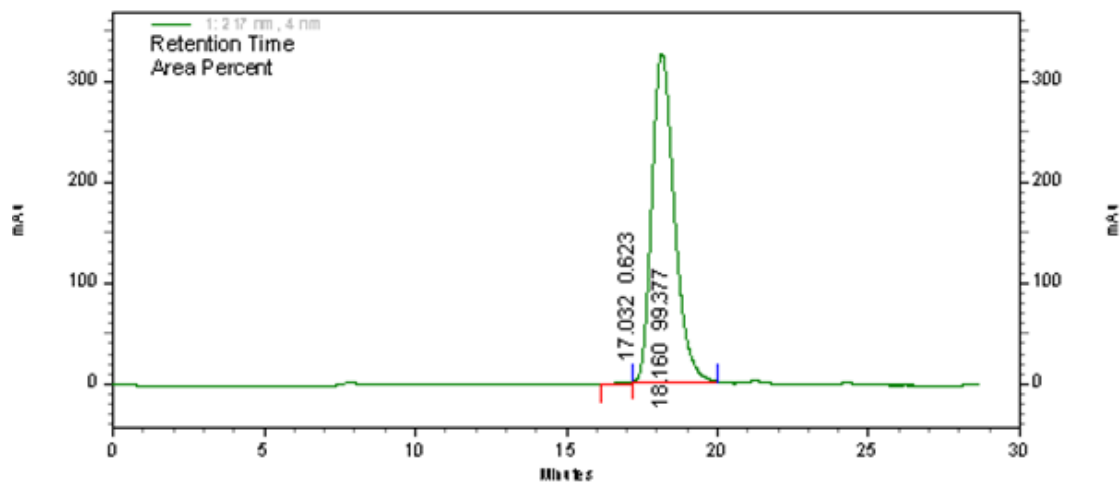

1: 217 nm, 4 nm

Results

| Pk # | Retention Time | Area Percent | Lambda Max |
|------|----------------|--------------|------------|
| 1    | 17.032         | 0.623        | 667        |
| 2    | 18.160         | 99.377       | 190        |

(S)-di-tert-butyl 1-(2-oxo-1-(p-tolyl)cyclohexyl)hydrazine-1,2-dicarboxylate (**2b**)

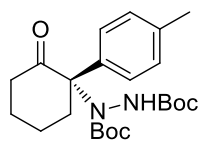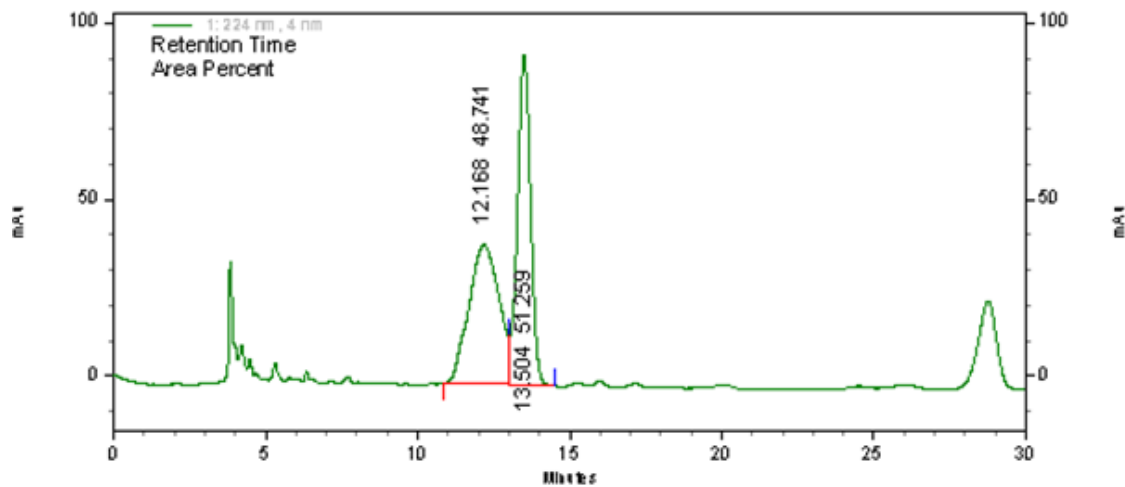

1: 224 nm, 4 nm

Results

| Pk # | Retention Time | Area Percent | Lambda Max |
|------|----------------|--------------|------------|
| 1    | 12.168         | 48.741       | 205        |
| 2    | 13.504         | 51.259       | 205        |

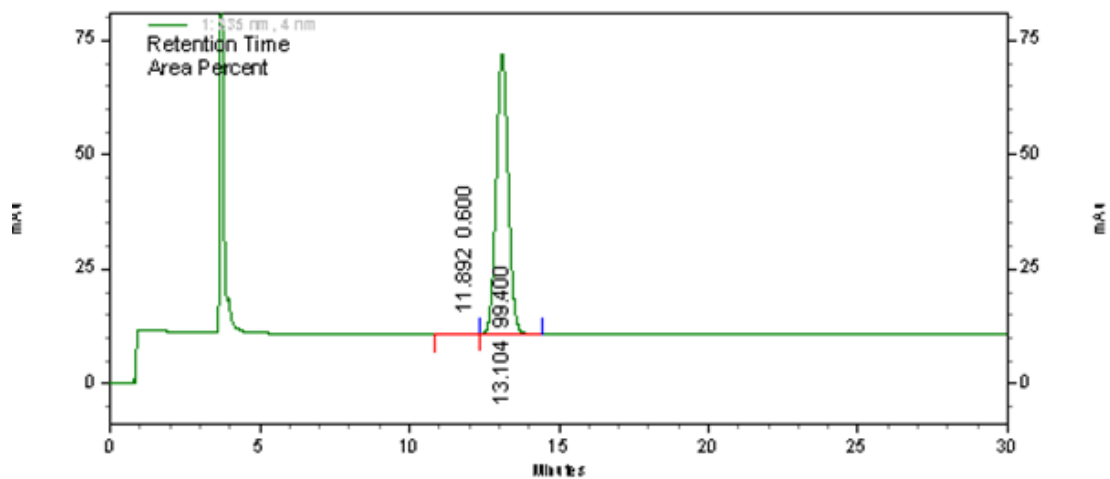

1: 235 nm, 4 nm

Results

| Pk # | Retention Time | Area Percent | Lambda Max |
|------|----------------|--------------|------------|
| 1    | 11.892         | 0.600        | 205        |
| 2    | 13.104         | 99.400       | 205        |

(S)-di-tert-butyl 1-(1-(naphthalen-2-yl)-2-oxocyclohexyl)hydrazine-1,2-dicarboxylate (**2c**)

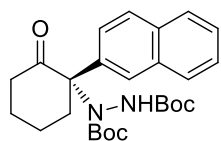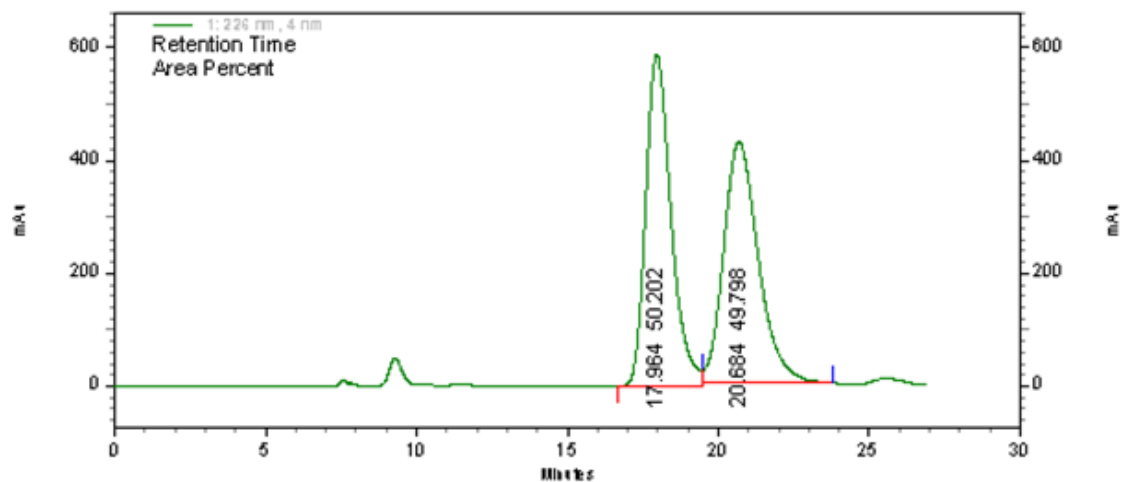

1: 226 nm, 4 nm

Results

| Pk # | Retention Time | Area Percent | Lambda Max |
|------|----------------|--------------|------------|
| 1    | 17.964         | 50.202       | 224        |
| 2    | 20.684         | 49.798       | 224        |

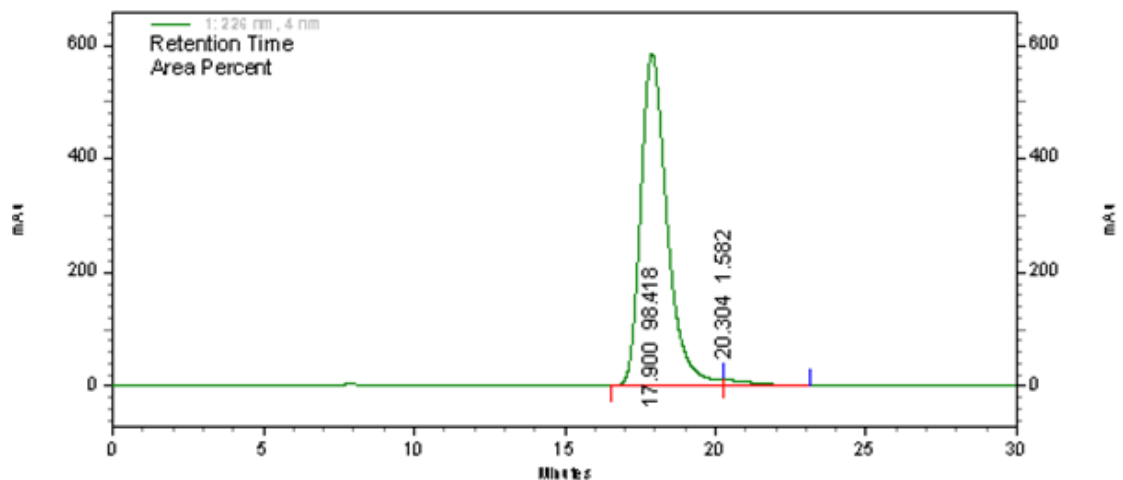

1: 226 nm, 4 nm

Results

| Pk # | Retention Time | Area Percent | Lambda Max |
|------|----------------|--------------|------------|
| 1    | 17.900         | 98.418       | 224        |
| 2    | 20.304         | 1.582        | 667        |

(S)-di-tert-butyl 1-(1-(benzo[d][1,3]dioxol-5-yl)-2-oxocyclohexyl)hydrazine-1,2-dicarboxylate  
(2d)

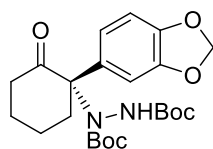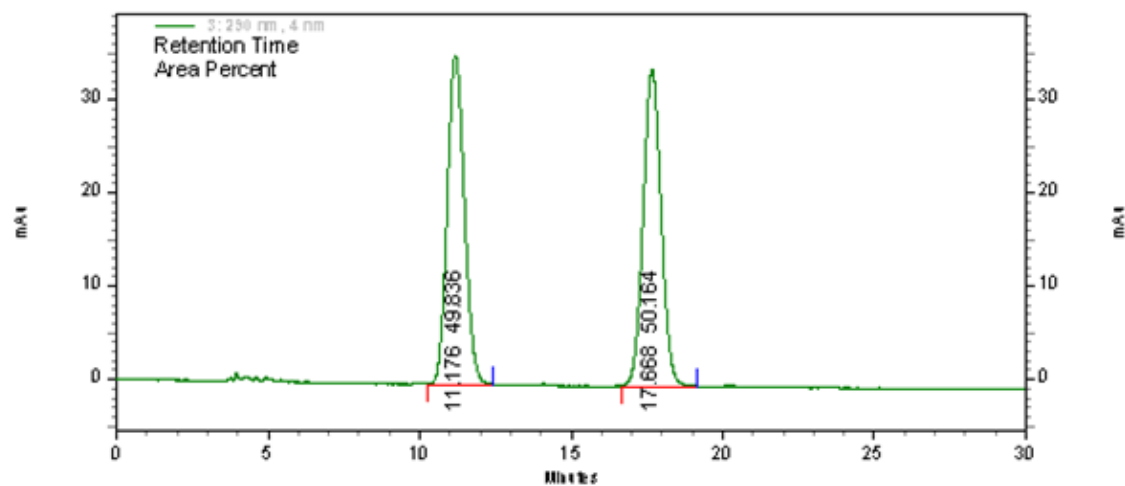

3: 290 nm, 4 nm  
Results

| Pk # | Retention Time | Area Percent | Lambda Max |
|------|----------------|--------------|------------|
| 1    | 11.176         | 49.836       | 206        |
| 2    | 17.668         | 50.164       | 206        |

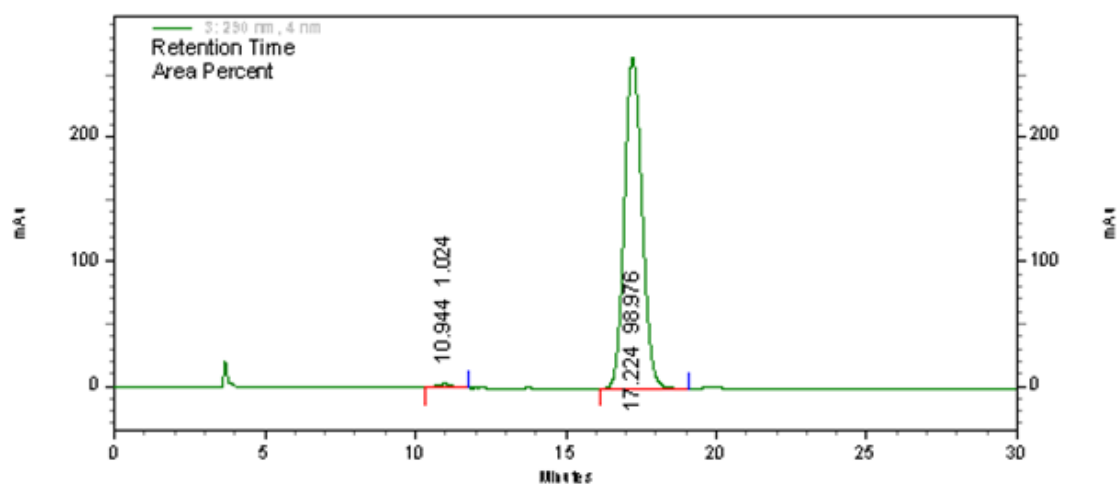

3: 290 nm, 4 nm  
Results

| Pk # | Retention Time | Area Percent | Lambda Max |
|------|----------------|--------------|------------|
| 1    | 10.944         | 1.024        | 206        |
| 2    | 17.224         | 98.976       | 193        |

(S)-di-tert-butyl 1-(1-(3-methoxyphenyl)-2-oxocyclohexyl)hydrazine-1,2-dicarboxylate (**2e**)

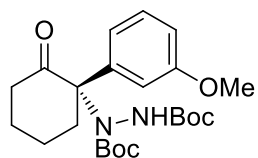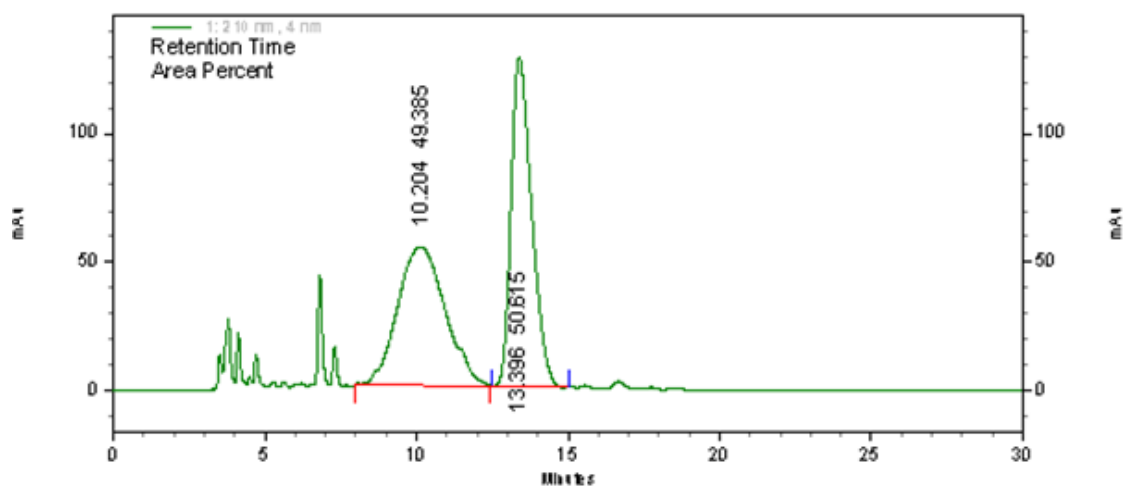

1: 210 nm, 4 nm

Results

| Pk # | Retention Time | Area Percent | Lambda Max |
|------|----------------|--------------|------------|
| 1    | 10.204         | 49.385       | 206        |
| 2    | 13.396         | 50.615       | 206        |

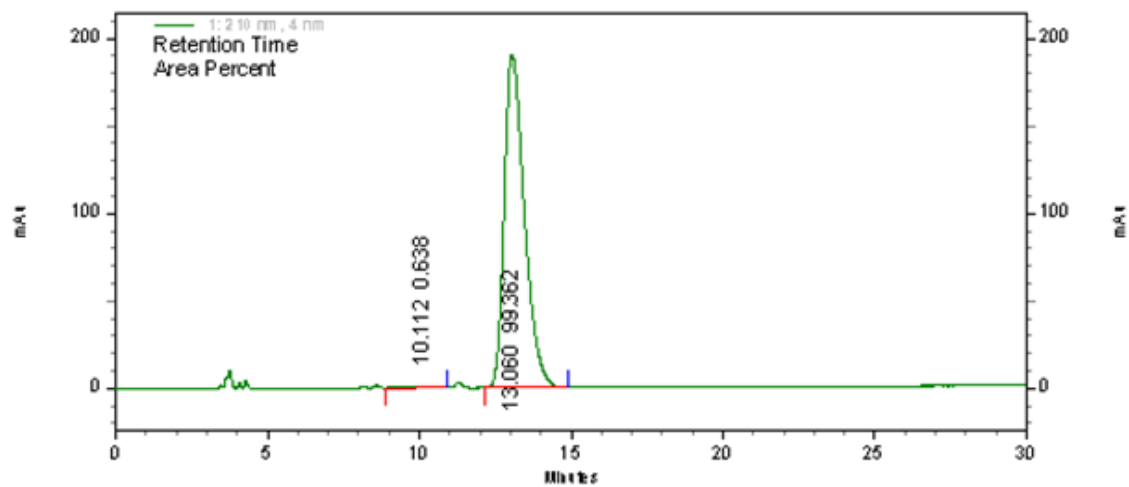

1: 210 nm, 4 nm

Results

| Pk # | Retention Time | Area Percent | Lambda Max |
|------|----------------|--------------|------------|
| 1    | 10.112         | 0.638        | 206        |
| 2    | 13.060         | 99.362       | 206        |

(S)-di-tert-butyl 1-(1-(4-bromophenyl)-2-oxocyclohexyl)hydrazine-1,2-dicarboxylate (**2f**)

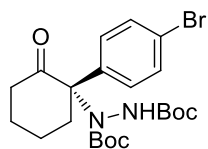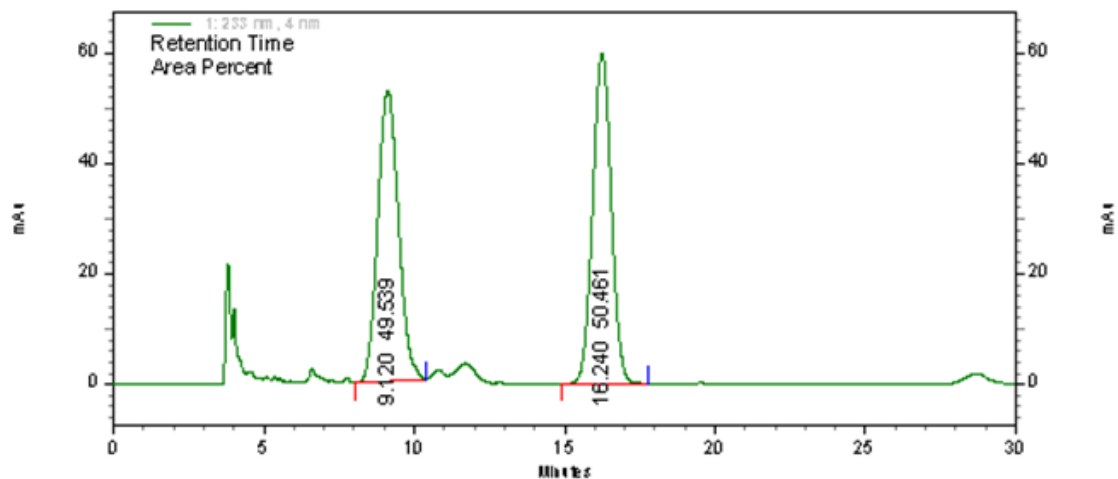

1: 233 nm, 4 nm

Results

| Pk # | Retention Time | Area Percent | Lambda Max |
|------|----------------|--------------|------------|
| 1    | 9.120          | 49.539       | 204        |
| 2    | 16.240         | 50.461       | 204        |

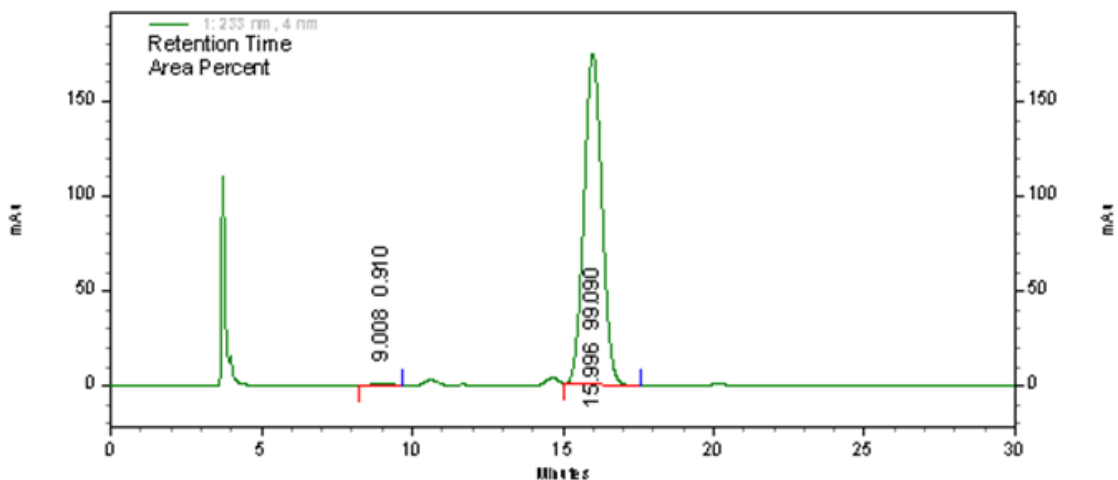

1: 233 nm, 4 nm

Results

| Pk # | Retention Time | Area Percent | Lambda Max |
|------|----------------|--------------|------------|
| 1    | 9.008          | 0.910        | 662        |
| 2    | 15.996         | 99.090       | 202        |



(*S*)-di-*tert*-butyl 1-(2-oxo-1-(4-(trifluoromethyl)phenyl)cyclohexyl)hydrazine-1,2-dicarboxylate  
(2g)

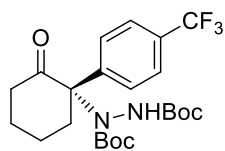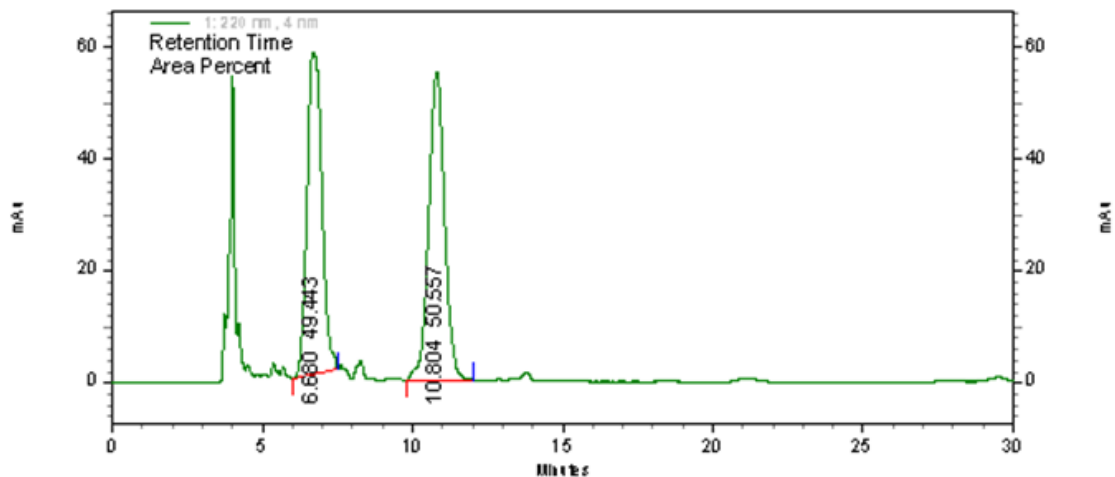

1: 220 nm, 4 nm

Results

| Pk # | Retention Time | Area Percent | Lambda Max |
|------|----------------|--------------|------------|
| 1    | 6.680          | 49.443       | 263        |
| 2    | 10.804         | 50.557       | 662        |

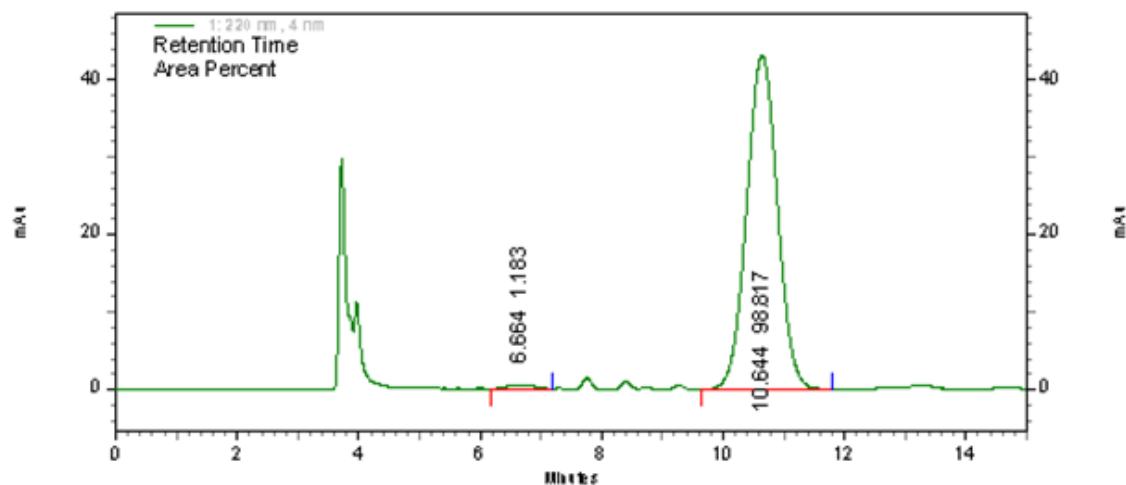

1: 220 nm, 4 nm

Results

| Pk # | Retention Time | Area Percent | Lambda Max |
|------|----------------|--------------|------------|
| 1    | 6.664          | 1.183        | 647        |
| 2    | 10.644         | 98.817       | 263        |

(*S*)-di-*tert*-butyl 1-(1-(4-(*tert*-butoxycarbonyl)phenyl)-2-oxocyclohexyl)hydrazine-1,2-dicarboxylate (**2h**)

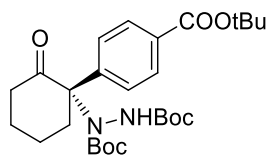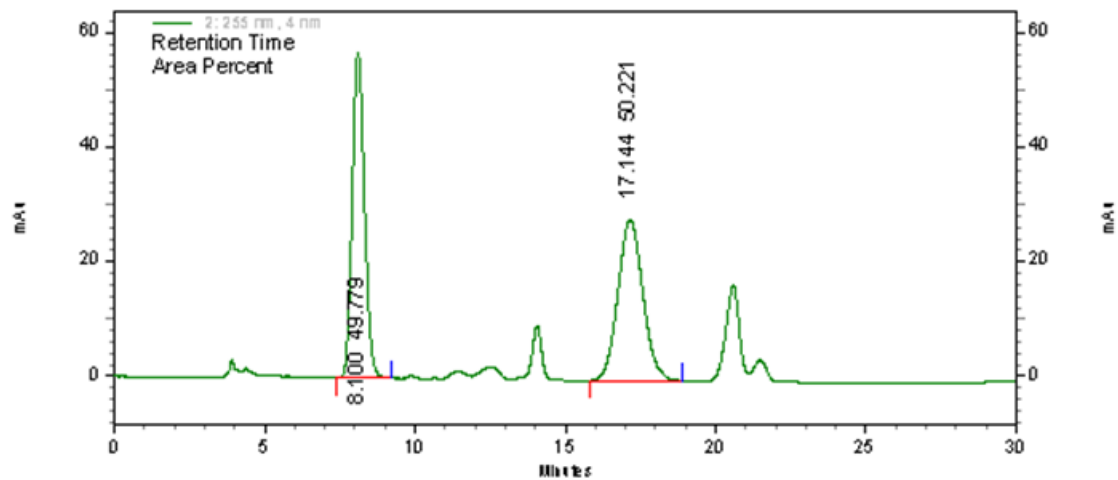

2: 255 nm, 4 nm

Results

| Pk # | Retention Time | Area Percent | Lambda Max |
|------|----------------|--------------|------------|
| 1    | 8.100          | 49.779       | 205        |
| 2    | 17.144         | 50.221       | 237        |

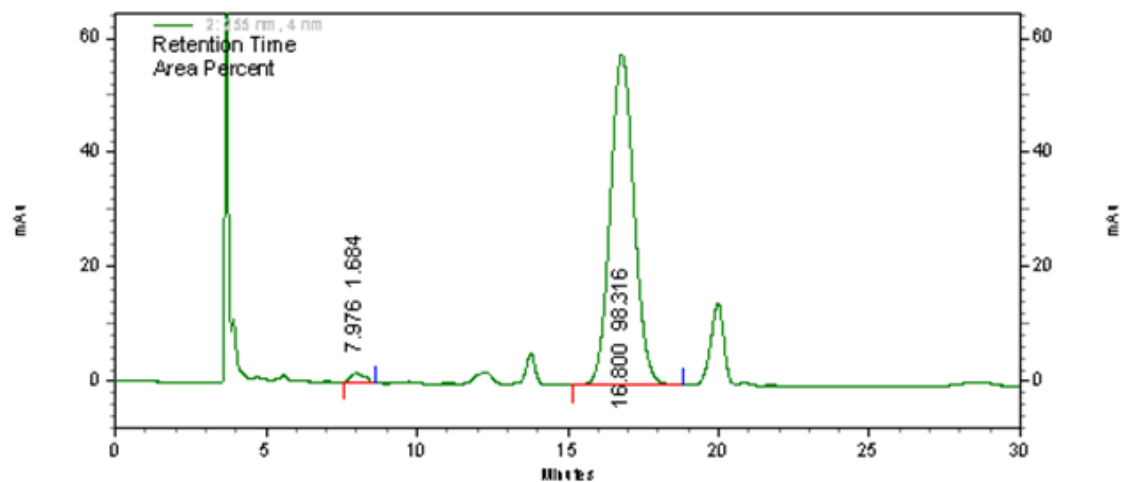

2: 255 nm, 4 nm

Results

| Pk # | Retention Time | Area Percent | Lambda Max |
|------|----------------|--------------|------------|
| 1    | 7.976          | 1.684        | 239        |
| 2    | 16.800         | 98.316       | 205        |

(S)-di-tert-butyl 1-(2-oxo-1-(o-tolyl)cyclohexyl)hydrazine-1,2-dicarboxylate (**2i**)

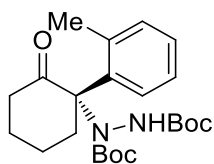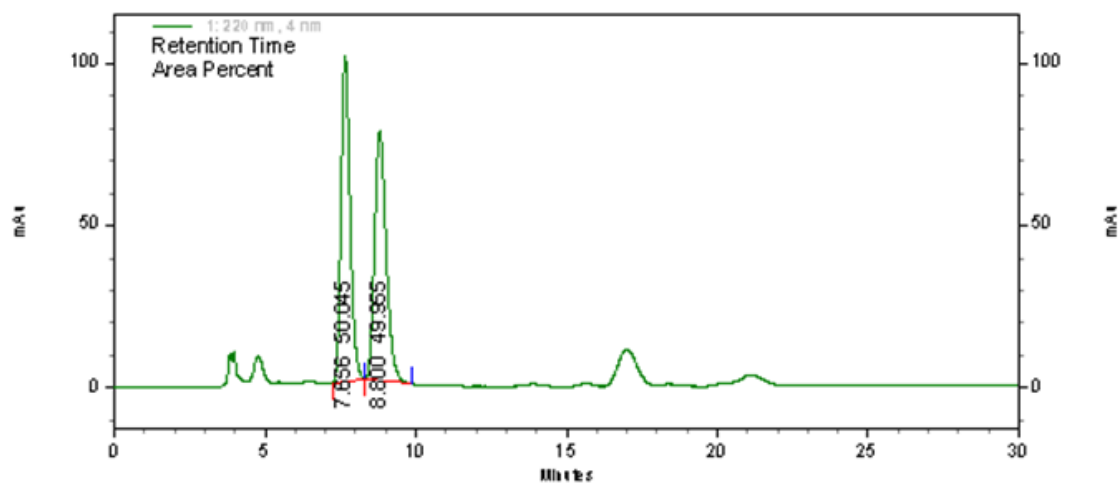

1: 220 nm, 4 nm

Results

| Pk # | Retention Time | Area Percent | Lambda Max |
|------|----------------|--------------|------------|
| 1    | 7.656          | 50.045       | 667        |
| 2    | 8.800          | 49.955       | 668        |

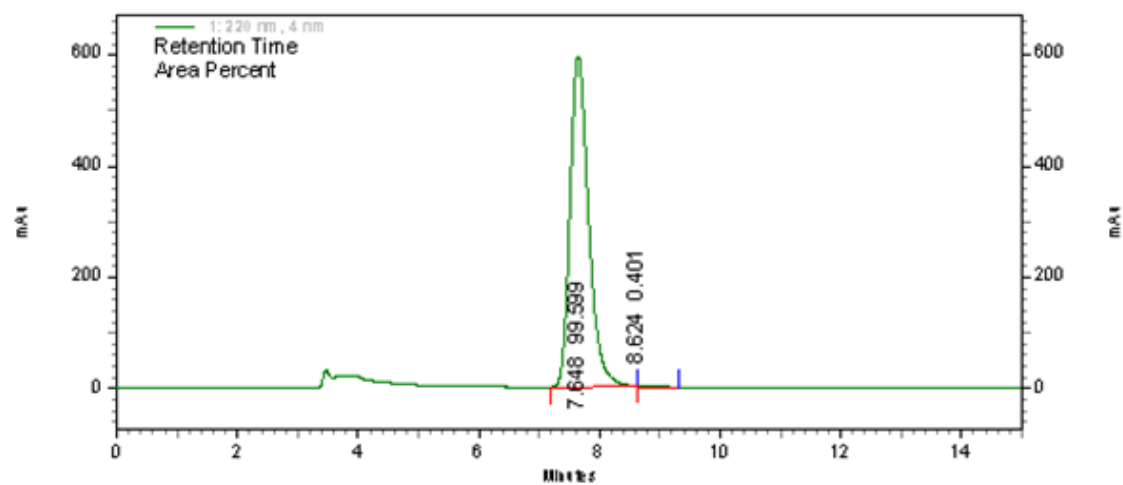

1: 220 nm, 4 nm

Results

| Pk # | Retention Time | Area Percent | Lambda Max |
|------|----------------|--------------|------------|
| 1    | 7.648          | 99.599       | 198        |
| 2    | 8.624          | 0.401        | 664        |

(S)-di-tert-butyl 1-(1-(2-chlorophenyl)-2-oxocyclohexyl)hydrazine-1,2-dicarboxylate (**2j**)

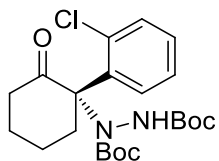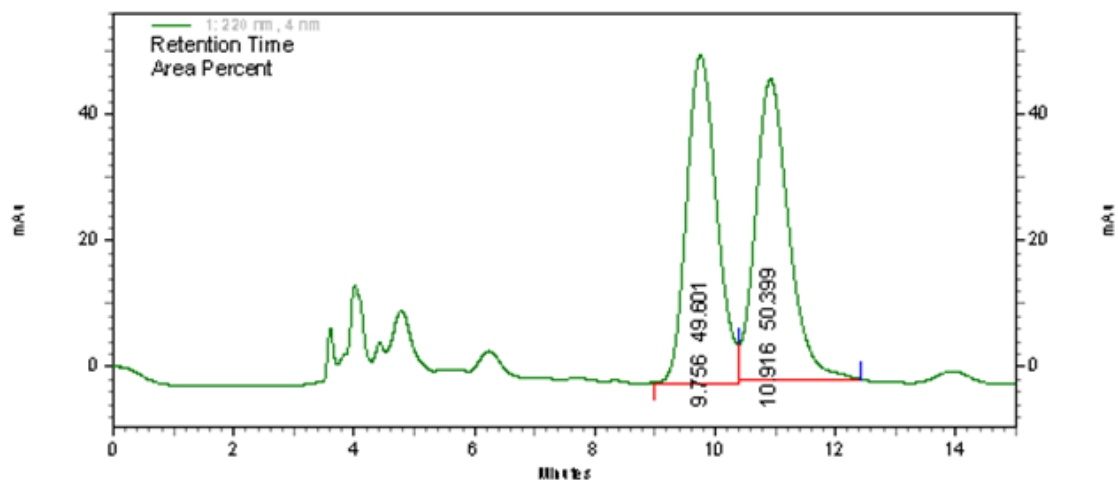

1: 220 nm, 4 nm

Results

| Pk # | Retention Time | Area Percent | Lambda Max |
|------|----------------|--------------|------------|
| 1    | 9.756          | 49.601       | 202        |
| 2    | 10.916         | 50.399       | 203        |

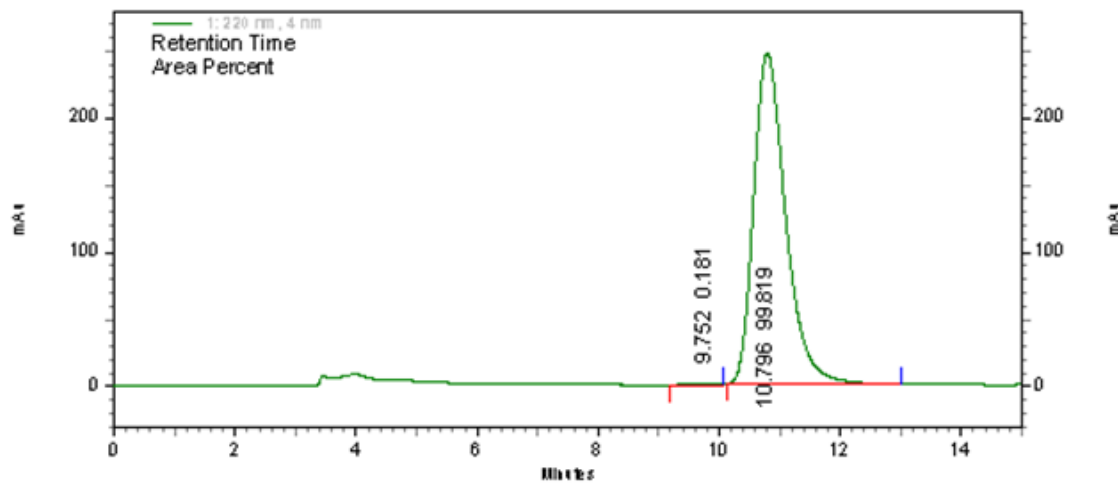

1: 220 nm, 4 nm

Results

| Pk # | Retention Time | Area Percent | Lambda Max |
|------|----------------|--------------|------------|
| 1    | 9.752          | 0.181        | 664        |
| 2    | 10.796         | 99.819       | 664        |

(S)-di-tert-butyl 1-(2-oxo-1-phenylcyclopentyl)hydrazine-1,2-dicarboxylate (**2k**)

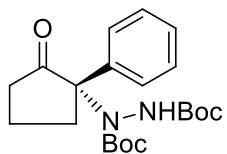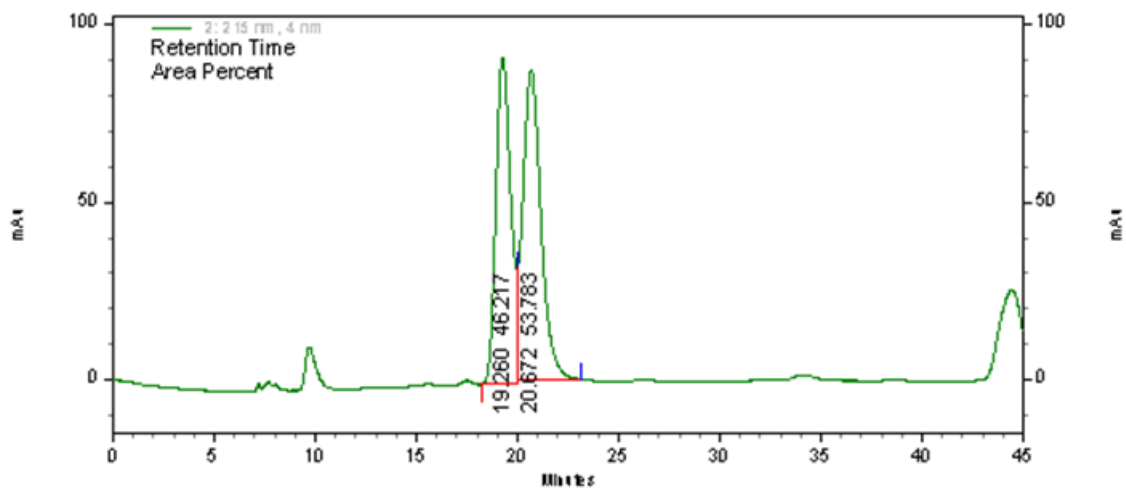

2: 215 nm, 4 nm

Results

| Pk # | Retention Time | Area Percent | Lambda Max |
|------|----------------|--------------|------------|
| 1    | 19.260         | 46.217       | 210        |
| 2    | 20.672         | 53.783       | 661        |

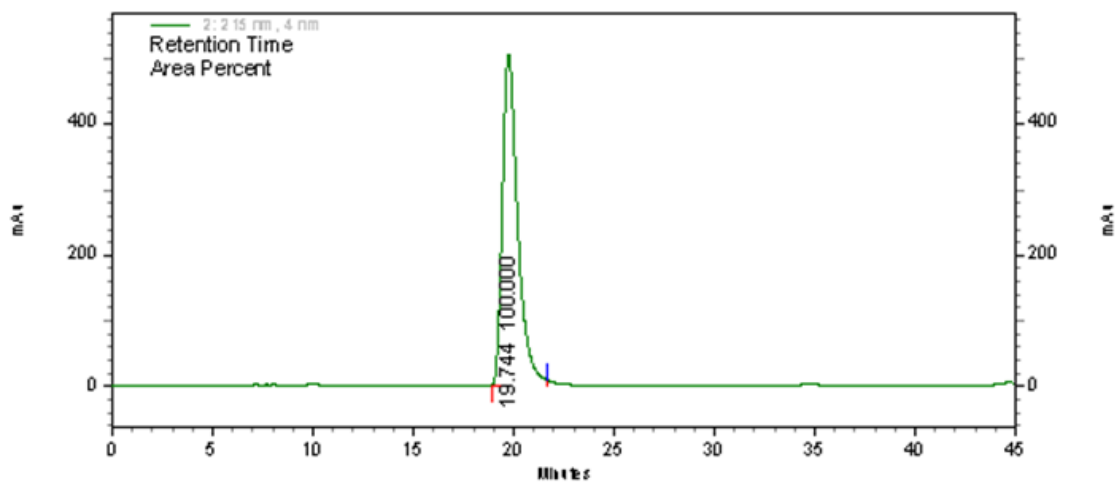

2: 215 nm, 4 nm

Results

| Pk # | Retention Time | Area Percent | Lambda Max |
|------|----------------|--------------|------------|
| 1    | 19.744         | 100.000      | 193        |

(*R*)-di-*tert*-butyl 1-(4-oxo-3-phenyltetrahydro-2H-pyran-3-yl)hydrazine-1,2-dicarboxylate (**2I**)

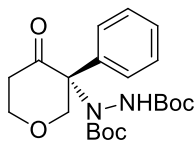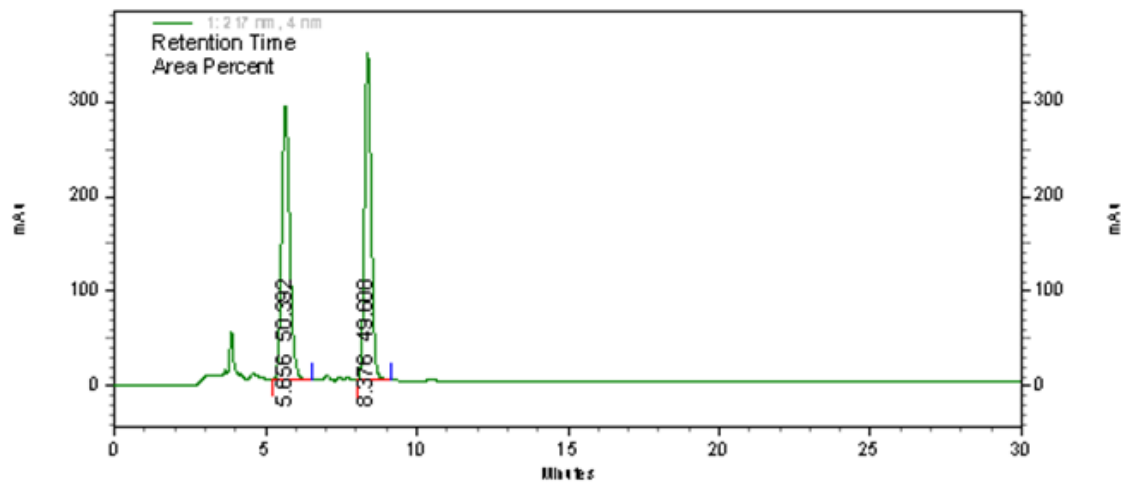

1: 217 nm, 4 nm

Results

| Pk # | Retention Time | Area Percent | Lambda Max |
|------|----------------|--------------|------------|
| 1    | 5.656          | 50.392       | 206        |
| 2    | 8.376          | 49.608       | 206        |

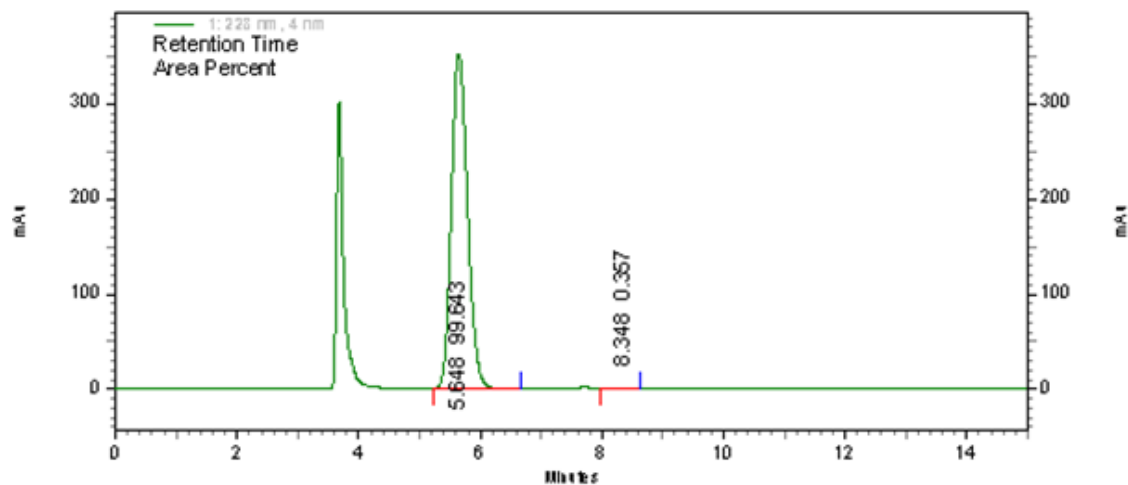

1: 228 nm, 4 nm

Results

| Pk # | Retention Time | Area Percent | Lambda Max |
|------|----------------|--------------|------------|
| 1    | 5.648          | 99.643       | 198        |
| 2    | 8.348          | 0.357        | 664        |

(*R*)-di-*tert*-butyl 1-(1-(*tert*-butoxycarbonyl)-4-oxo-3-phenylpiperidin-3-yl)hydrazine-1,2-dicarboxylate (**2m**)

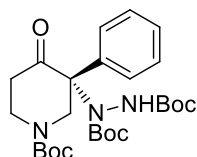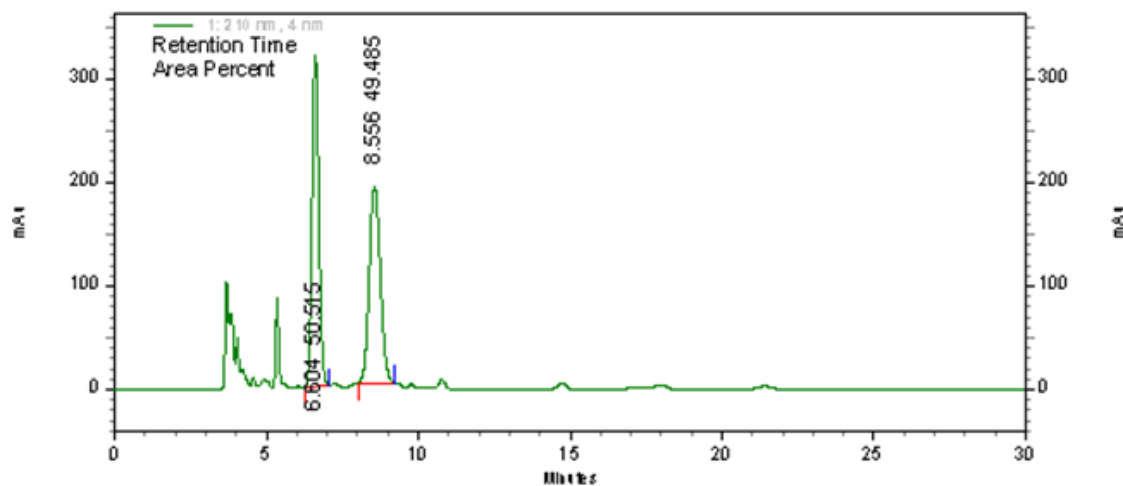

1: 210 nm, 4 nm

Results

| Pk # | Retention Time | Area Percent | Lambda Max |
|------|----------------|--------------|------------|
| 1    | 6.604          | 50.515       | 206        |
| 2    | 8.556          | 49.485       | 206        |

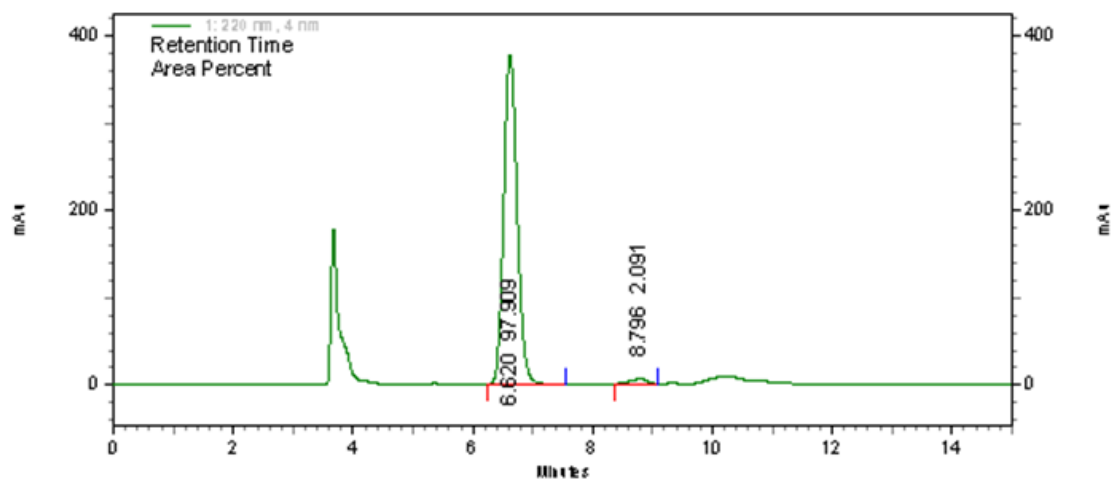

1: 220 nm, 4 nm

Results

| Pk # | Retention Time | Area Percent | Lambda Max |
|------|----------------|--------------|------------|
| 1    | 6.620          | 97.909       | 195        |
| 2    | 8.796          | 2.091        | 662        |

(*S,E*)-di-*tert*-butyl 1-(2-oxo-1-styrylcyclohexyl)hydrazine-1,2-dicarboxylate (**2n**)

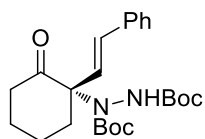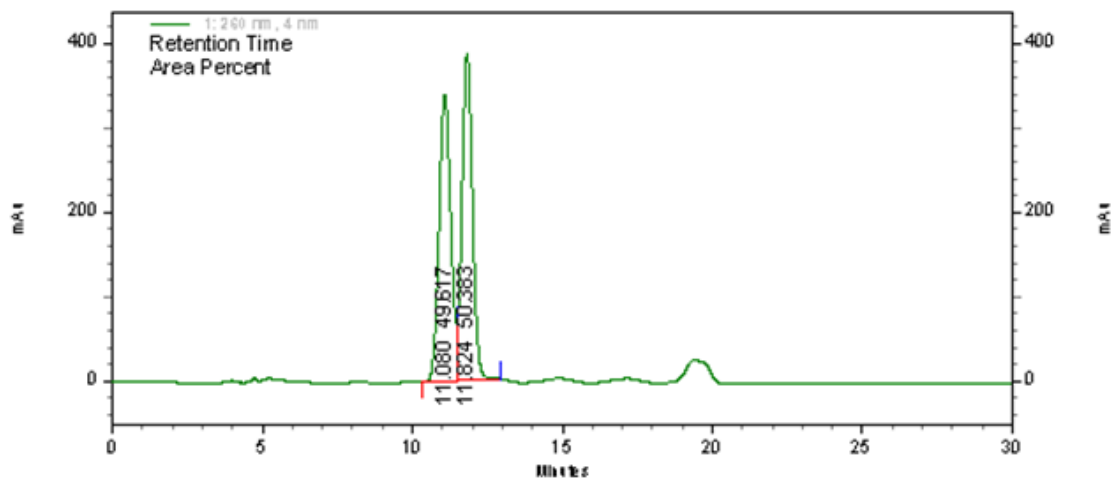

1: 260 nm, 4 nm

Results

| Pk # | Retention Time | Area Percent | Lambda Max |
|------|----------------|--------------|------------|
| 1    | 11.080         | 49.617       | 207        |
| 2    | 11.824         | 50.383       | 207        |

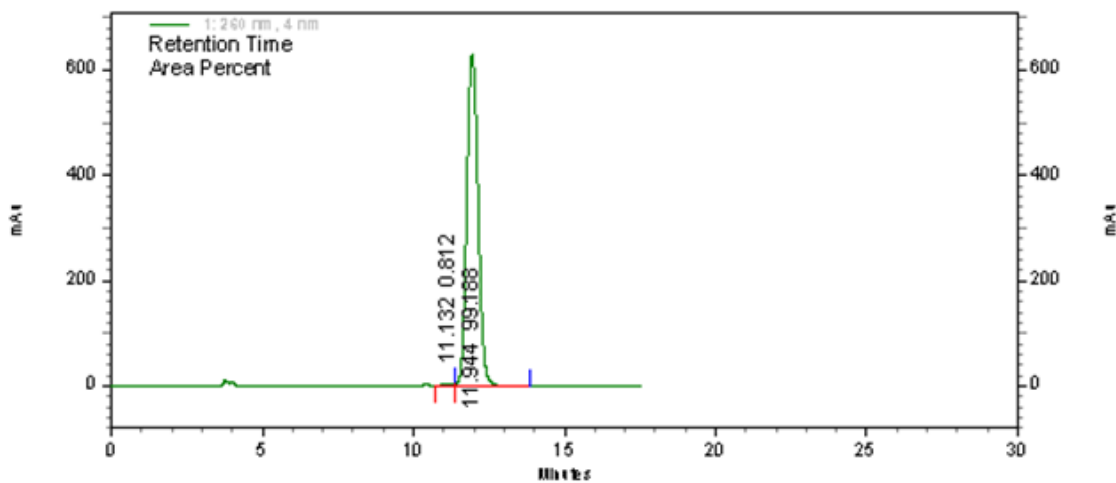

1: 260 nm, 4 nm

Results

| Pk # | Retention Time | Area Percent | Lambda Max |
|------|----------------|--------------|------------|
| 1    | 11.132         | 0.812        | 208        |
| 2    | 11.944         | 99.188       | 193        |



(S)-di-tert-butyl 1-(2-oxo-1-vinylcyclohexyl)hydrazine-1,2-dicarboxylate (**2o**)

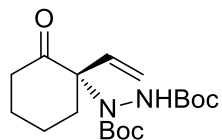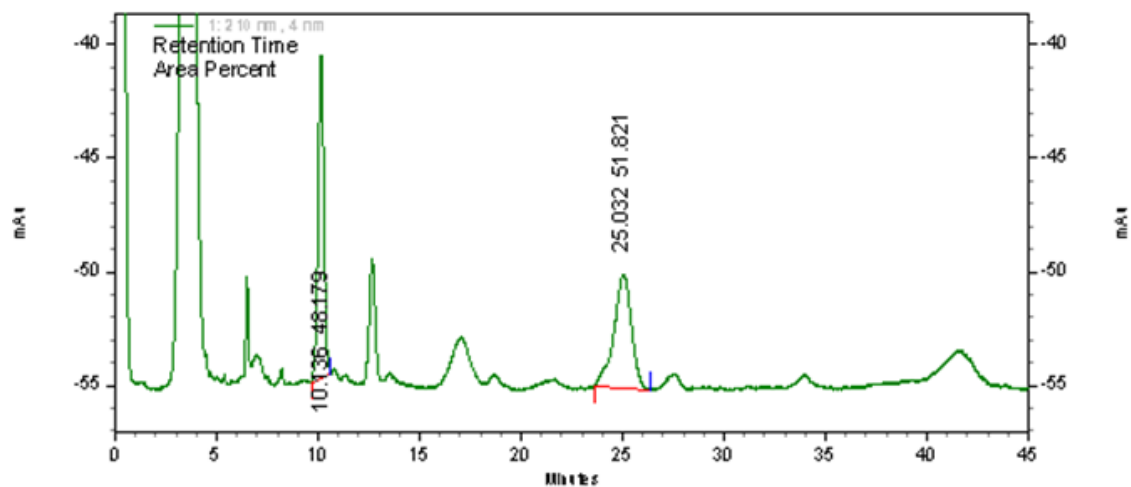

1: 210 nm, 4 nm

Results

| Pk # | Retention Time | Area Percent | Lambda Max |
|------|----------------|--------------|------------|
| 1    | 10.136         | 48.179       | 662        |
| 2    | 25.032         | 51.821       | 675        |

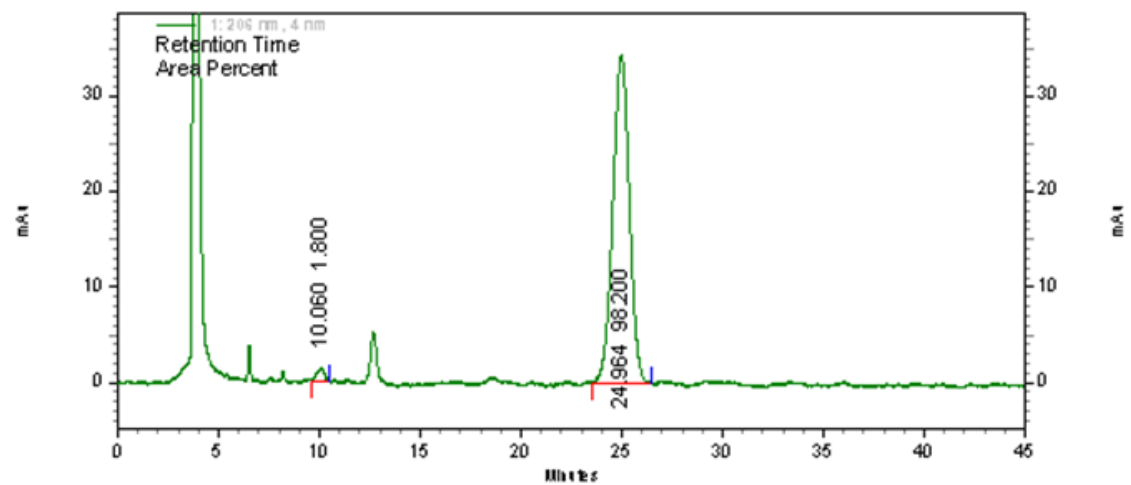

1: 206 nm, 4 nm

Results

| Pk # | Retention Time | Area Percent | Lambda Max |
|------|----------------|--------------|------------|
| 1    | 10.060         | 1.800        | 660        |
| 2    | 24.964         | 98.200       | 205        |

(*S,Z*)-di-*tert*-butyl 1-(2-oxo-1-(prop-1-en-1-yl)cyclohexyl)hydrazine-1,2-dicarboxylate (**2p**)

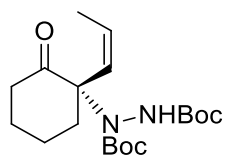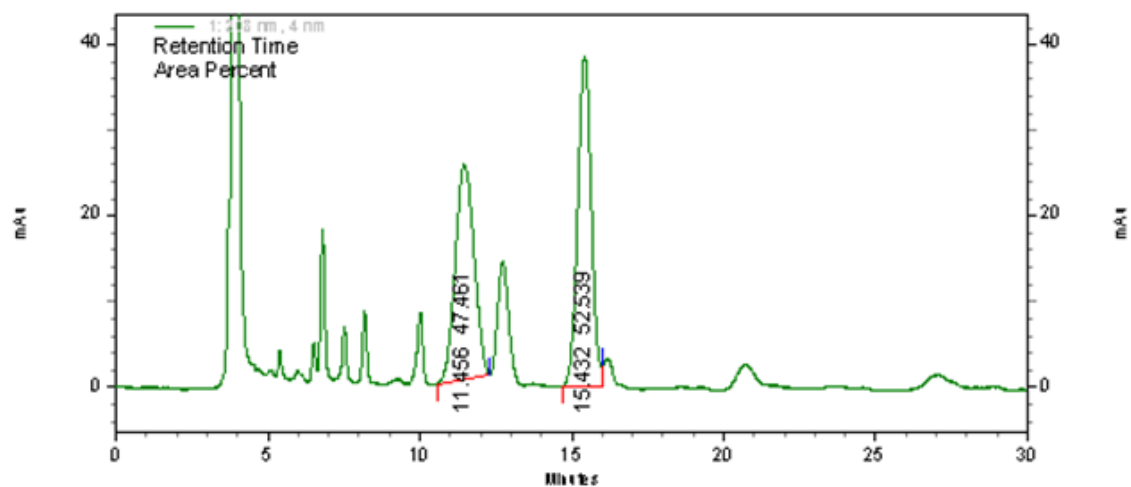

1: 208 nm, 4 nm

Results

| Pk # | Retention Time | Area Percent | Lambda Max |
|------|----------------|--------------|------------|
| 1    | 11.456         | 47.461       | 205        |
| 2    | 15.432         | 52.539       | 664        |

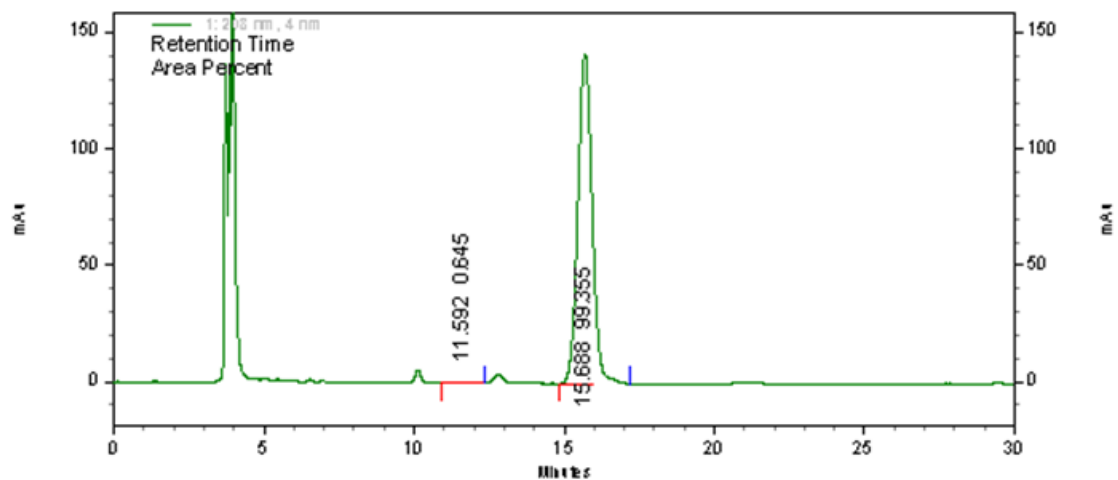

1: 208 nm, 4 nm

Results

| Pk # | Retention Time | Area Percent | Lambda Max |
|------|----------------|--------------|------------|
| 1    | 11.592         | 0.645        | 663        |
| 2    | 15.688         | 99.355       | 205        |

(*S,Z*)-di-*tert*-butyl 1-(2-oxo-1-styrylcyclohexyl)hydrazine-1,2-dicarboxylate (**2q**)

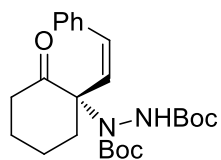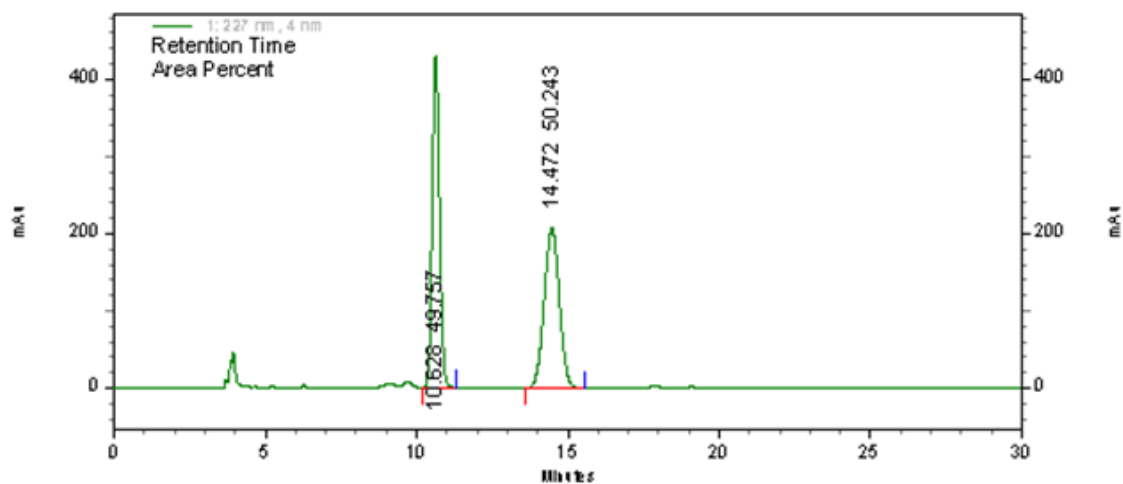

1: 227 nm, 4 nm

Results

| Pk # | Retention Time | Area Percent | Lambda Max |
|------|----------------|--------------|------------|
| 1    | 10.628         | 49.757       | 192        |
| 2    | 14.472         | 50.243       | 206        |

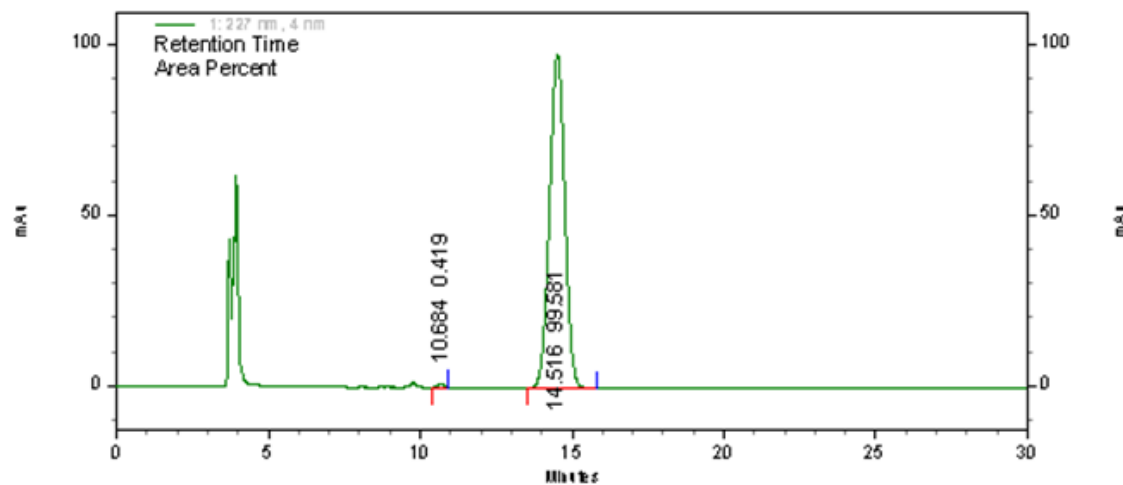

1: 227 nm, 4 nm

Results

| Pk # | Retention Time | Area Percent | Lambda Max |
|------|----------------|--------------|------------|
| 1    | 10.684         | 0.419        | 206        |
| 2    | 14.516         | 99.581       | 206        |

(*S*)-di-*tert*-butyl 1-(2-oxo-[1,1'-bi(cyclohexan)]-1'-en-1-yl)hydrazine-1,2-dicarboxylate (**2r**)

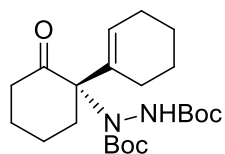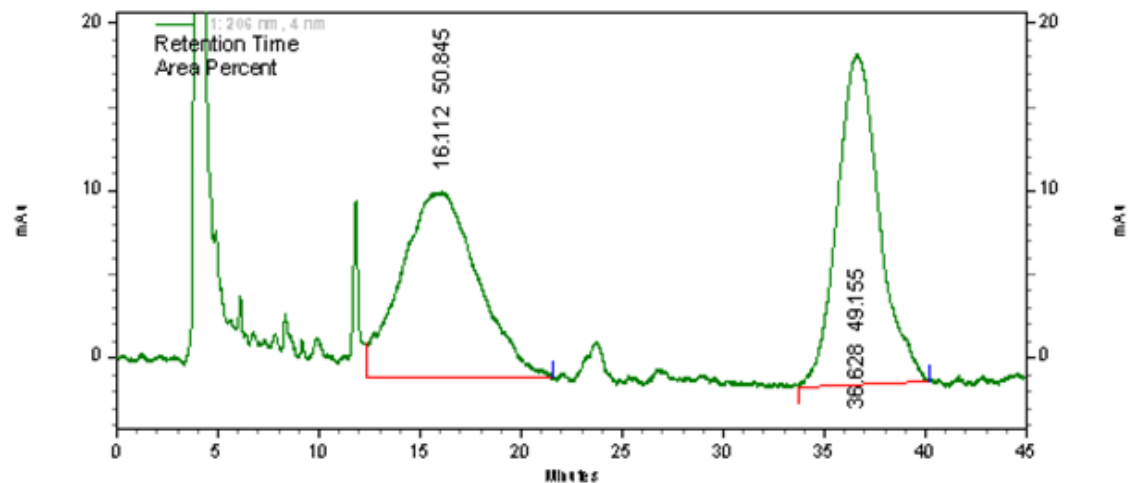

1: 206 nm, 4 nm

Results

| Pk # | Retention Time | Area Percent | Lambda Max |
|------|----------------|--------------|------------|
| 1    | 16.112         | 50.845       | 674        |
| 2    | 36.628         | 49.155       | 675        |

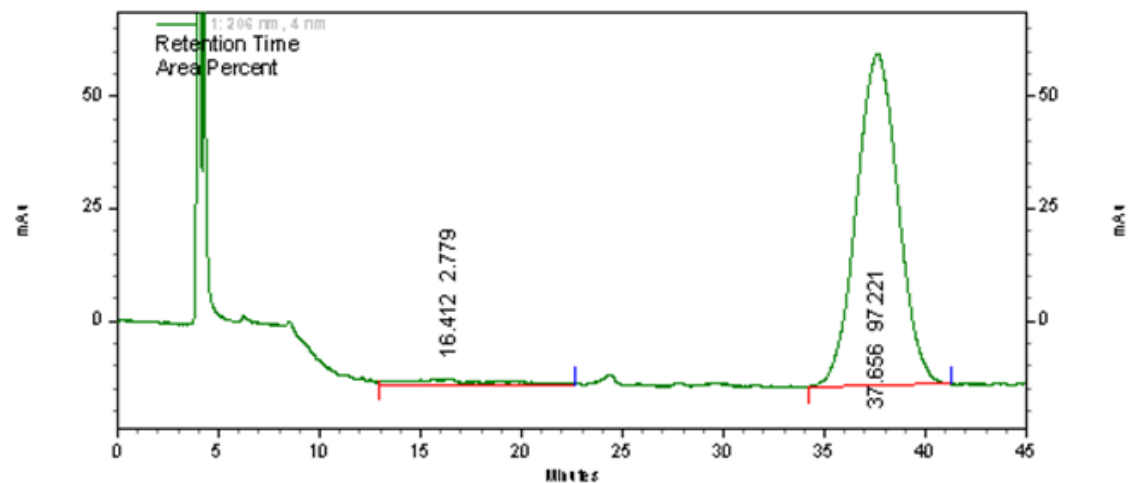

1: 206 nm, 4 nm

Results

| Pk # | Retention Time | Area Percent | Lambda Max |
|------|----------------|--------------|------------|
| 1    | 16.412         | 2.779        | 667        |
| 2    | 37.656         | 97.221       | 668        |

(*S,E*)-di-*tert*-butyl 1-(8-oxo-7-styryl-1,4-dioxaspiro[4.5]decan-7-yl)hydrazine-1,2-dicarboxylate  
(2s)

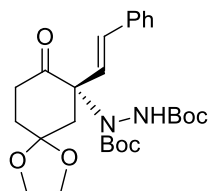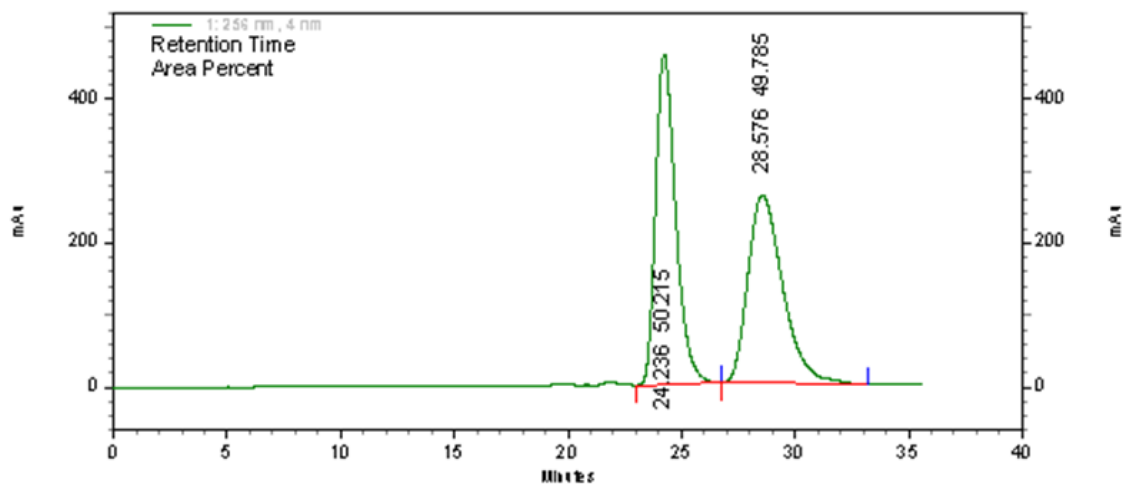

1: 256 nm, 4 nm

Results

| Pk # | Retention Time | Area Percent | Lambda Max |
|------|----------------|--------------|------------|
| 1    | 24.236         | 50.215       | 193        |
| 2    | 28.576         | 49.785       | 190        |

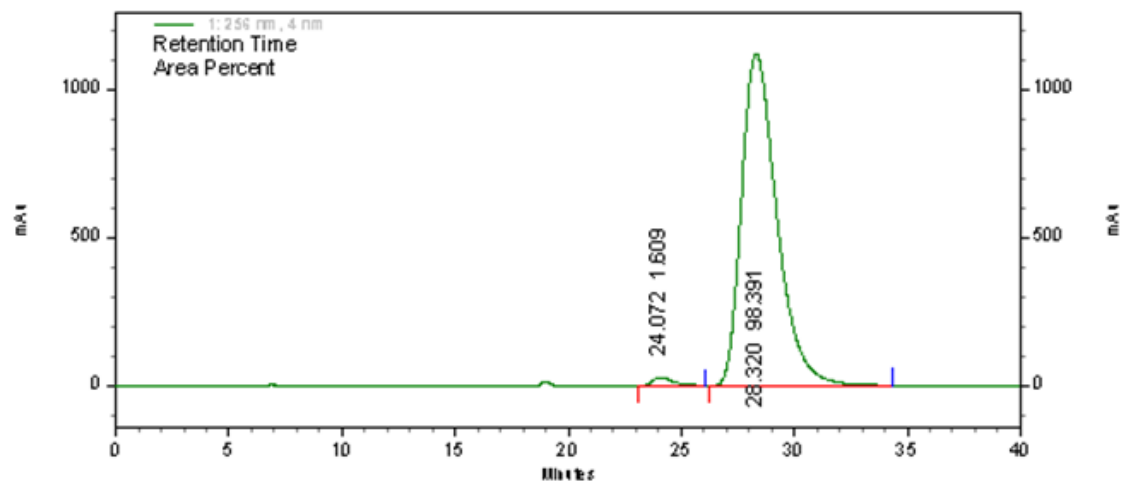

1: 256 nm, 4 nm

Results

| Pk # | Retention Time | Area Percent | Lambda Max |
|------|----------------|--------------|------------|
| 1    | 24.072         | 1.609        | 666        |
| 2    | 28.320         | 98.391       | 199        |

(*S,E*)-di-*tert*-butyl 1-(5,5-dimethyl-2-oxo-1-styrylcyclohexyl)hydrazine-1,2-dicarboxylate (**2t**)

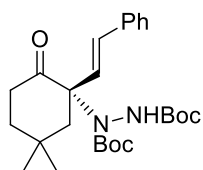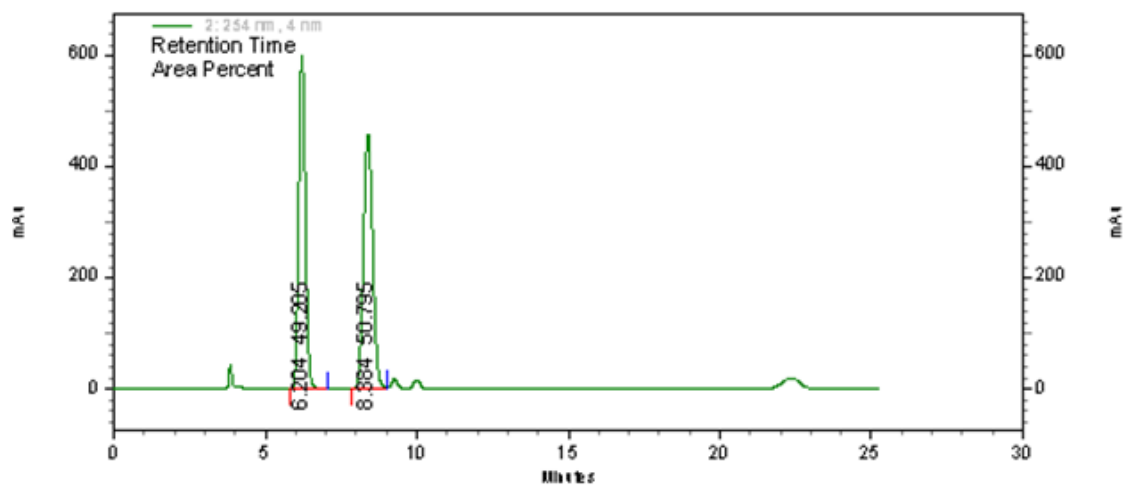

2: 254 nm, 4 nm

Results

| Pk # | Retention Time | Area Percent | Lambda Max |
|------|----------------|--------------|------------|
| 1    | 6.204          | 49.205       | 190        |
| 2    | 8.384          | 50.795       | 207        |

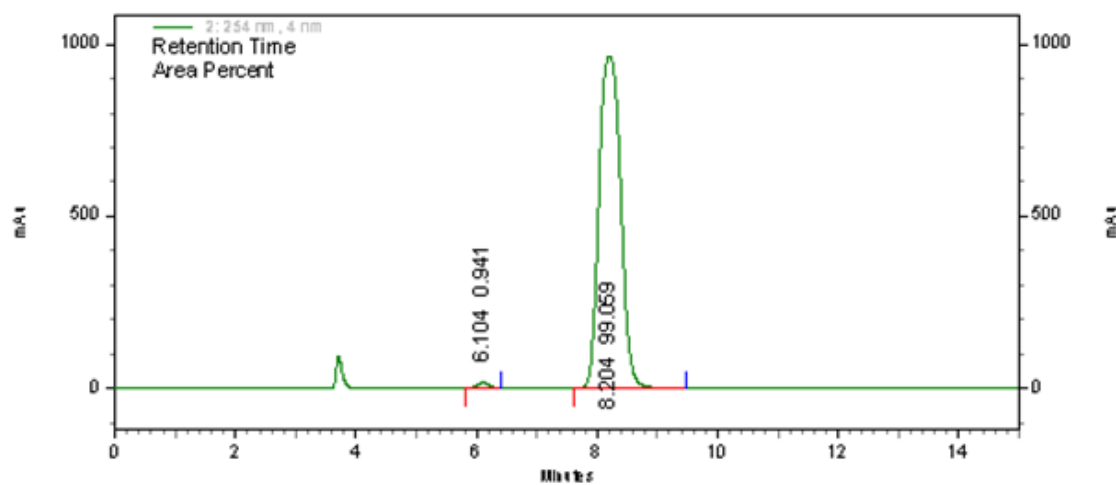

2: 254 nm, 4 nm

Results

| Pk # | Retention Time | Area Percent | Lambda Max |
|------|----------------|--------------|------------|
| 1    | 6.104          | 0.941        | 207        |
| 2    | 8.204          | 99.059       | 199        |

(*S,E*)-di-*tert*-butyl 1-(2-oxo-1-styrylcycloheptyl)hydrazine-1,2-dicarboxylate (**2u**)

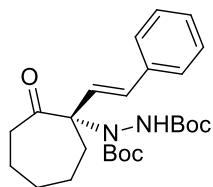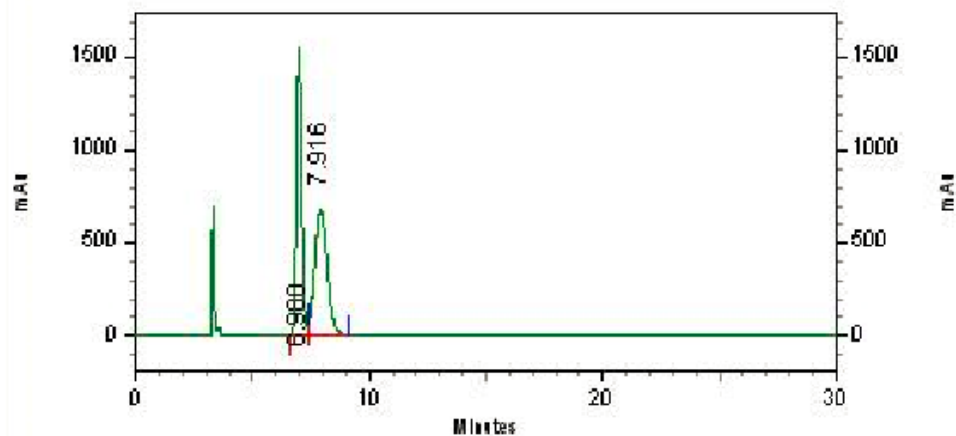

2: 251 nm, 4  
nm Results

| Retention Time | Area     | Area Percent | Lambda Max |
|----------------|----------|--------------|------------|
| 6.980          | 24708884 | 49.414       | 246        |
| 7.916          | 25294847 | 50.586       | 204        |

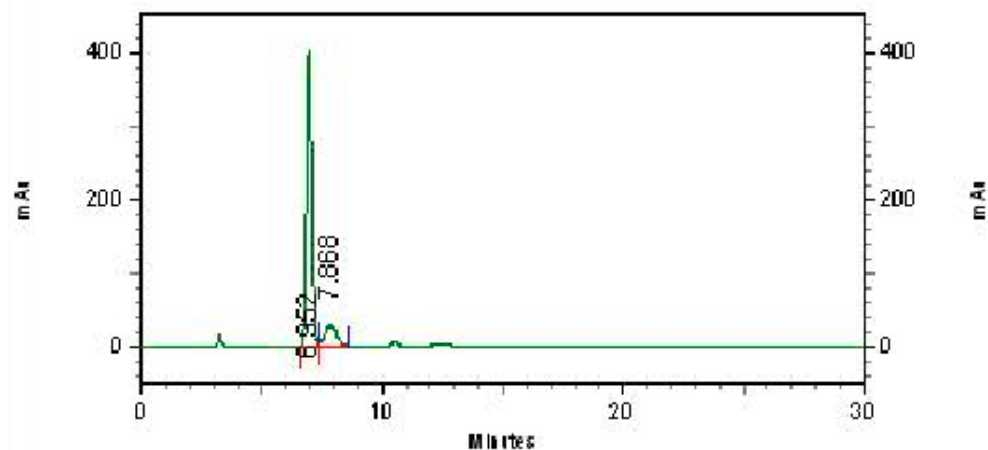

2: 251 nm, 4  
nm Results

| Retention Time | Area    | Area Percent | Lambda Max |
|----------------|---------|--------------|------------|
| 6.952          | 6018615 | 85.829       | 204        |
| 7.868          | 993721  | 14.171       | 203        |

(*S,E*)-di-*tert*-butyl 1-(2-oxo-1-styrylcyclopentyl)hydrazine-1,2-dicarboxylate (**2v**)

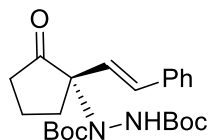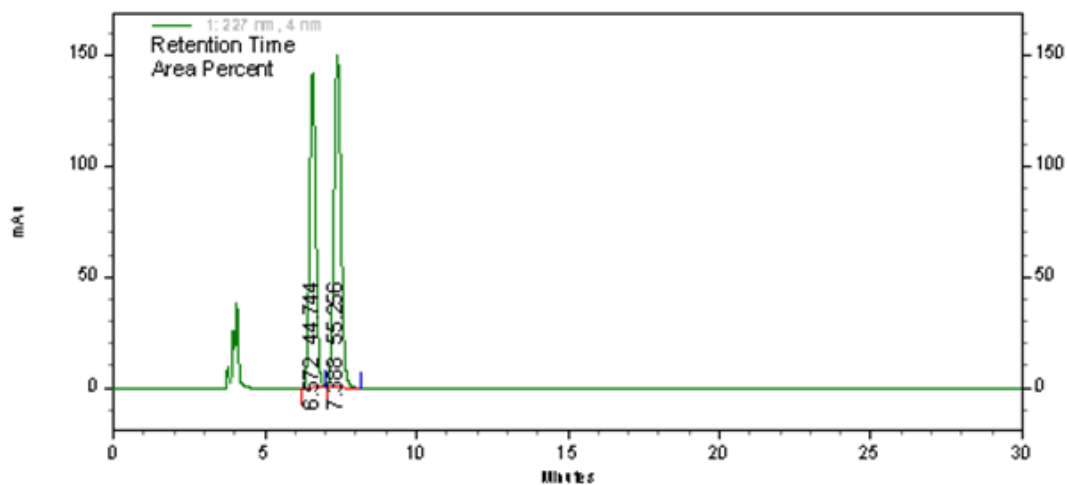

1: 227 nm, 4 nm

Results

| Pk # | Retention Time | Area Percent | Lambda Max |
|------|----------------|--------------|------------|
| 1    | 6.572          | 44.744       | 192        |
| 2    | 7.388          | 55.256       | 192        |

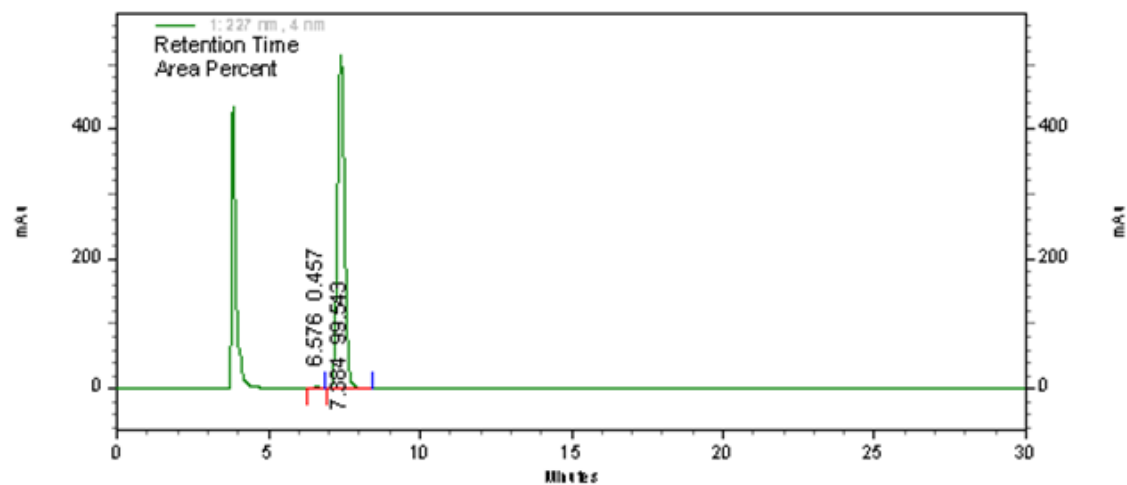

1: 227 nm, 4 nm

Results

| Pk # | Retention Time | Area Percent | Lambda Max |
|------|----------------|--------------|------------|
| 1    | 6.576          | 0.457        | 254        |
| 2    | 7.384          | 99.543       | 203        |



(S)-di-tert-butyl 1-(2-oxo-1-(phenylethynyl)cyclohexyl)hydrazine-1,2-dicarboxylate (**2w**)

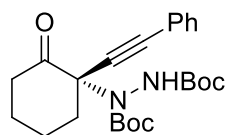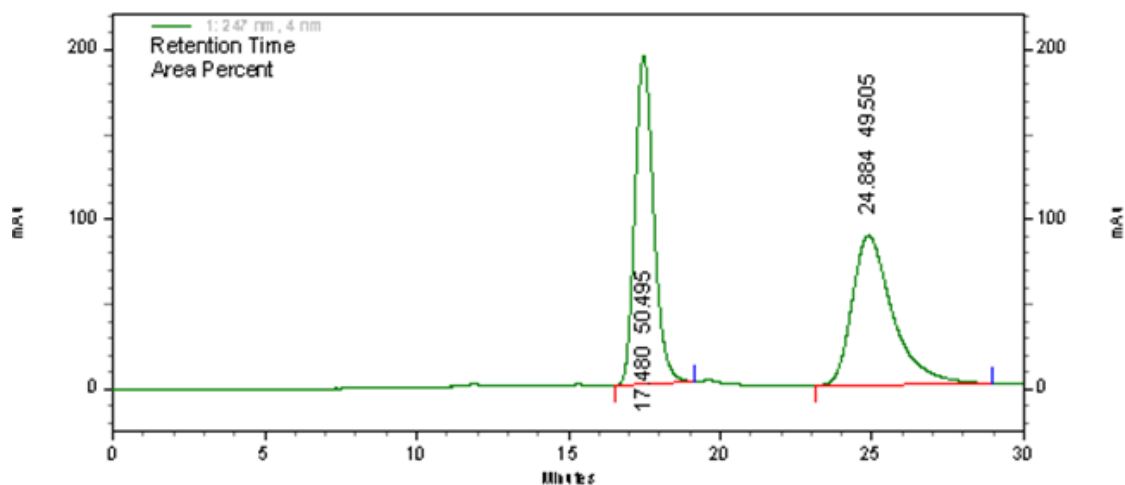

1: 247 nm, 4 nm

Results

| Pk # | Retention Time | Area Percent | Lambda Max |
|------|----------------|--------------|------------|
| 1    | 17.480         | 50.495       | 244        |
| 2    | 24.884         | 49.505       | 245        |

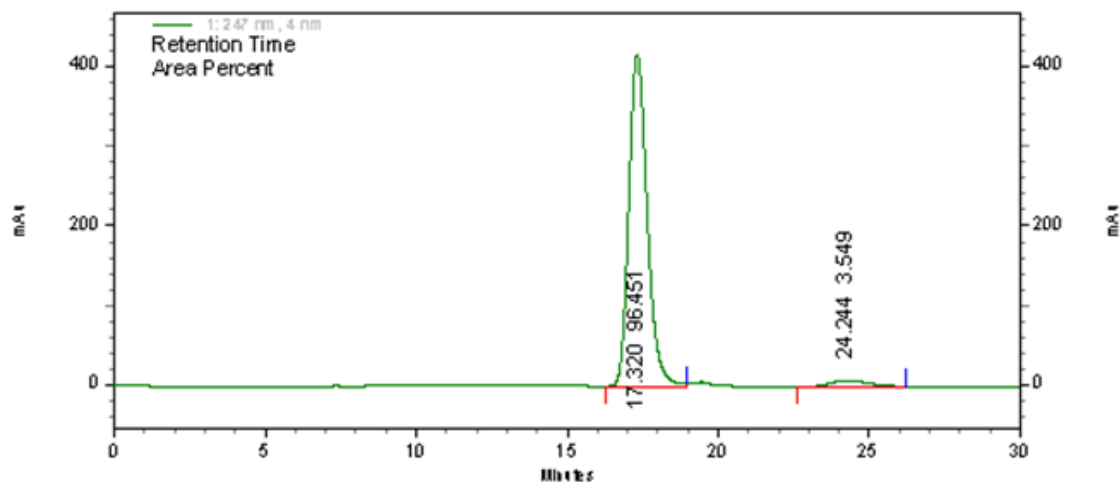

1: 247 nm, 4 nm

Results

| Pk # | Retention Time | Area Percent | Lambda Max |
|------|----------------|--------------|------------|
| 1    | 17.320         | 96.451       | 206        |
| 2    | 24.244         | 3.549        | 233        |

(R)-N-(1-methyl-2-oxocyclohexyl)benzamide (S4)

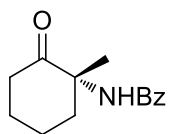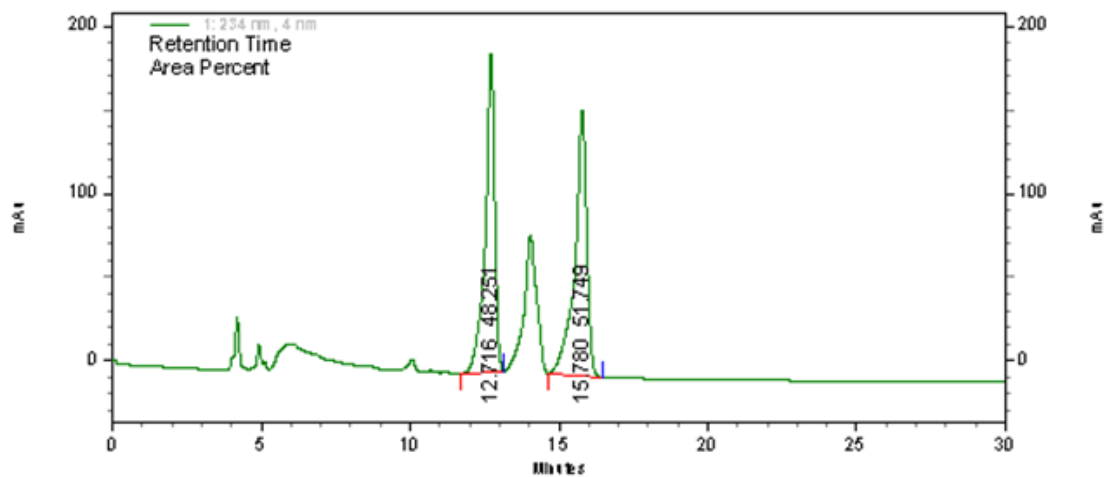

1: 234 nm, 4 nm

Results

| Pk # | Retention Time | Area Percent | Lambda Max |
|------|----------------|--------------|------------|
| 1    | 12.716         | 48.251       | 202        |
| 2    | 15.780         | 51.749       | 202        |

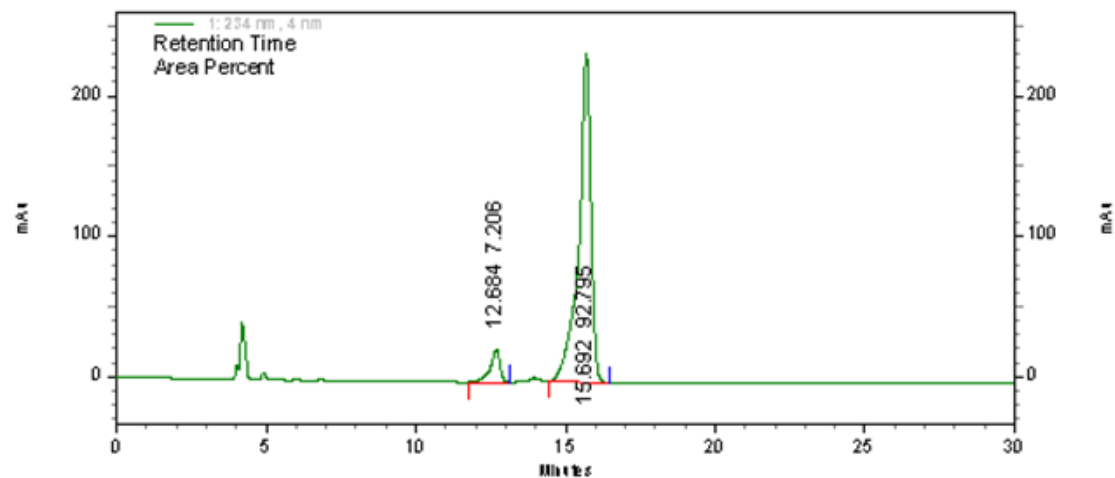

1: 234 nm, 4 nm

Results

| Pk # | Retention Time | Area Percent | Lambda Max |
|------|----------------|--------------|------------|
| 1    | 12.684         | 7.206        | 203        |
| 2    | 15.692         | 92.795       | 202        |

(S)-di-tert-butyl 1-(1-benzyl-2-oxocyclohexyl)hydrazine-1,2-dicarboxylate (**2y**)

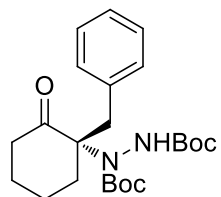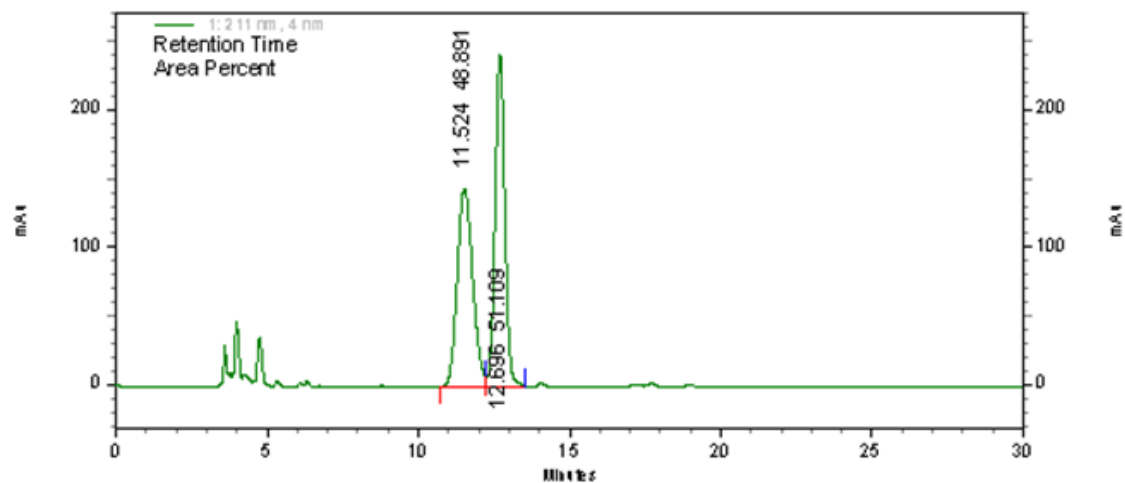

1: 211 nm, 4 nm

Results

| Pk # | Retention Time | Area Percent | Lambda Max |
|------|----------------|--------------|------------|
| 1    | 11.524         | 48.891       | 203        |
| 2    | 12.696         | 51.109       | 203        |

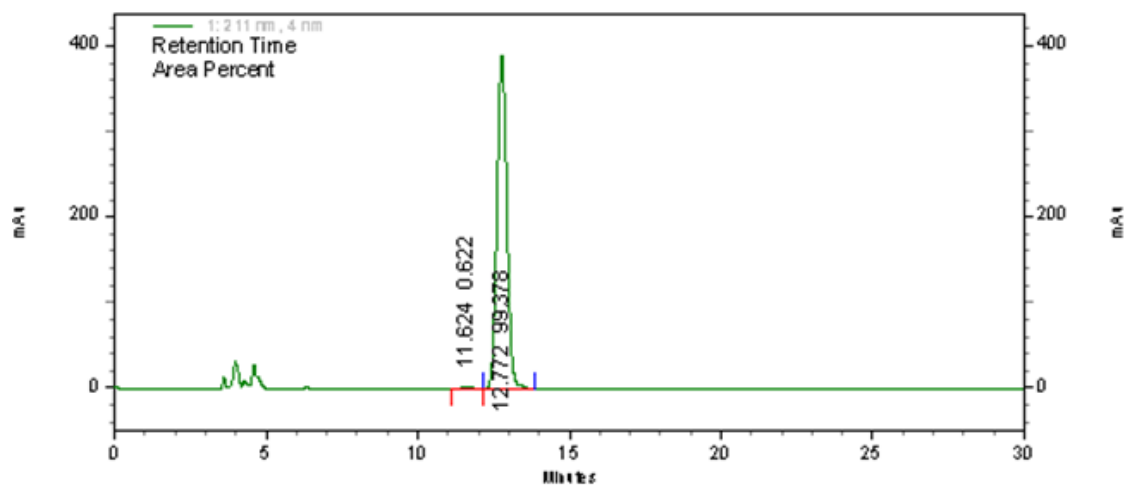

1: 211 nm, 4 nm

Results

| Pk # | Retention Time | Area Percent | Lambda Max |
|------|----------------|--------------|------------|
| 1    | 11.624         | 0.622        | 681        |
| 2    | 12.772         | 99.378       | 681        |

(*R*)-di-*tert*-butyl 1-(2-oxo-1-(thiophen-2-yl)cyclohexyl)hydrazine-1,2-dicarboxylate (**2z**)

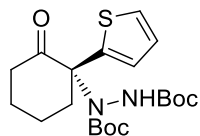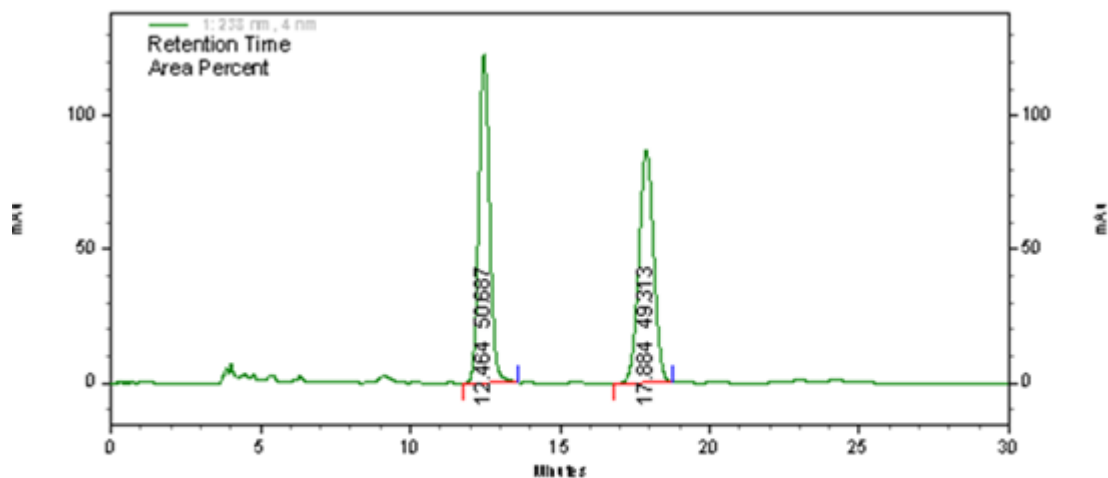

1: 238 nm, 4 nm

Results

| Pk # | Retention Time | Area Percent | Lambda Max |
|------|----------------|--------------|------------|
| 1    | 12.464         | 50.687       | 237        |
| 2    | 17.884         | 49.313       | 237        |

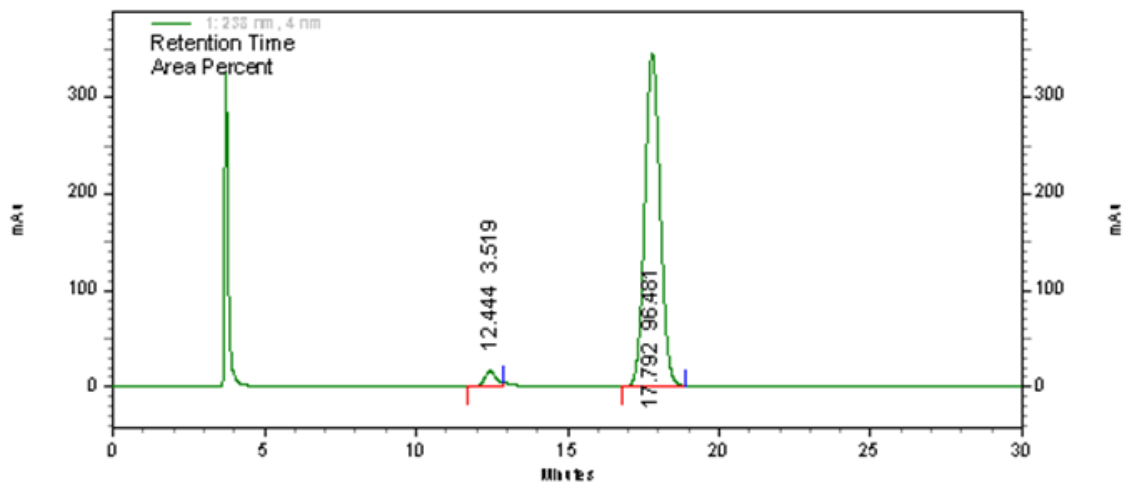

1: 238 nm, 4 nm

Results

| Pk # | Retention Time | Area Percent | Lambda Max |
|------|----------------|--------------|------------|
| 1    | 12.444         | 3.519        | 237        |
| 2    | 17.792         | 96.481       | 237        |

(R)-2-(thiophen-2-yl)cyclohexanone (**1z**)

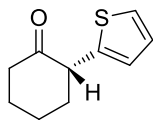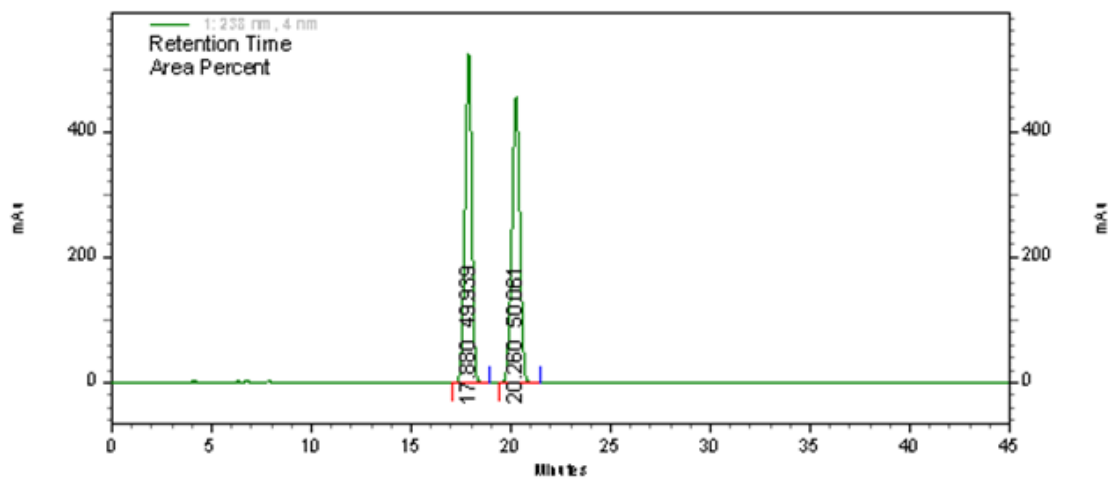

1: 238 nm, 4 nm

Results

| Pk # | Retention Time | Area Percent | Lambda Max |
|------|----------------|--------------|------------|
| 1    | 17.880         | 49.939       | 231        |
| 2    | 20.260         | 50.061       | 232        |

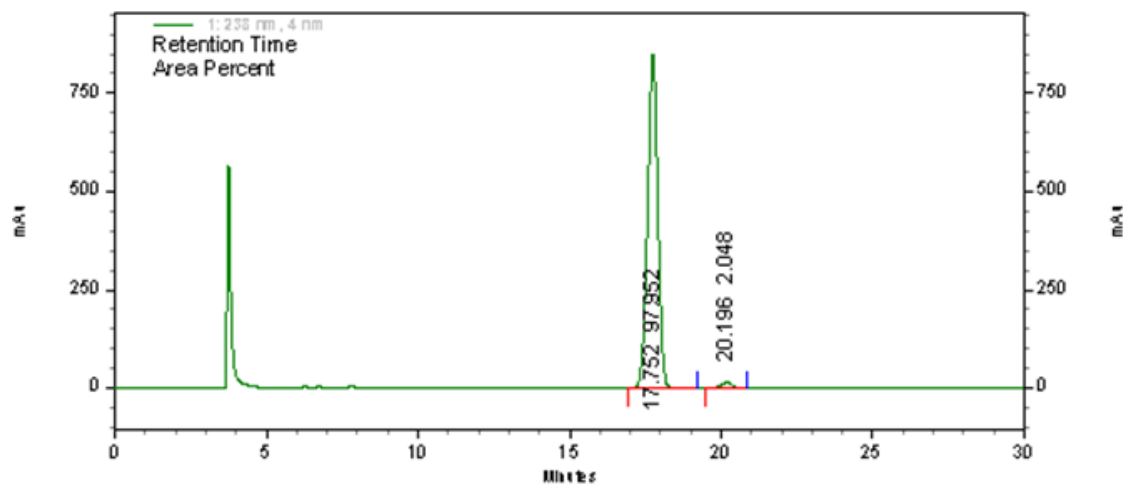

1: 238 nm, 4 nm

Results

| Pk # | Retention Time | Area Percent | Lambda Max |
|------|----------------|--------------|------------|
| 1    | 17.752         | 97.952       | 190        |
| 2    | 20.196         | 2.048        | 669        |

(*S,E*)-2-styrylcyclohexanone (**1n**)

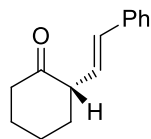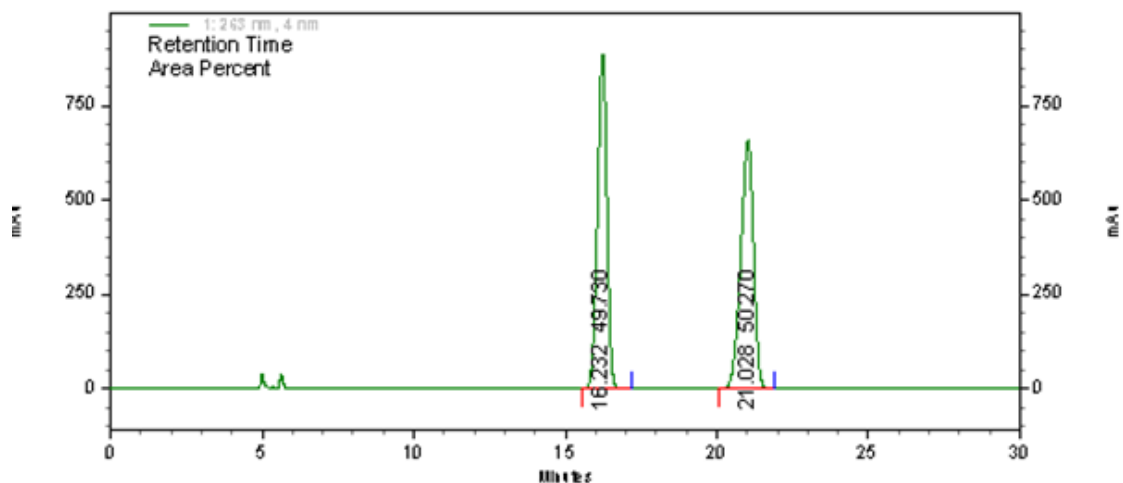

1: 263 nm, 4 nm

Results

| Pk # | Retention Time | Area Percent | Lambda Max |
|------|----------------|--------------|------------|
| 1    | 16.232         | 49.730       | 201        |
| 2    | 21.028         | 50.270       | 198        |

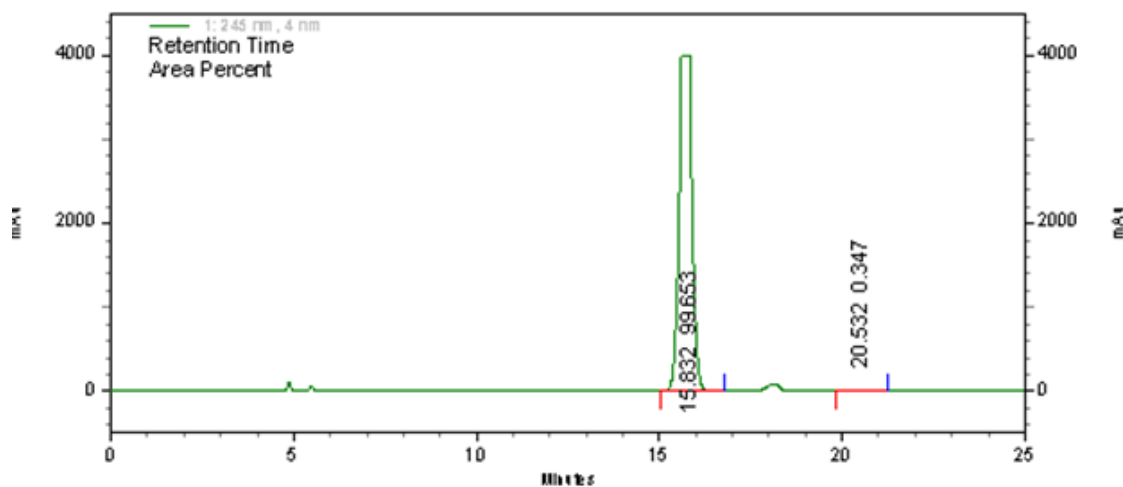

1: 245 nm, 4 nm

Results

| Pk # | Retention Time | Area Percent | Lambda Max |
|------|----------------|--------------|------------|
| 1    | 15.832         | 99.653       | 246        |
| 2    | 20.532         | 0.347        | 664        |

(*S,E*)-4,4-dimethyl-2-styrylcyclohexanone (**1t**)

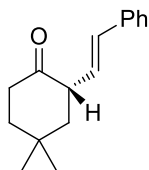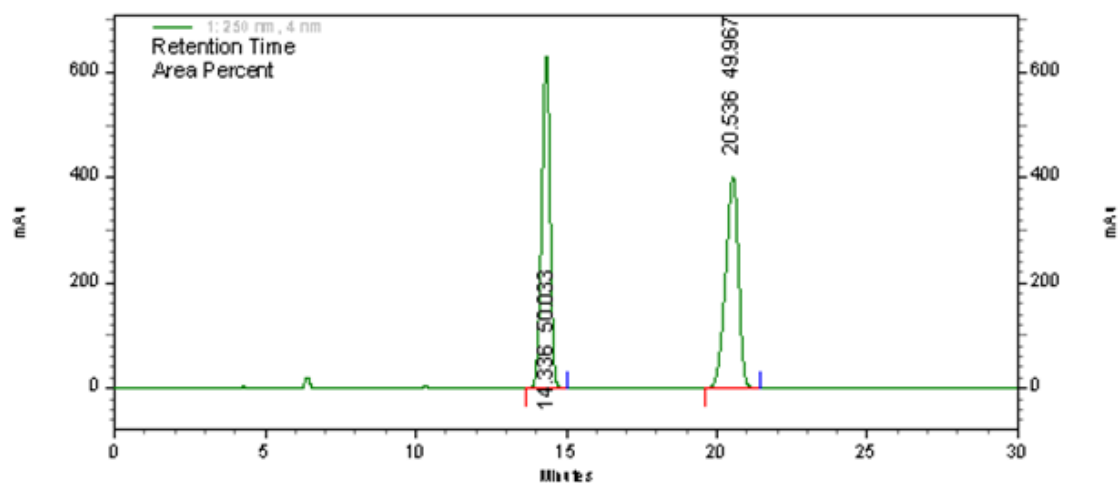

1: 250 nm, 4 nm

Results

| Pk # | Retention Time | Area Percent | Lambda Max |
|------|----------------|--------------|------------|
| 1    | 14.336         | 50.033       | 193        |
| 2    | 20.536         | 49.967       | 190        |

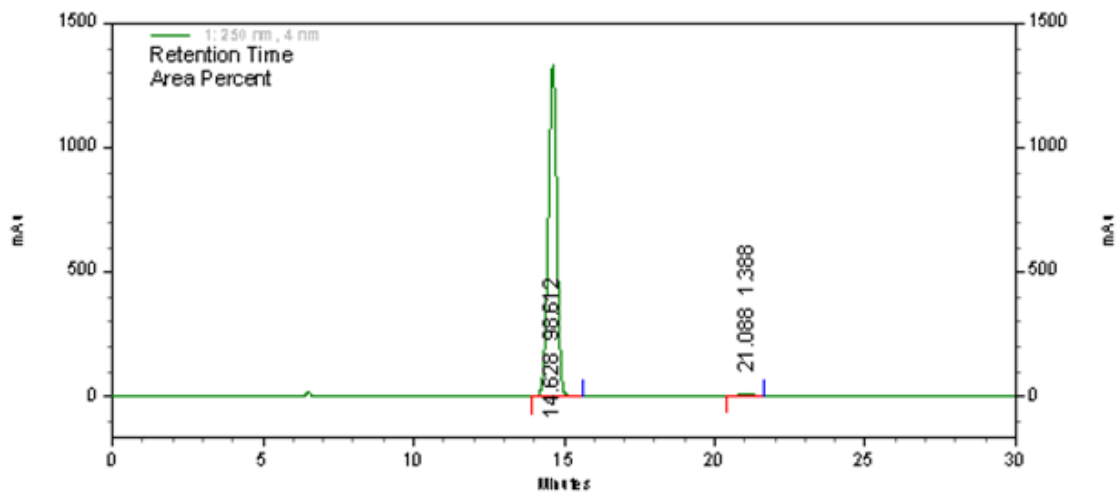

1: 250 nm, 4 nm

Results

| Pk # | Retention Time | Area Percent | Lambda Max |
|------|----------------|--------------|------------|
| 1    | 14.628         | 98.612       | 199        |
| 2    | 21.088         | 1.388        | 665        |

*N*-((1*S*,2*R*)-2-hydroxy-1-phenylcyclohexyl)benzamide (**3a**)

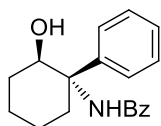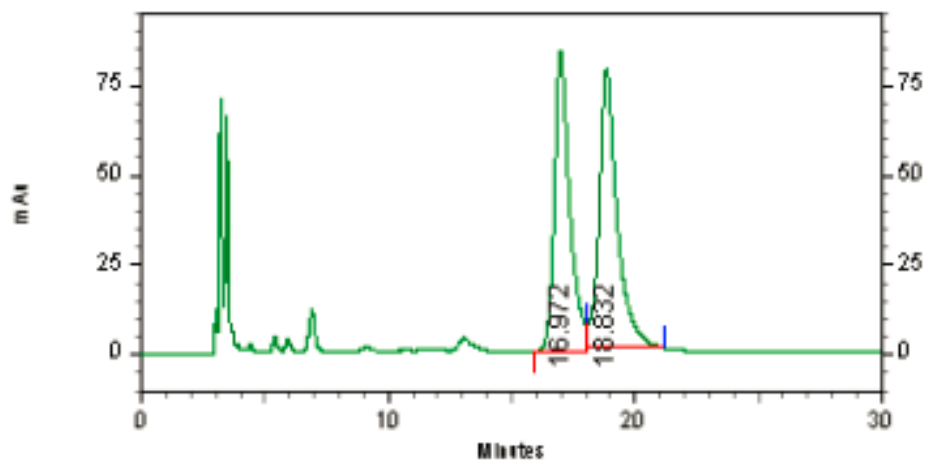

1: 220 nm, 4  
nm Results

| Retention Time | Area    | Area Percent | Lambda Max |
|----------------|---------|--------------|------------|
| 16.972         | 3648823 | 48.166       | 202        |
| 18.832         | 3926701 | 51.834       | 202        |

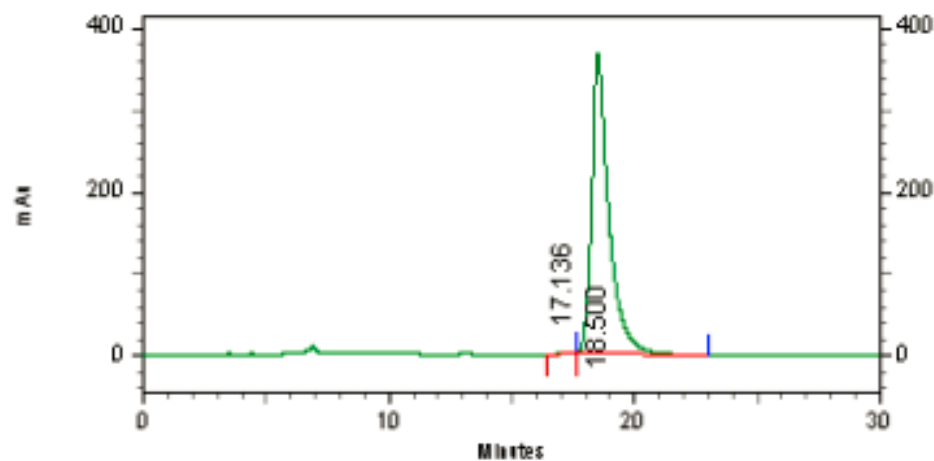

1: 239 nm, 4  
nm Results

| Retention Time | Area     | Area Percent | Lambda Max |
|----------------|----------|--------------|------------|
| 17.136         | 100177   | 0.564        | 201        |
| 18.500         | 17662885 | 99.436       | 202        |



(S)-Ketamine:

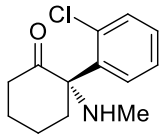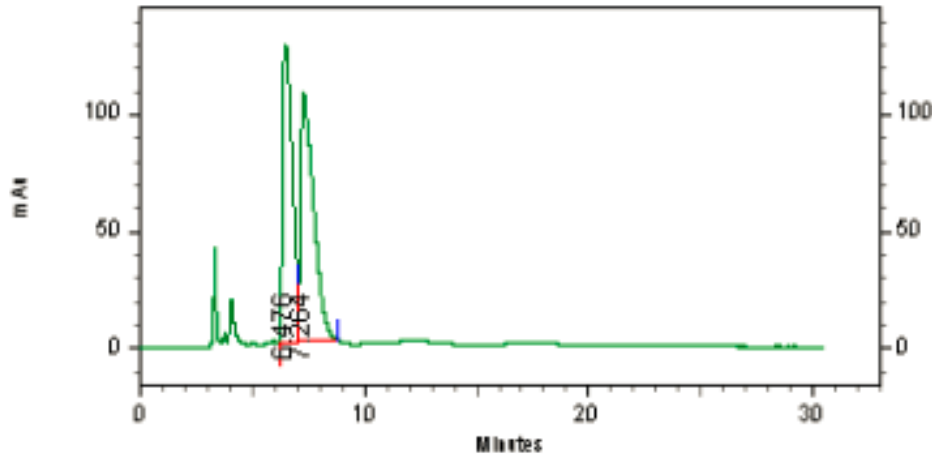

1: 220 nm, 4  
nm Results

| Retention Time | Area    | Area Percent | Lambda Max |
|----------------|---------|--------------|------------|
| 6.476          | 3938863 | 48.210       | 202        |
| 7.264          | 4231347 | 51.790       | 202        |

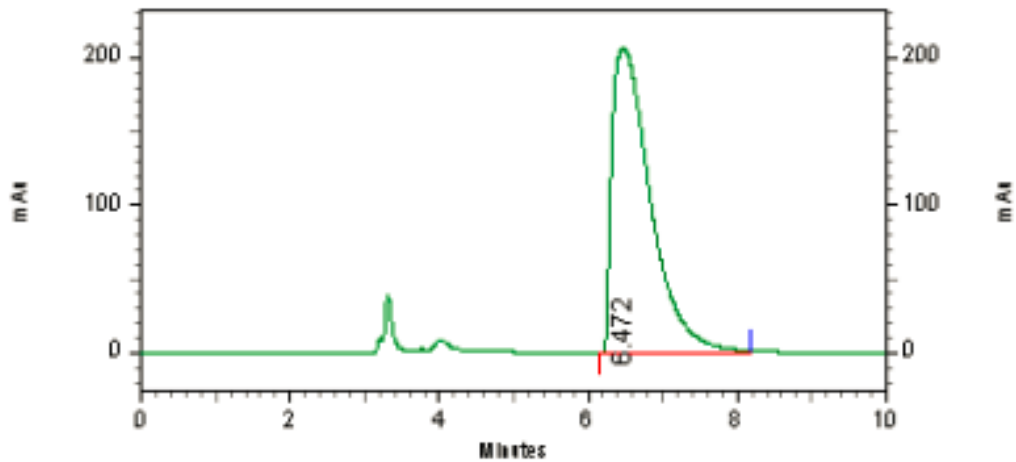

1: 220 nm, 4  
nm Results

| Retention Time | Area    | Area Percent | Lambda Max |
|----------------|---------|--------------|------------|
| 6.472          | 7474102 | 100.000      | 202        |

(*E*)-tert-butyl ((2-oxo-1-styrylcyclohexyl)(phenyl)methyl)carbamate (**5n**)

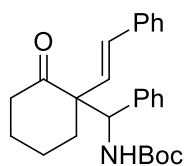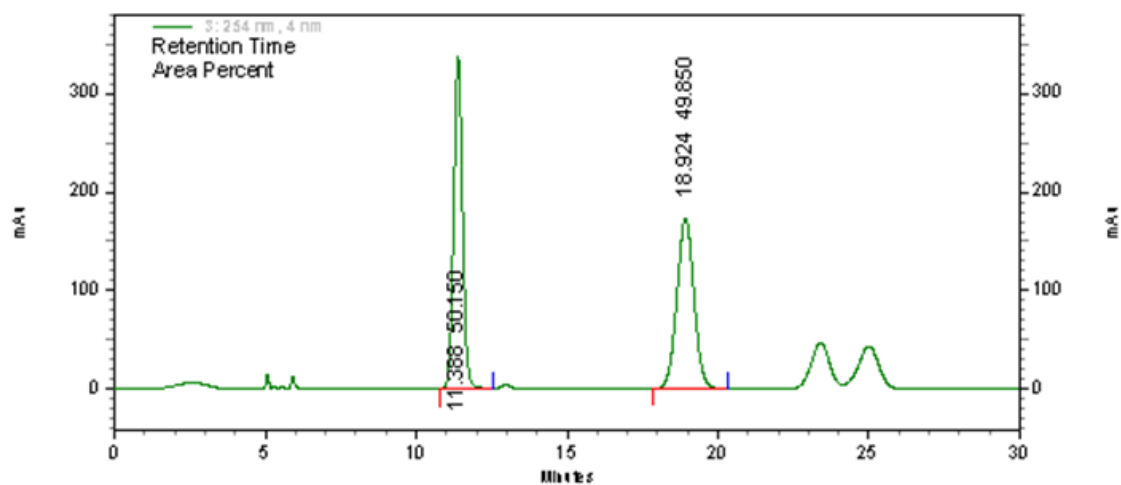

3: 254 nm, 4 nm

Results

| Pk # | Retention Time | Area Percent | Lambda Max |
|------|----------------|--------------|------------|
| 1    | 11.388         | 50.150       | 191        |
| 2    | 18.924         | 49.850       | 205        |

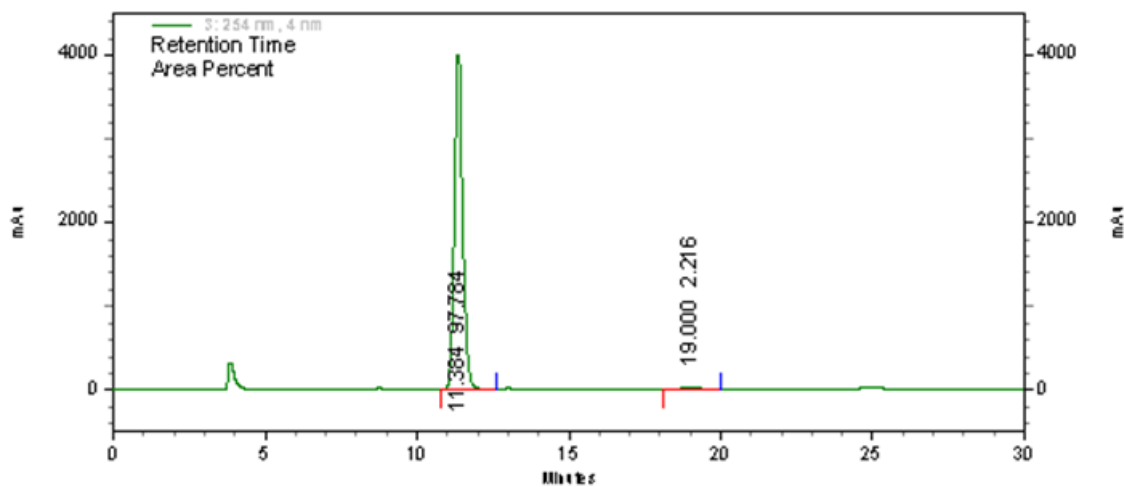

3: 254 nm, 4 nm

Results

| Pk # | Retention Time | Area Percent | Lambda Max |
|------|----------------|--------------|------------|
| 1    | 11.384         | 97.784       | 252        |
| 2    | 19.000         | 2.216        | 676        |

(*R*)-6,6'-dioctyl-3,3'-bis(2,4,6-tricyclohexylphenyl)-[1,1'-binaphthalene]-2,2'-diol (**S2**)

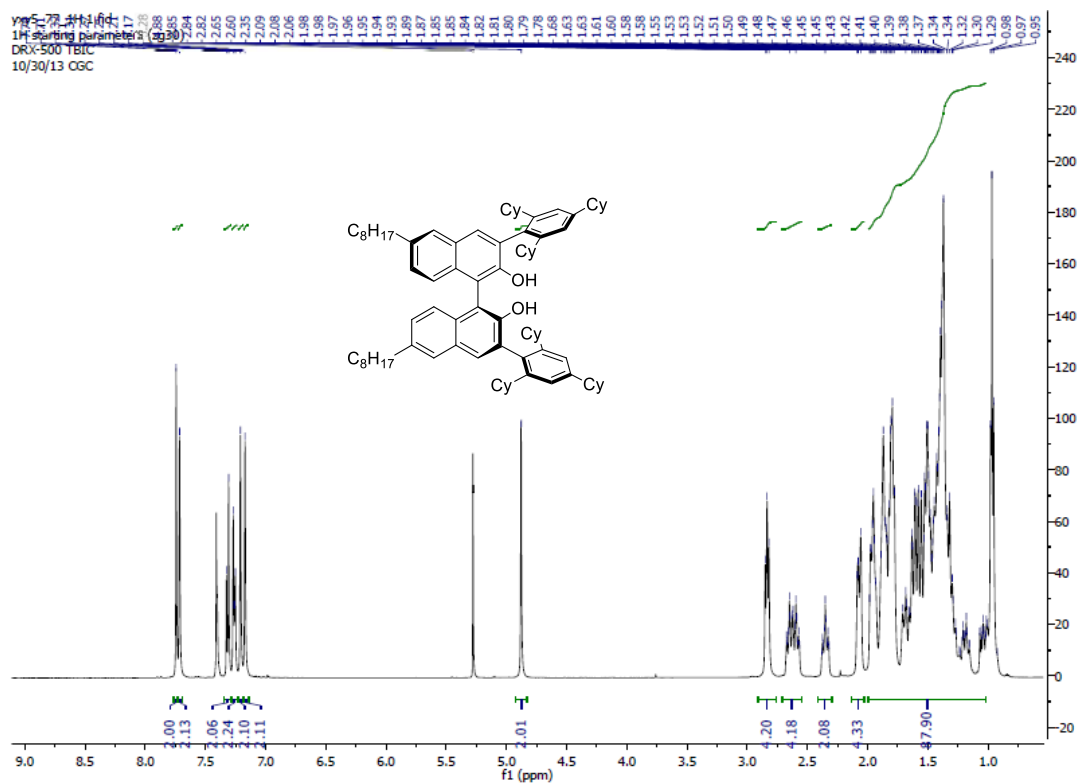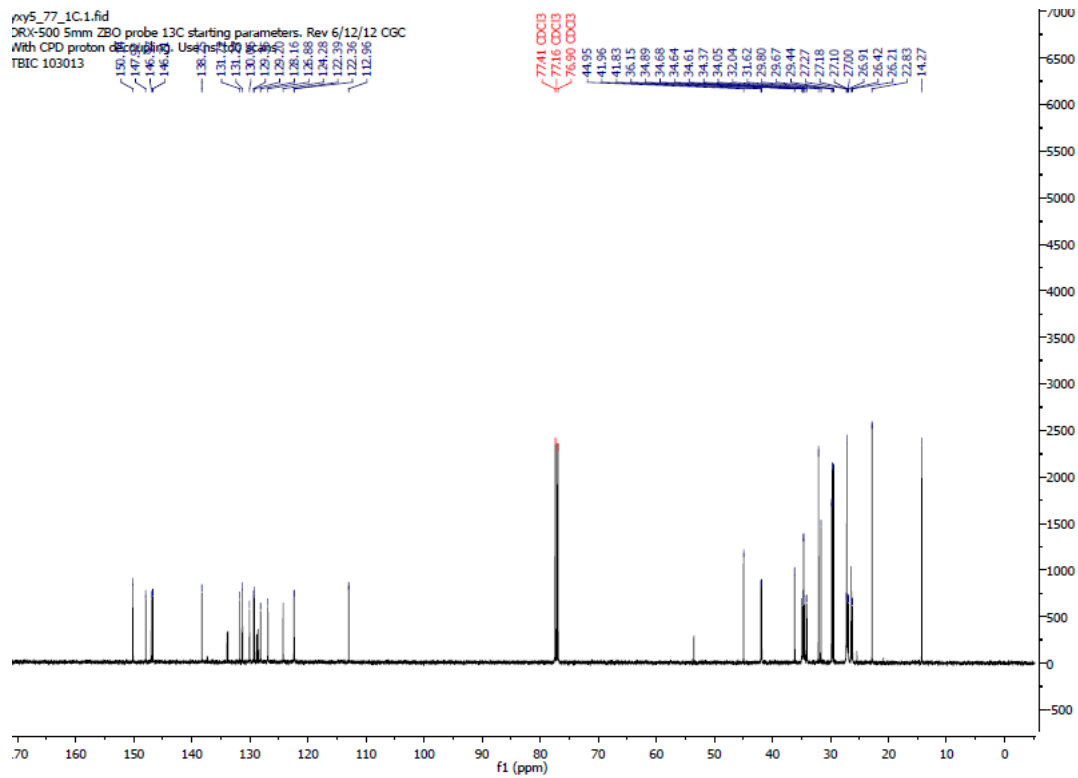

# (R)-C<sub>8</sub>\_TCYP

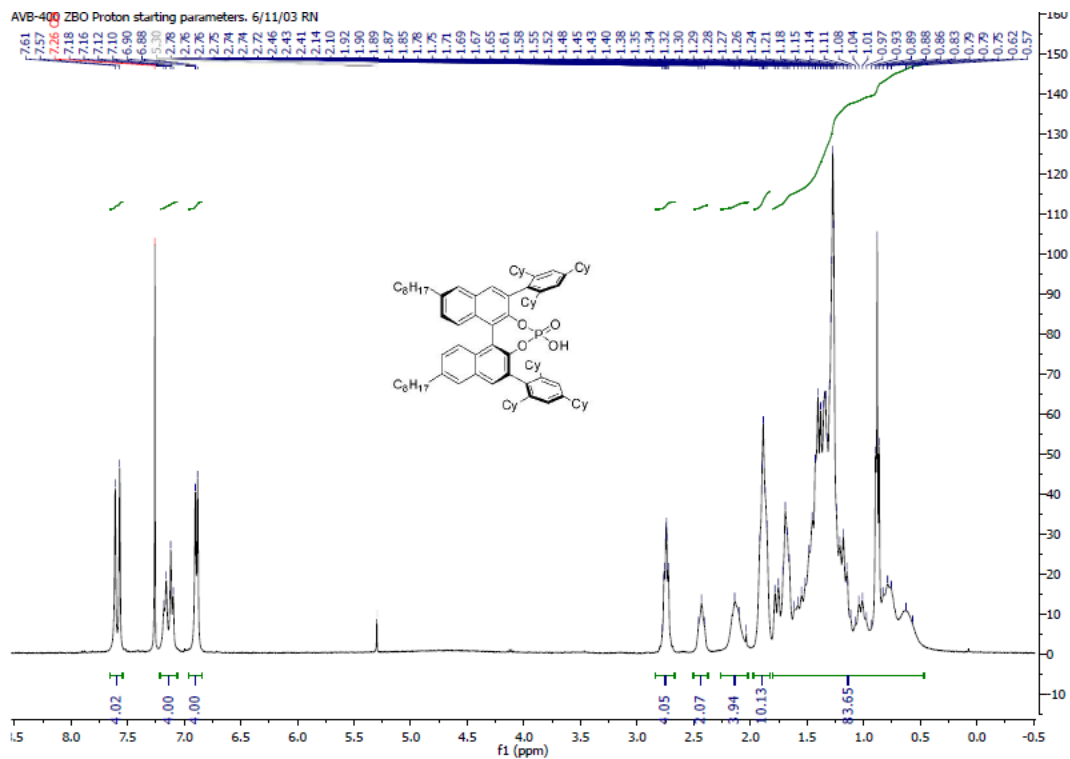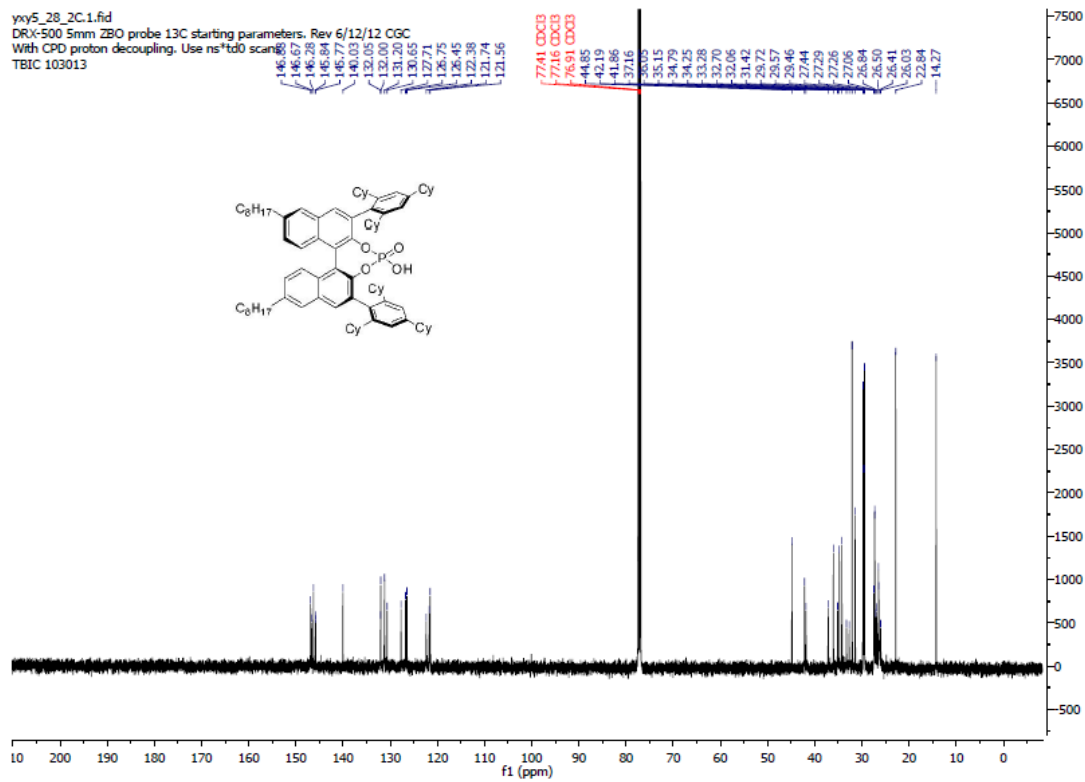

xyys\_z8\_zh1.hd  
 AVQ-400 QNP 31P Starting parameters. Trimethyl phosphate=3.0 ppm, 7/16/03 Rev 7/22/03 RN

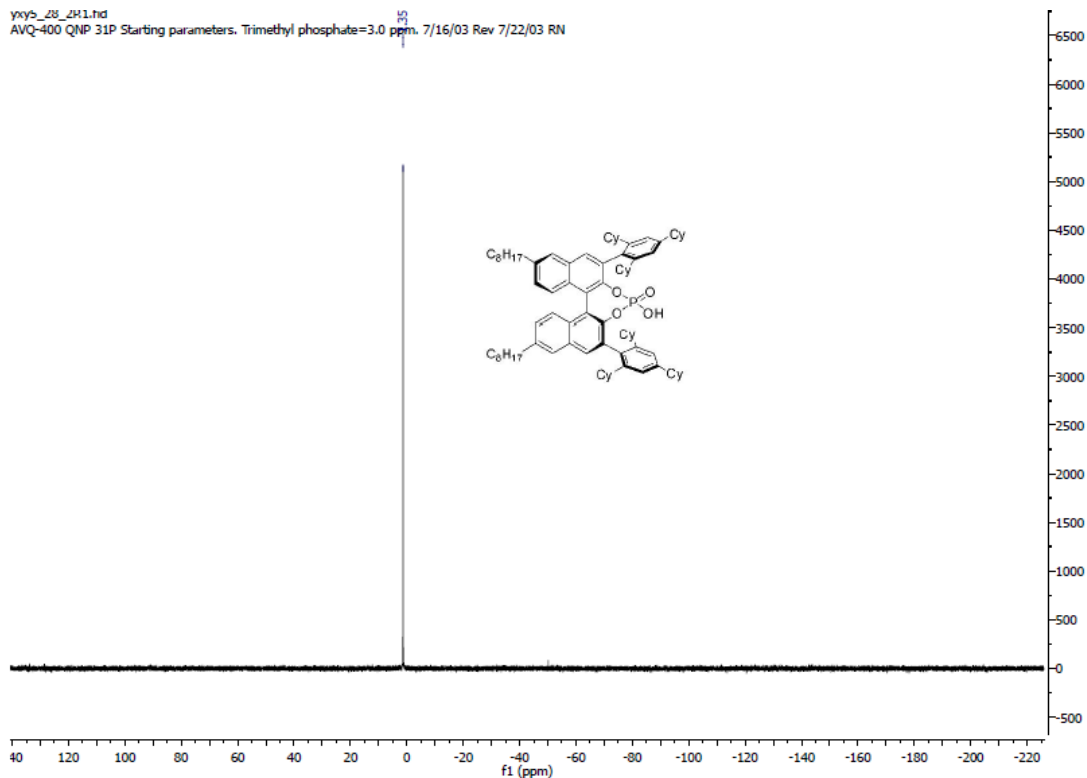

(R)-H<sub>8</sub>\_TCYP

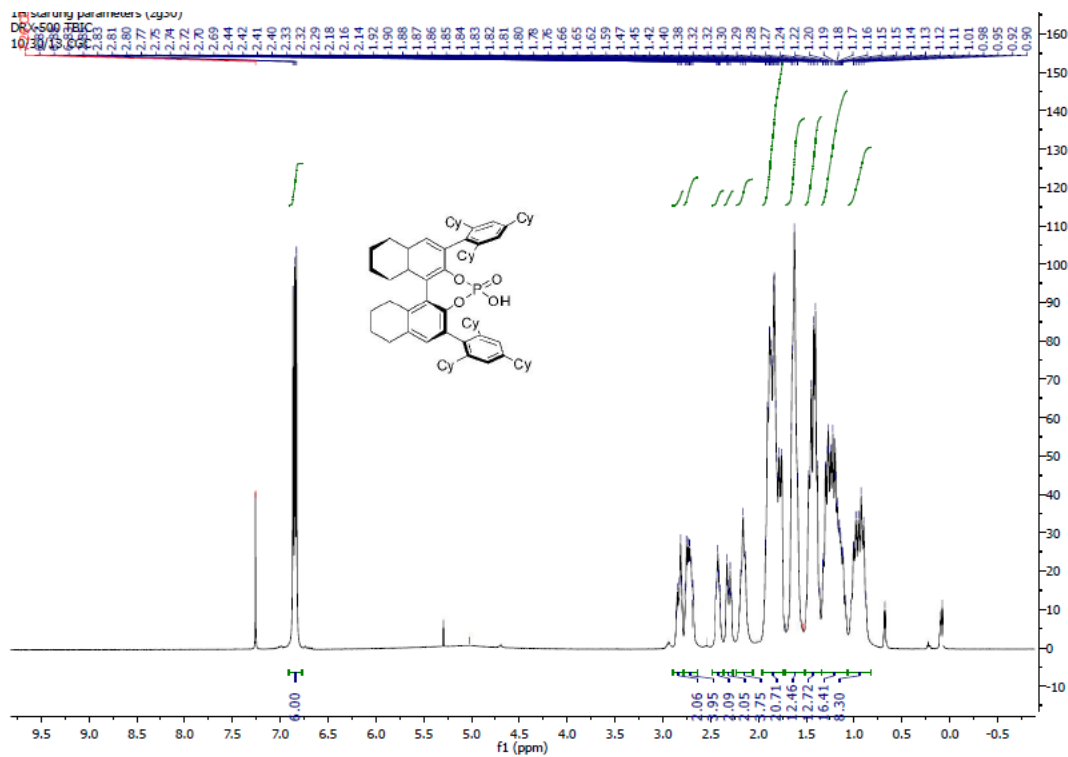

H8TCYP-C.1.fid  
 DRX-500 5mm ZBO probe 13C starting parameters. Rev 6/12/12 CGC  
 With CPD pulse decoupling. Use 4500 scans  
 TBIC 103012

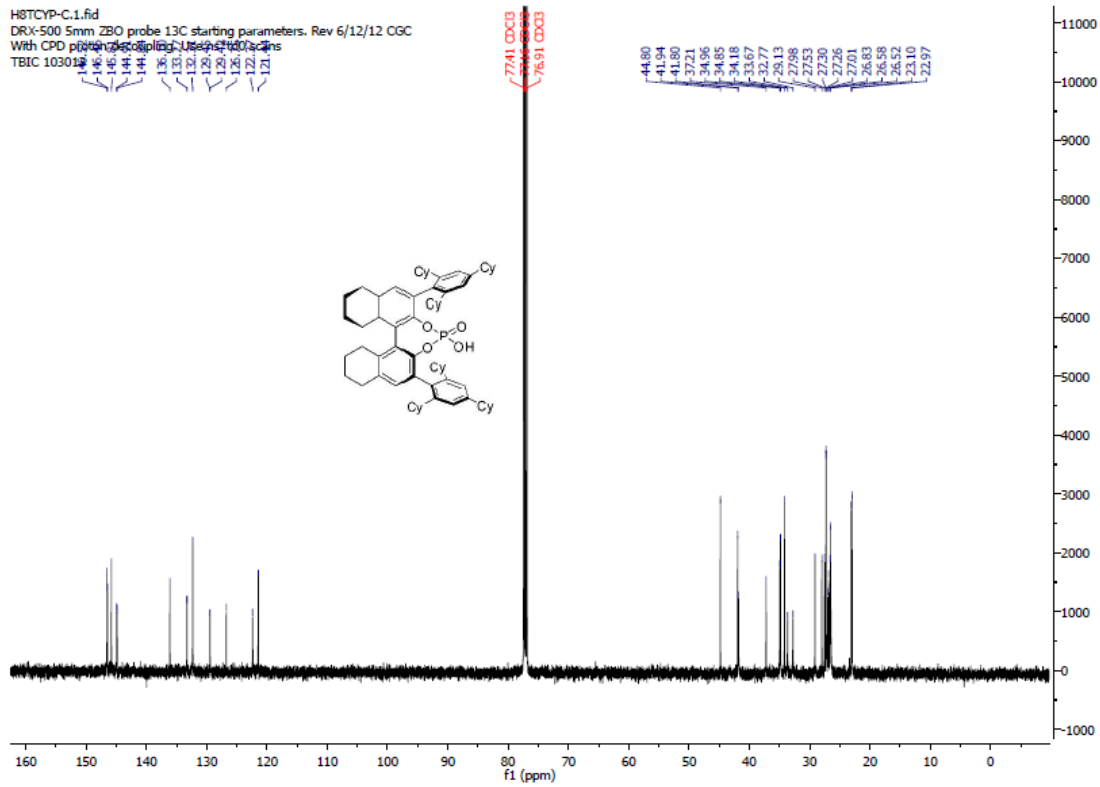

H8\_TCYP-R1.fid  
 AVQ-400 QNP 31P Starting parameters. Trimethyl phosphate=3.0 ppm. 7/16/03 Rev 7/22/03 RN

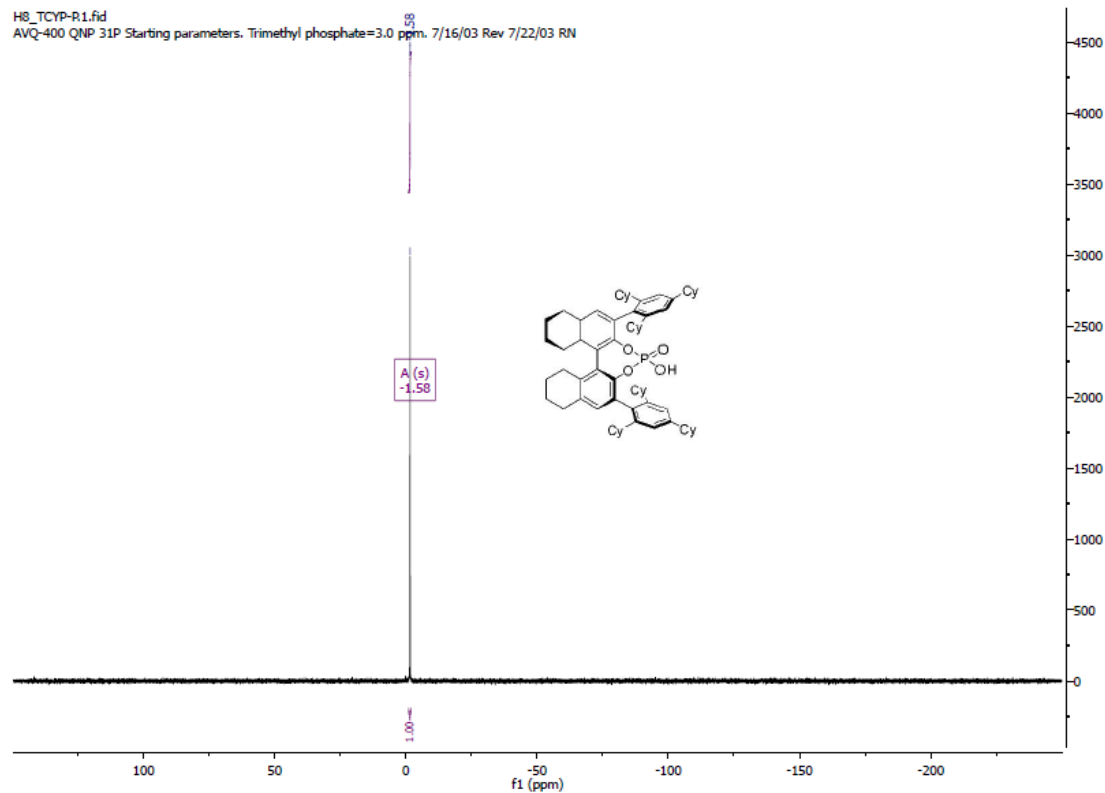

*tert*-butyl 4-(2-oxocyclohexyl)benzoate (**1h**)

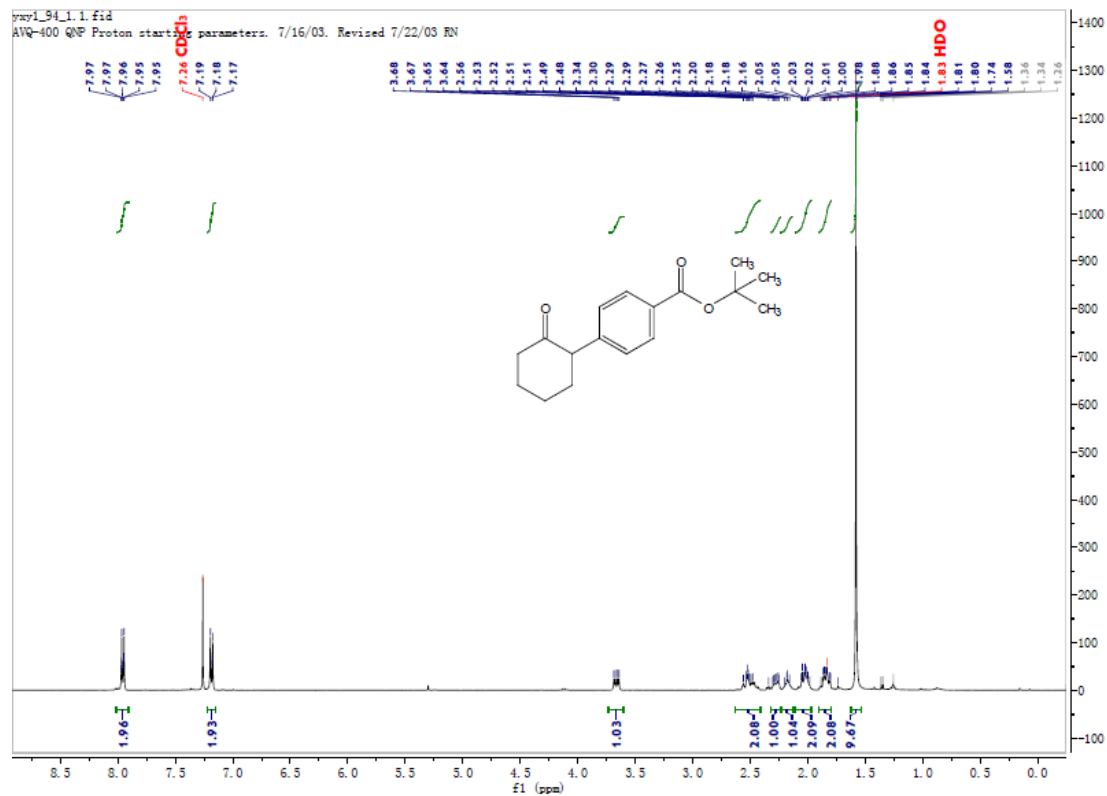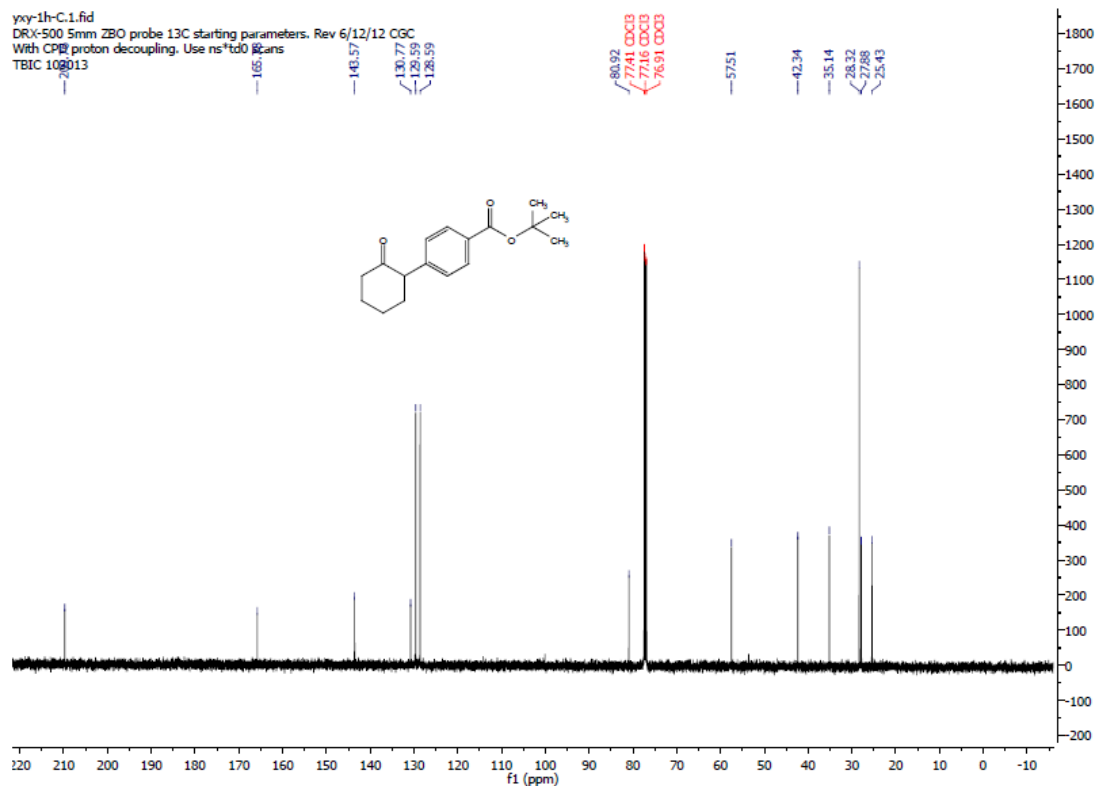

(Z)-2-styrylcyclohexanone (**1q**)

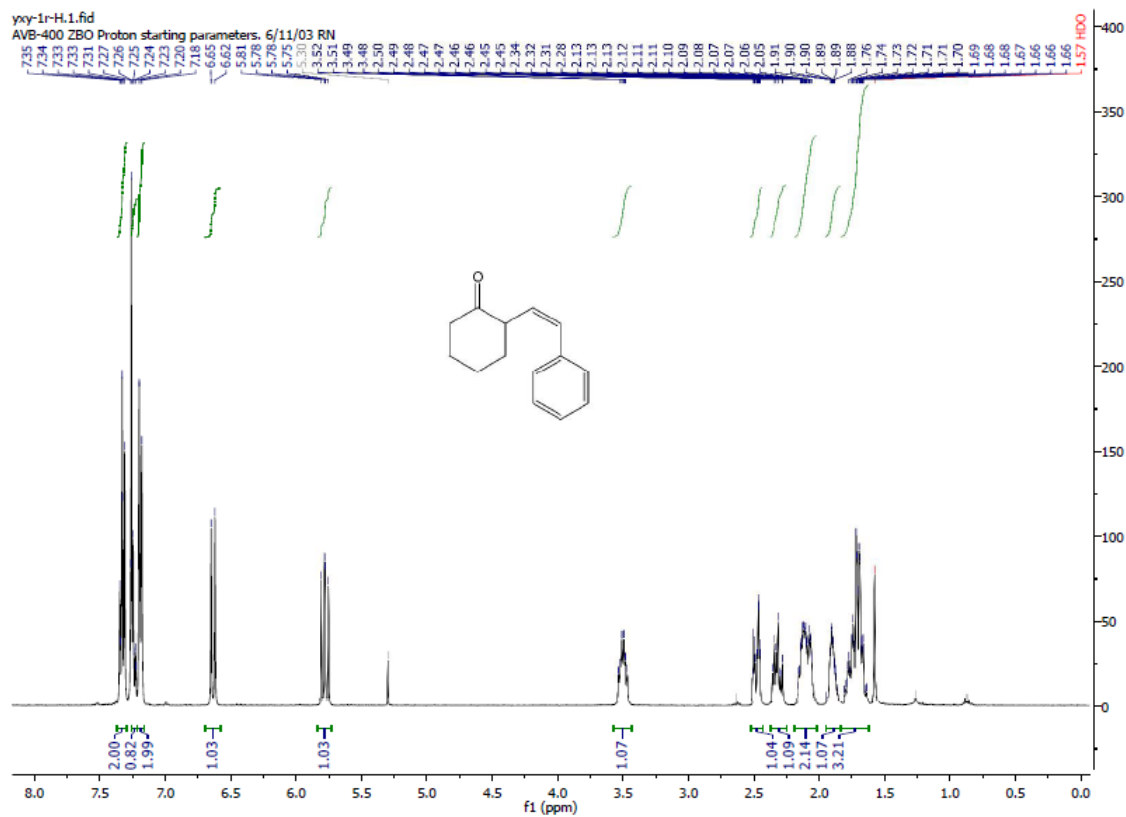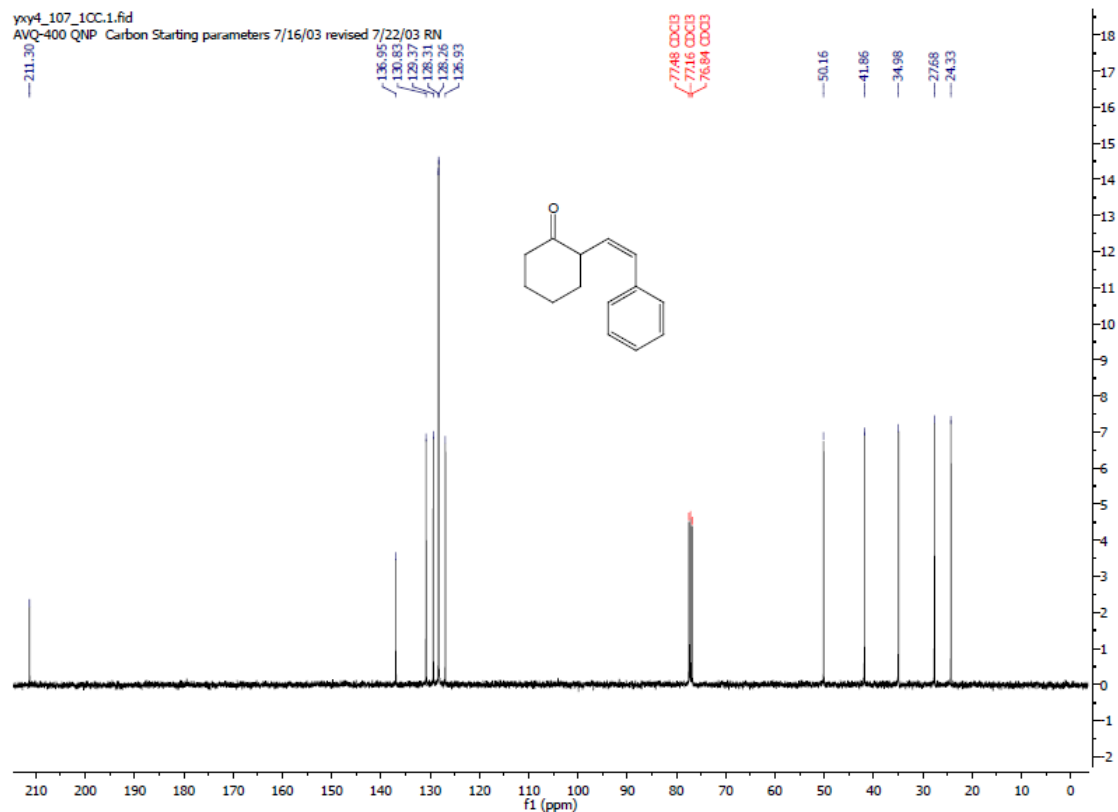





(E)-4,4-dimethyl-2-styrylcyclohexanone (**1u**)

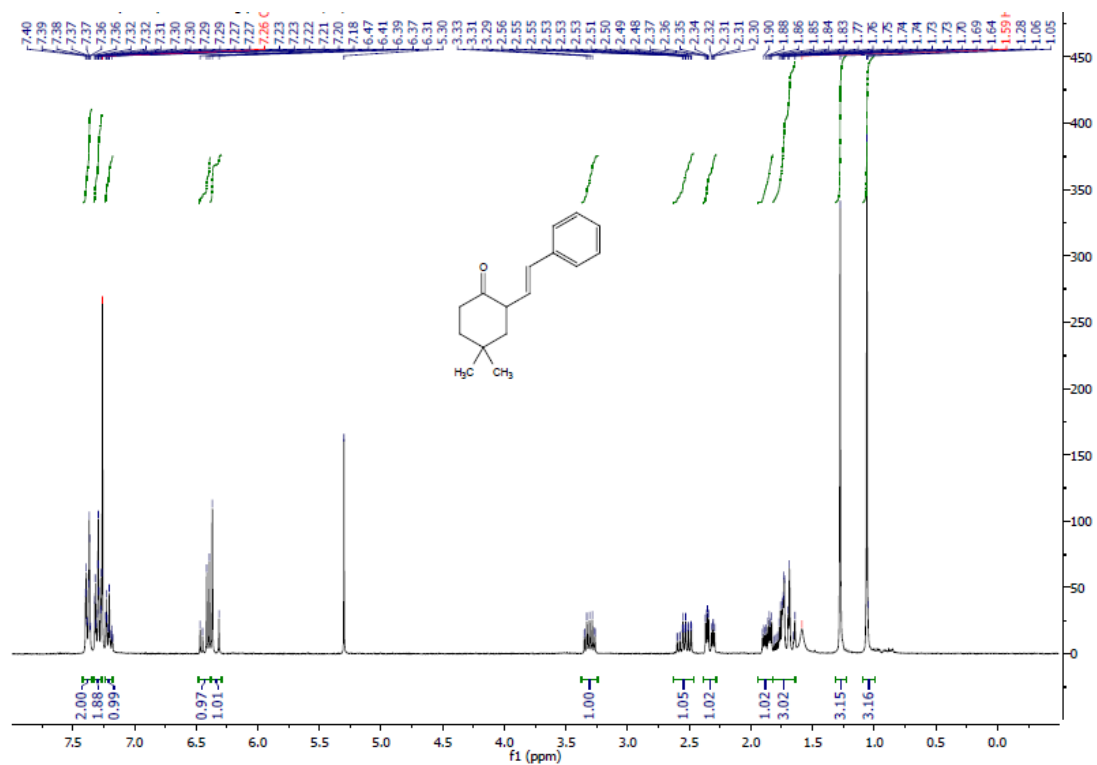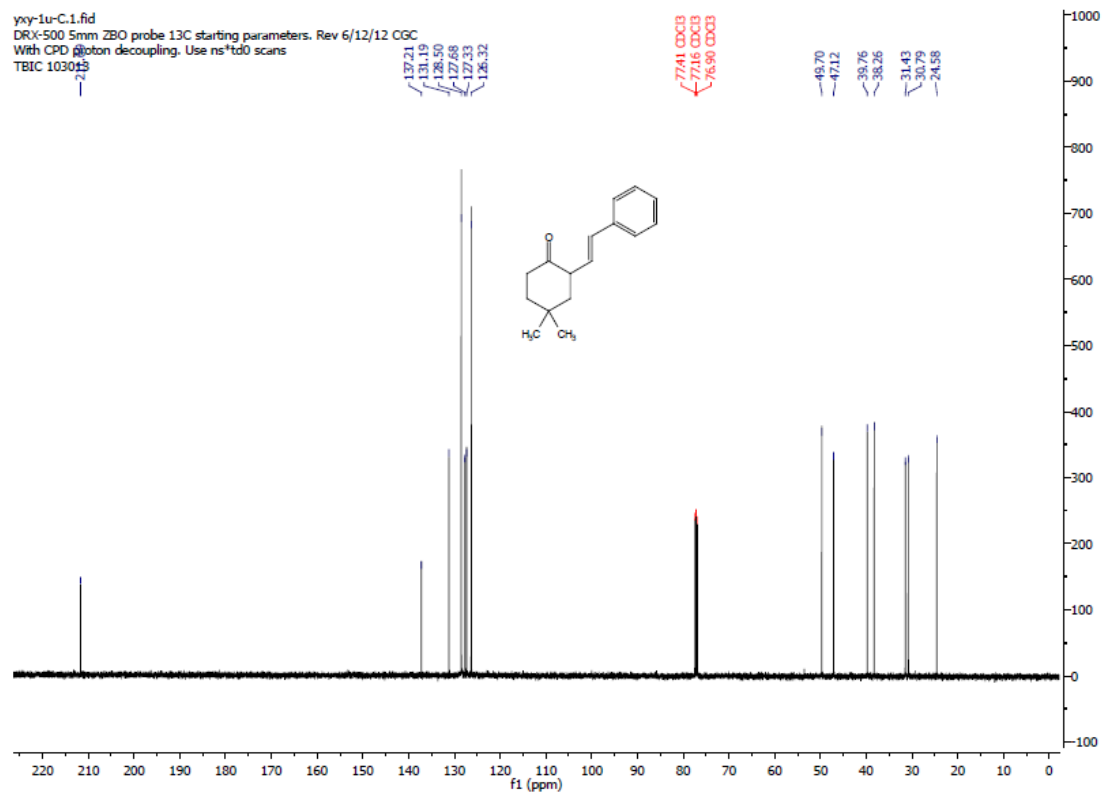

(S)-di-tert-butyl 1-(2-oxo-1-phenylcyclohexyl)hydrazine-1,2-dicarboxylate (**2a**)

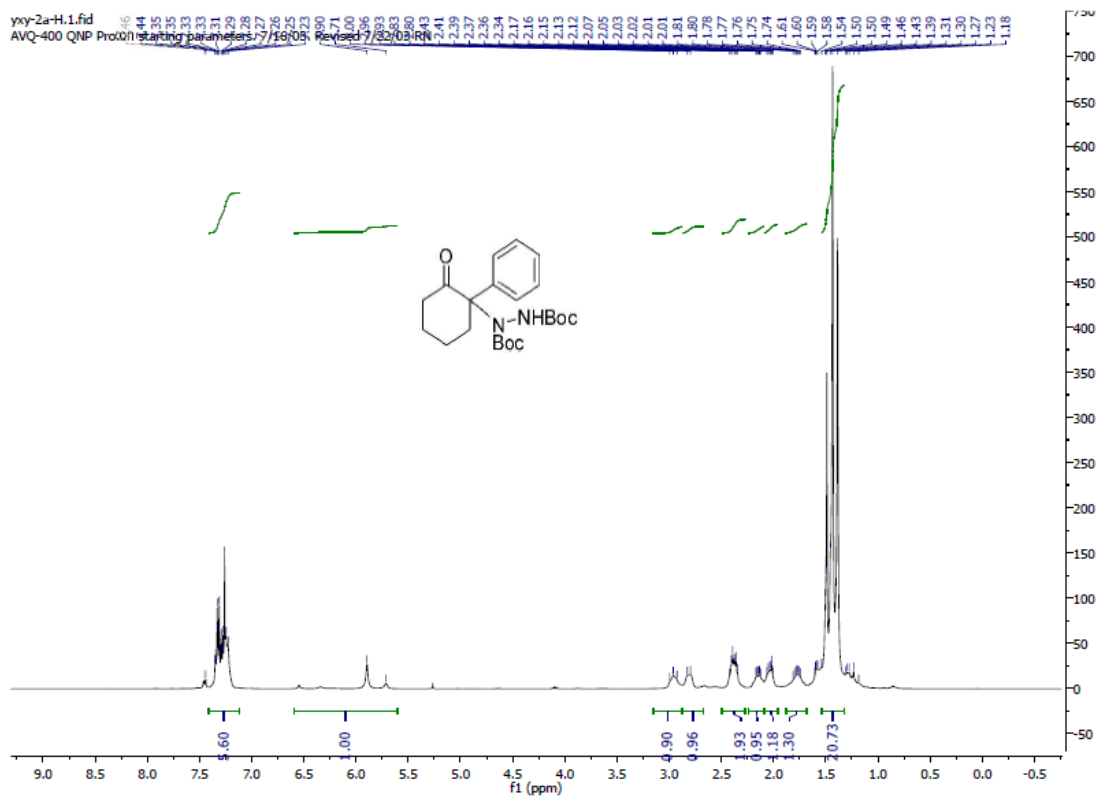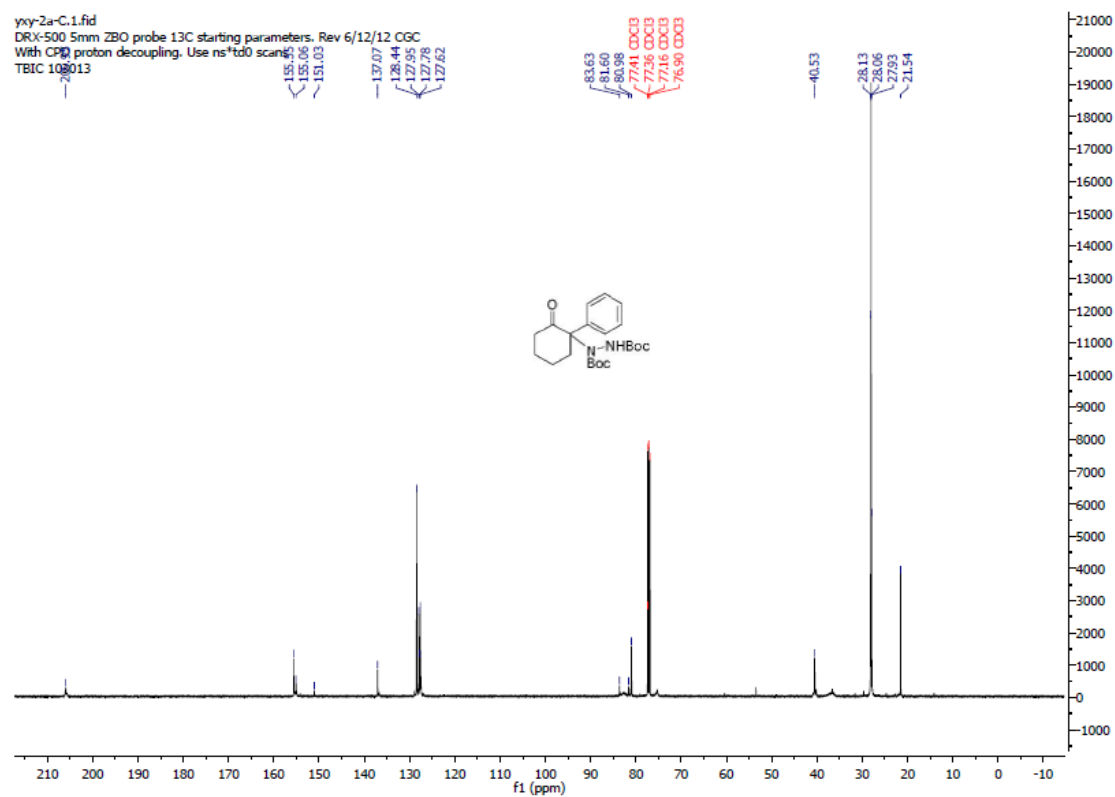

(S)-di-tert-butyl 1-(2-oxo-1-(p-tolyl)cyclohexyl)hydrazine-1,2-dicarboxylate (**2b**)

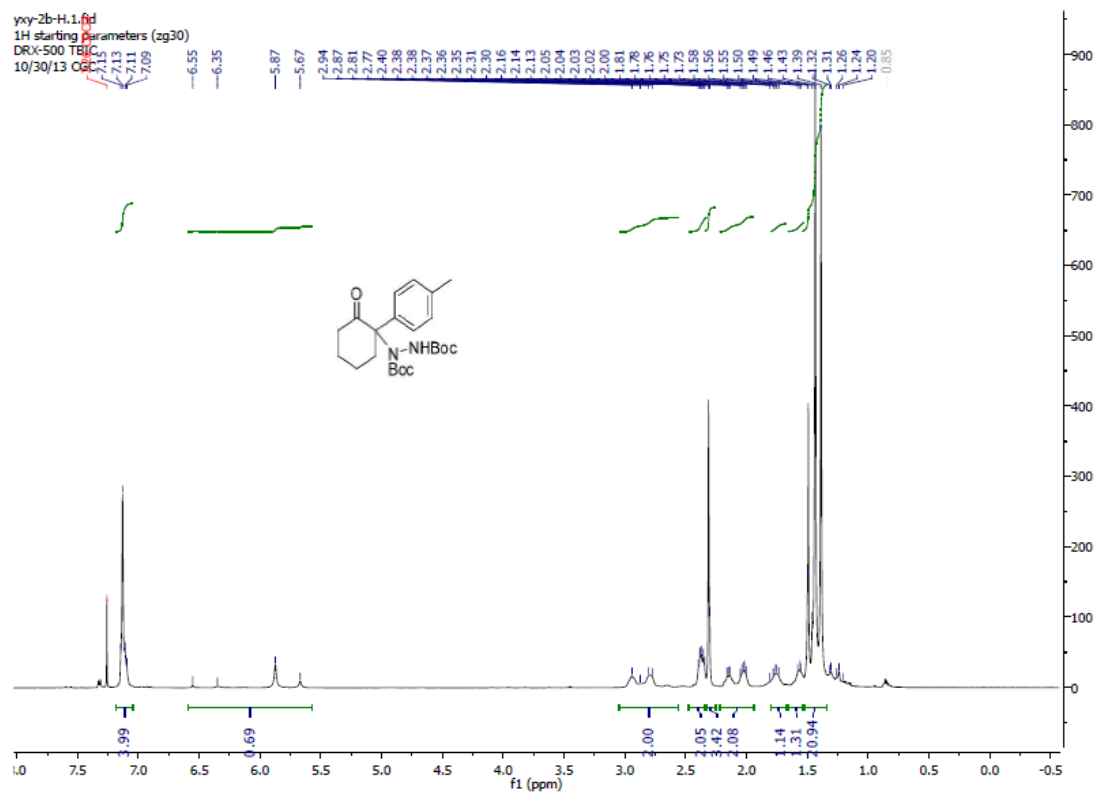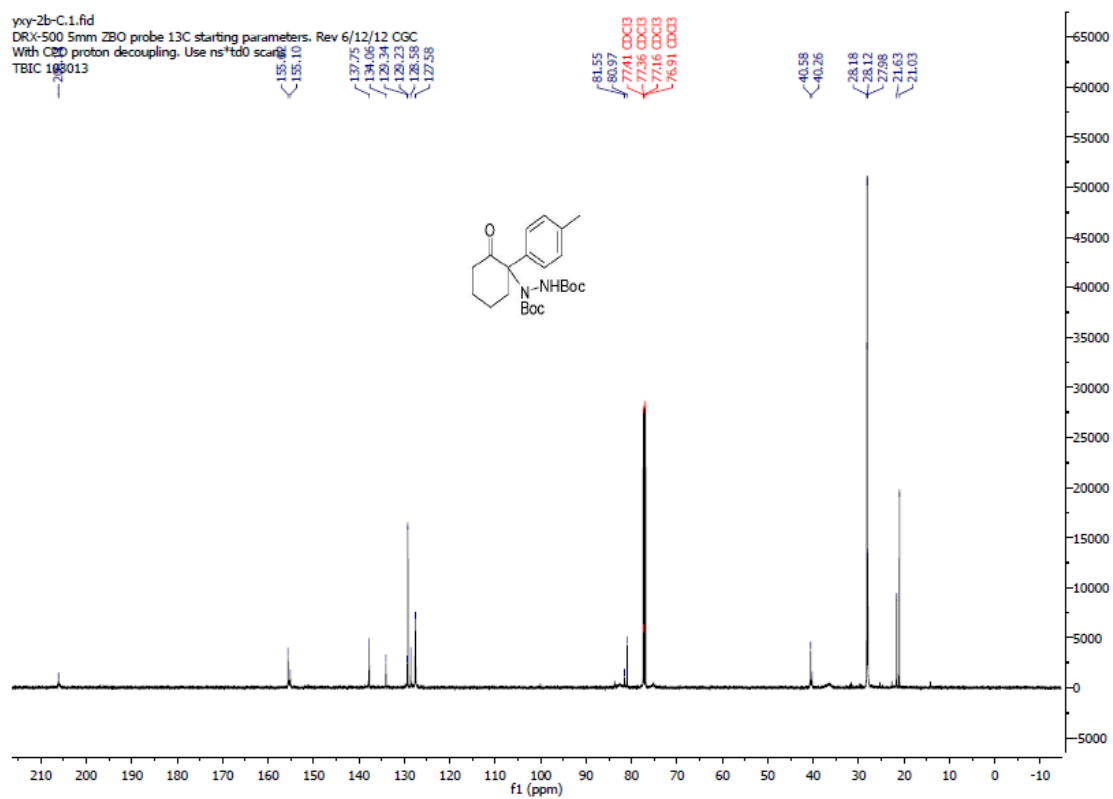

(S)-di-tert-butyl 1-(1-(naphthalen-2-yl)-2-oxocyclohexyl)hydrazine-1,2-dicarboxylate (**2c**)

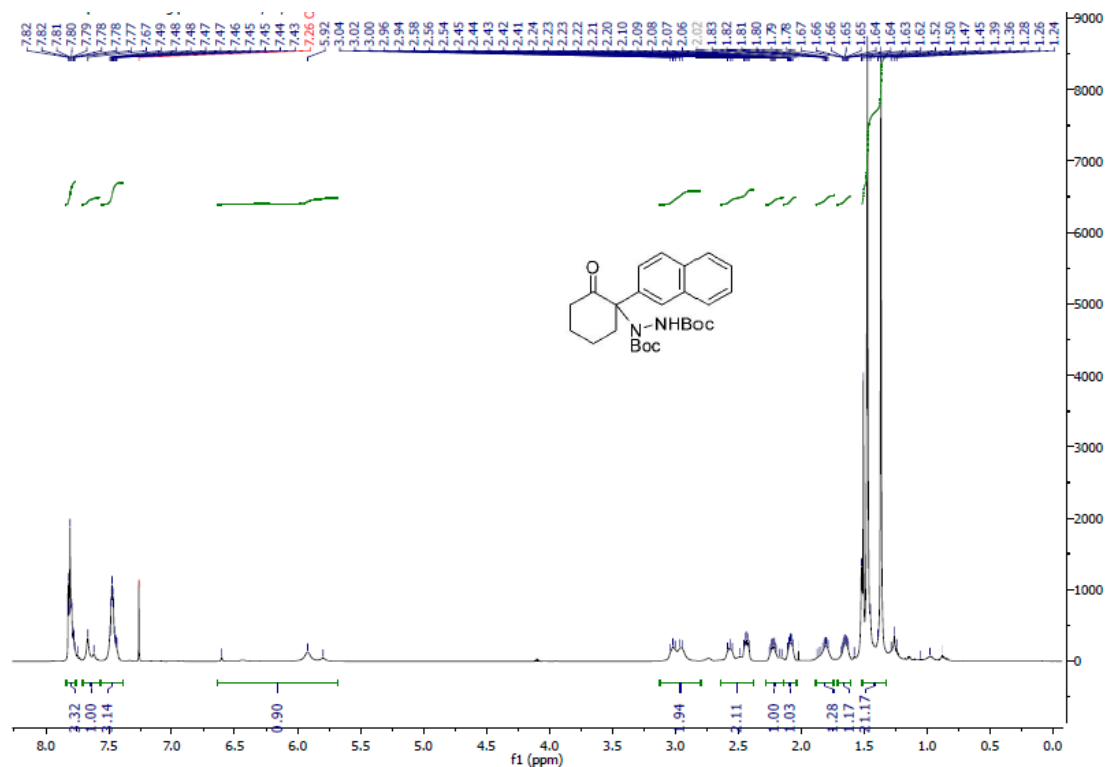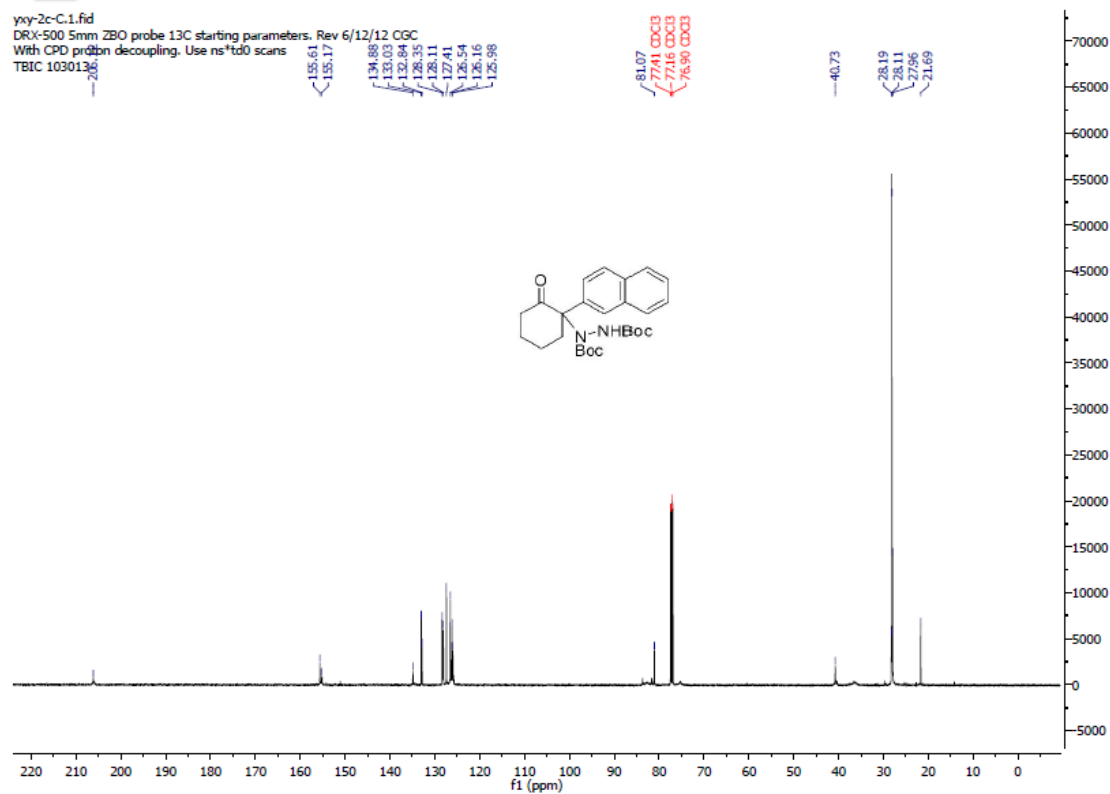



(S)-di-tert-butyl 1-(1-(3-methoxyphenyl)-2-oxocyclohexyl)hydrazine-1,2-dicarboxylate (**2e**)

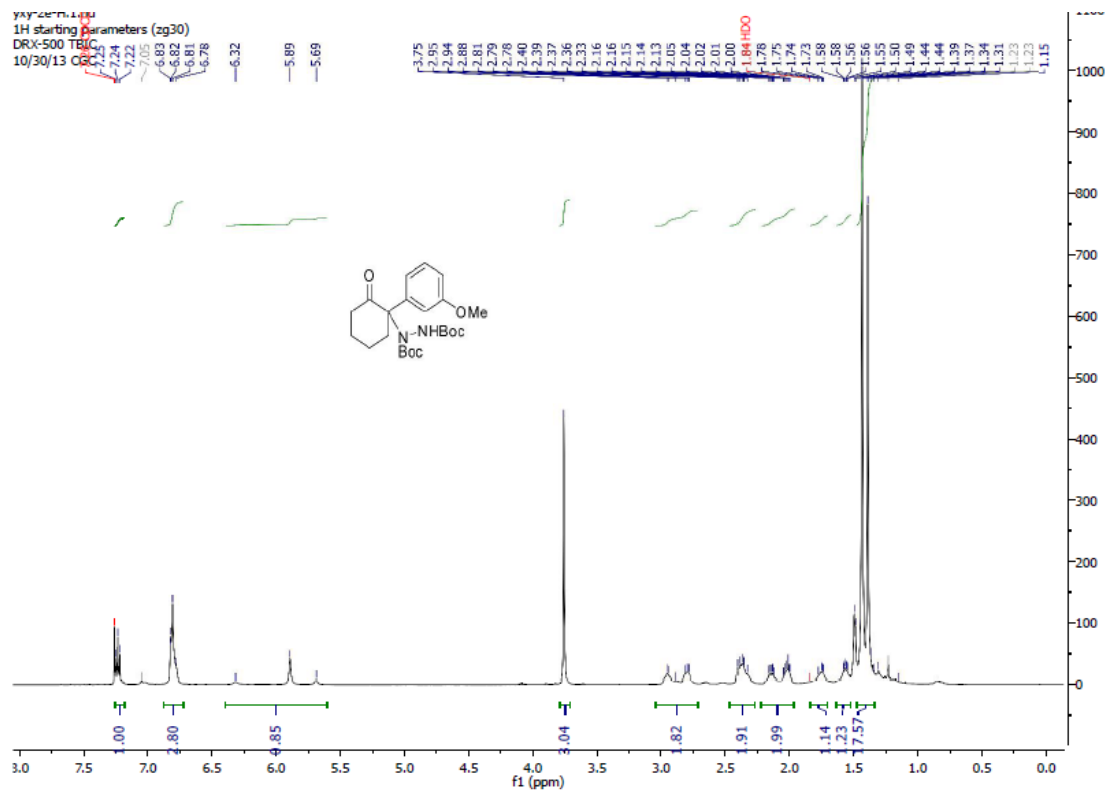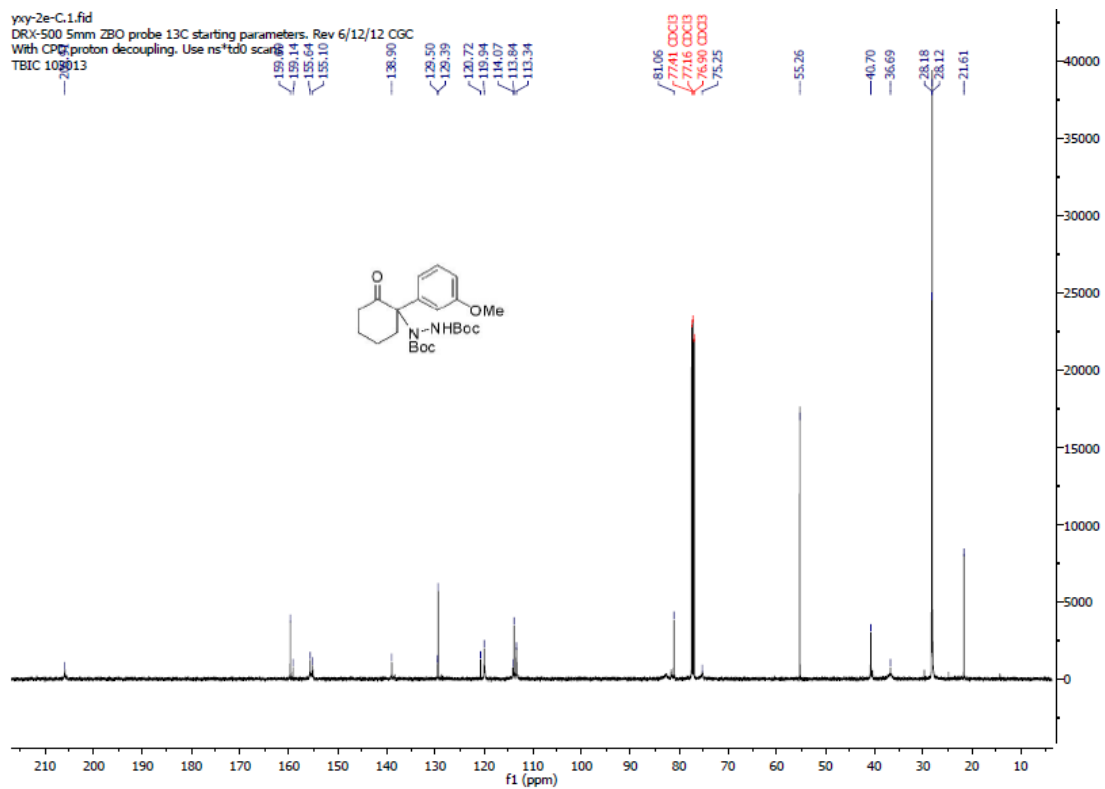

(S)-di-tert-butyl 1-(1-(4-bromophenyl)-2-oxocyclohexyl)hydrazine-1,2-dicarboxylate (**2f**)

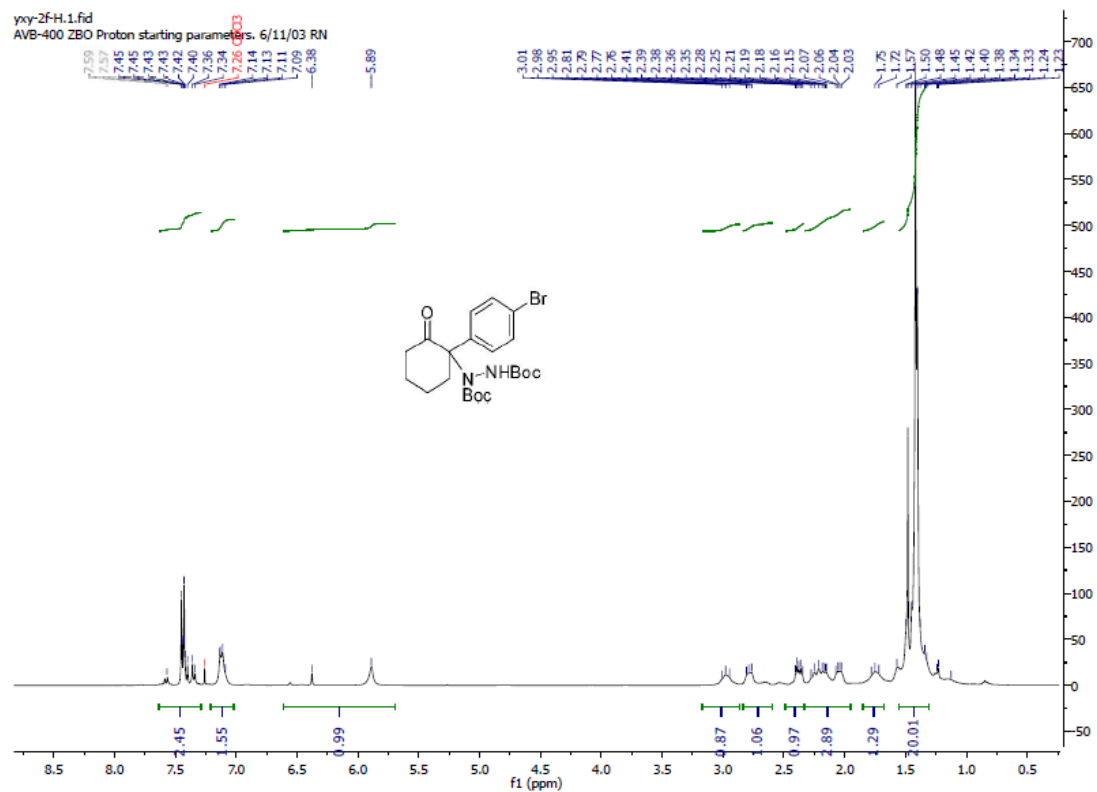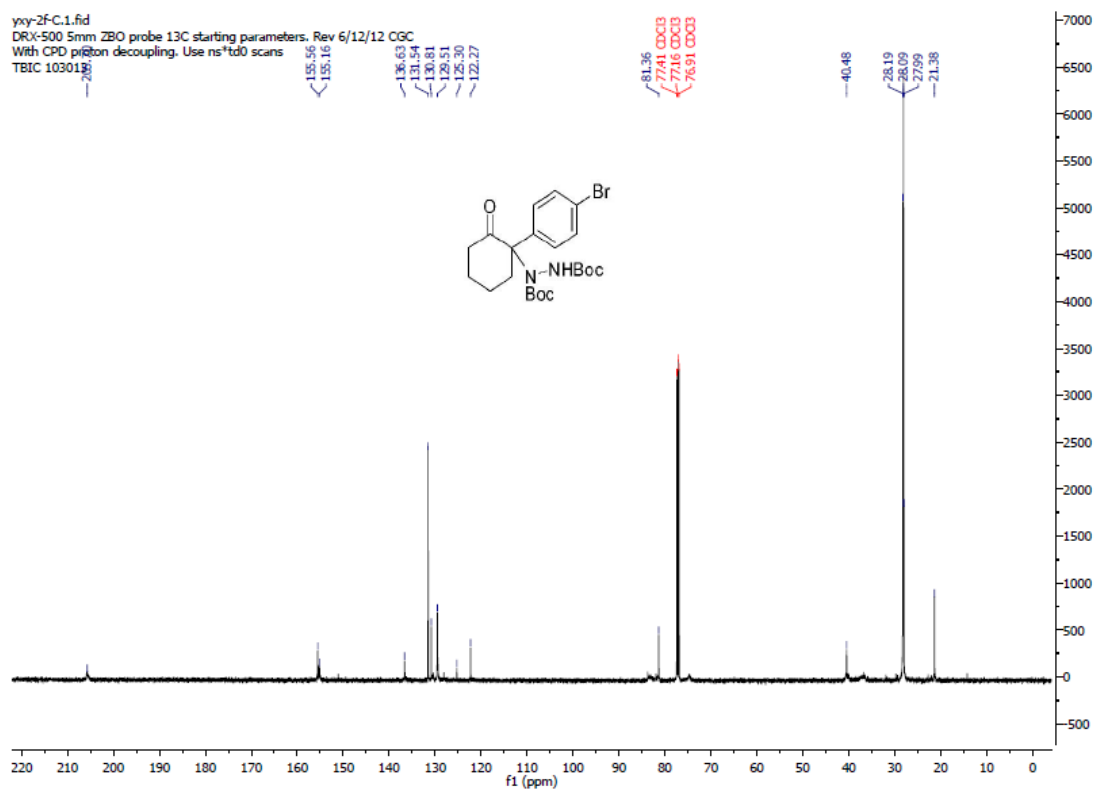



(*S*)-di-*tert*-butyl 1-(2-oxo-1-(4-(trifluoromethyl)phenyl)cyclohexyl)hydrazine-1,2-dicarboxylate  
**(2g)**

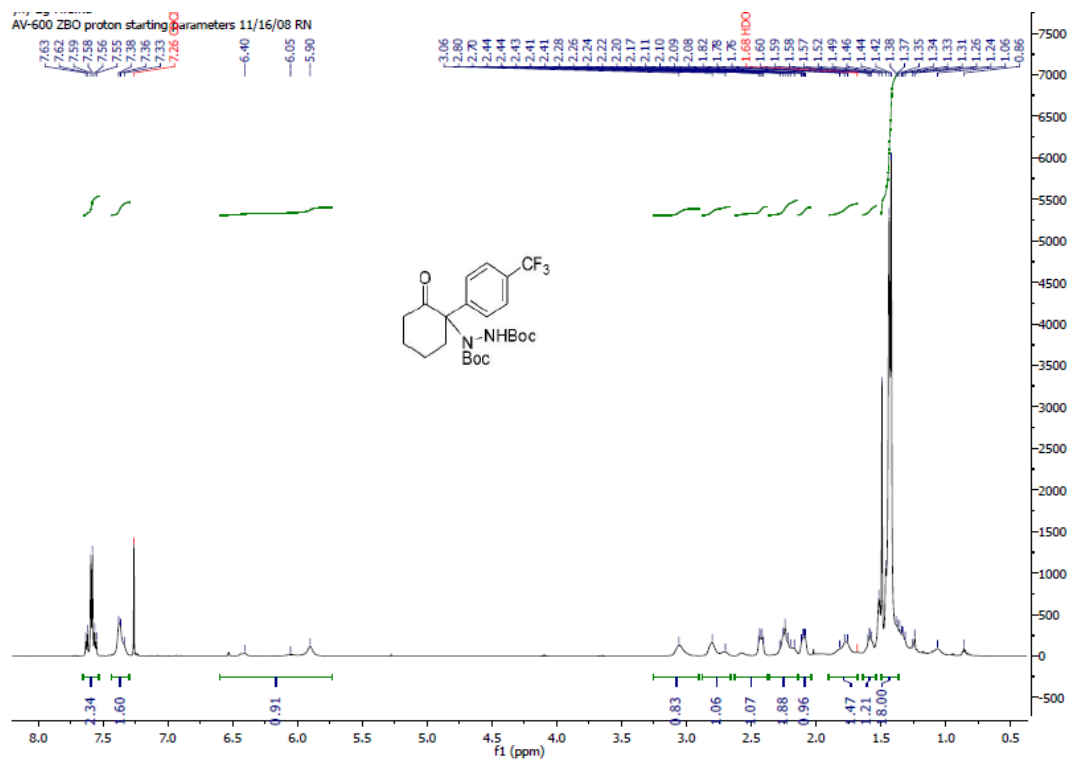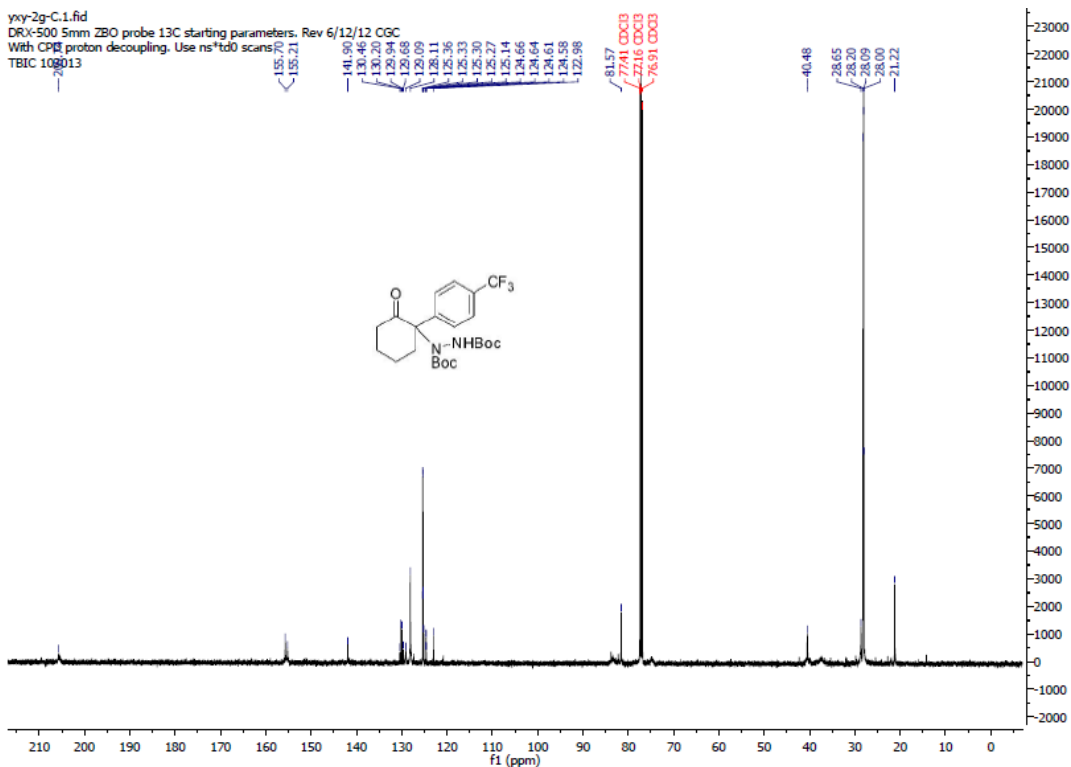

(S)-di-*tert*-butyl 1-(1-(4-(*tert*-butoxycarbonyl)phenyl)-2-oxocyclohexyl)hydrazine-1,2-dicarboxylate (**2h**)

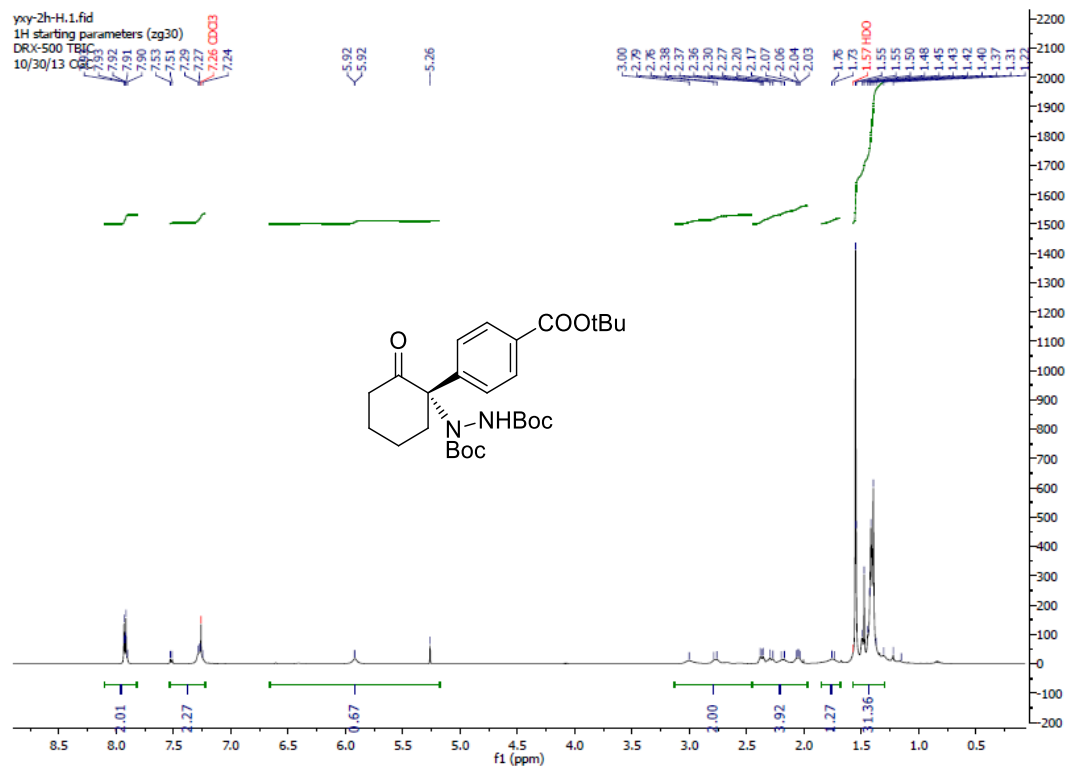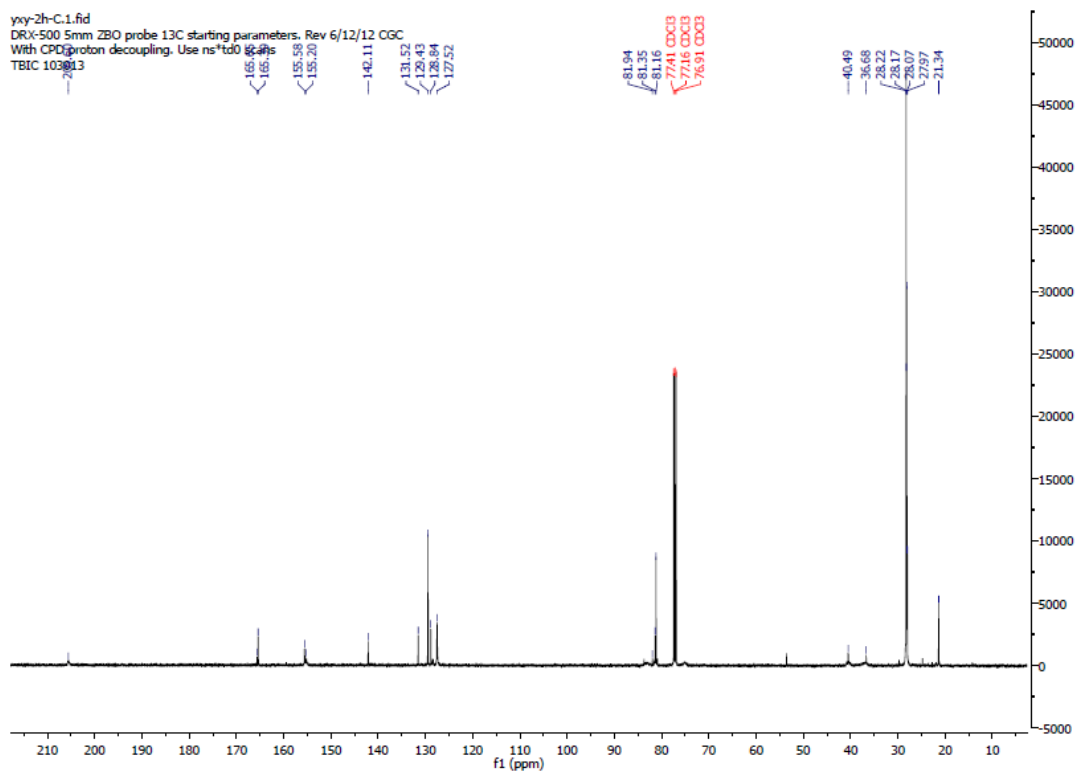

(S)-di-tert-butyl 1-(2-oxo-1-(o-tolyl)cyclohexyl)hydrazine-1,2-dicarboxylate (**2i**)

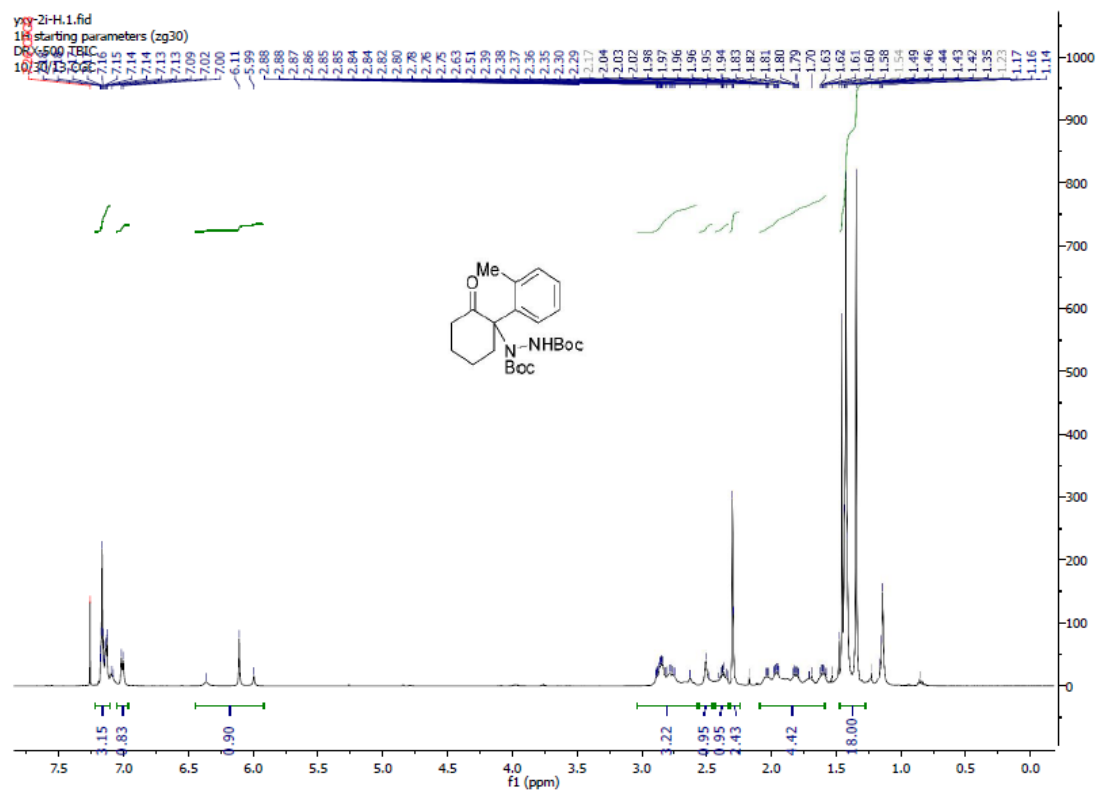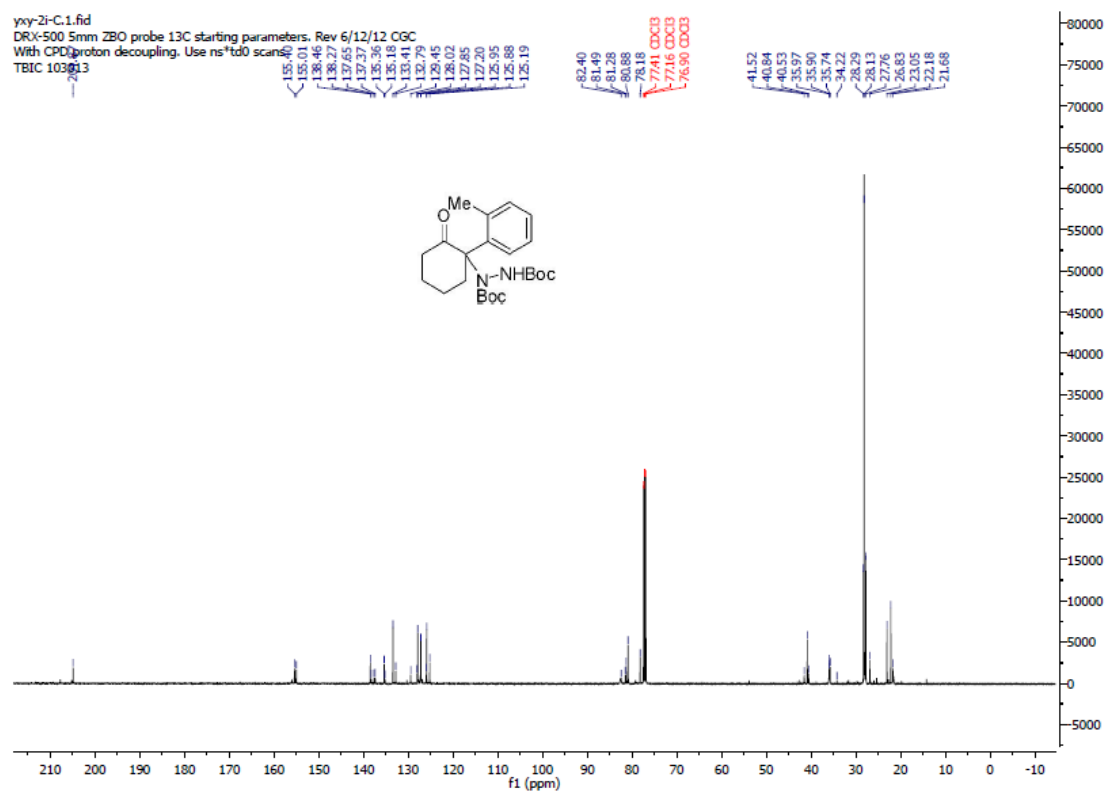

(S)-di-tert-butyl 1-(1-(2-chlorophenyl)-2-oxocyclohexyl)hydrazine-1,2-dicarboxylate (**2j**)

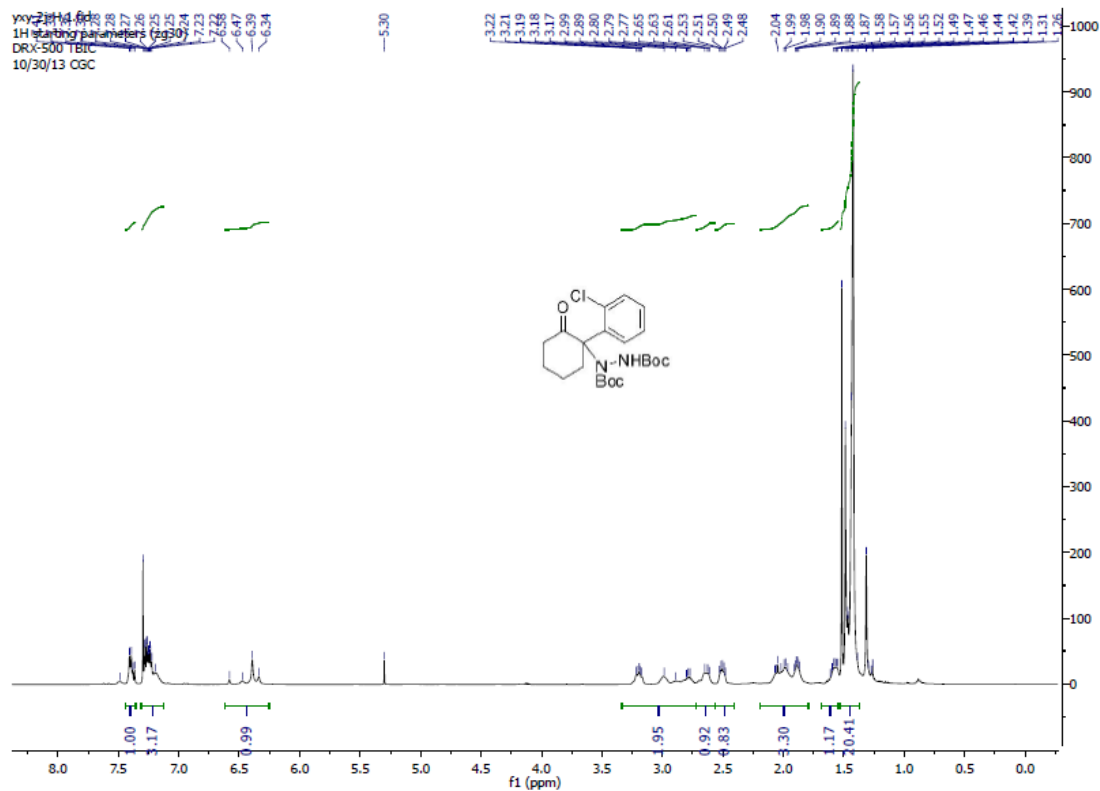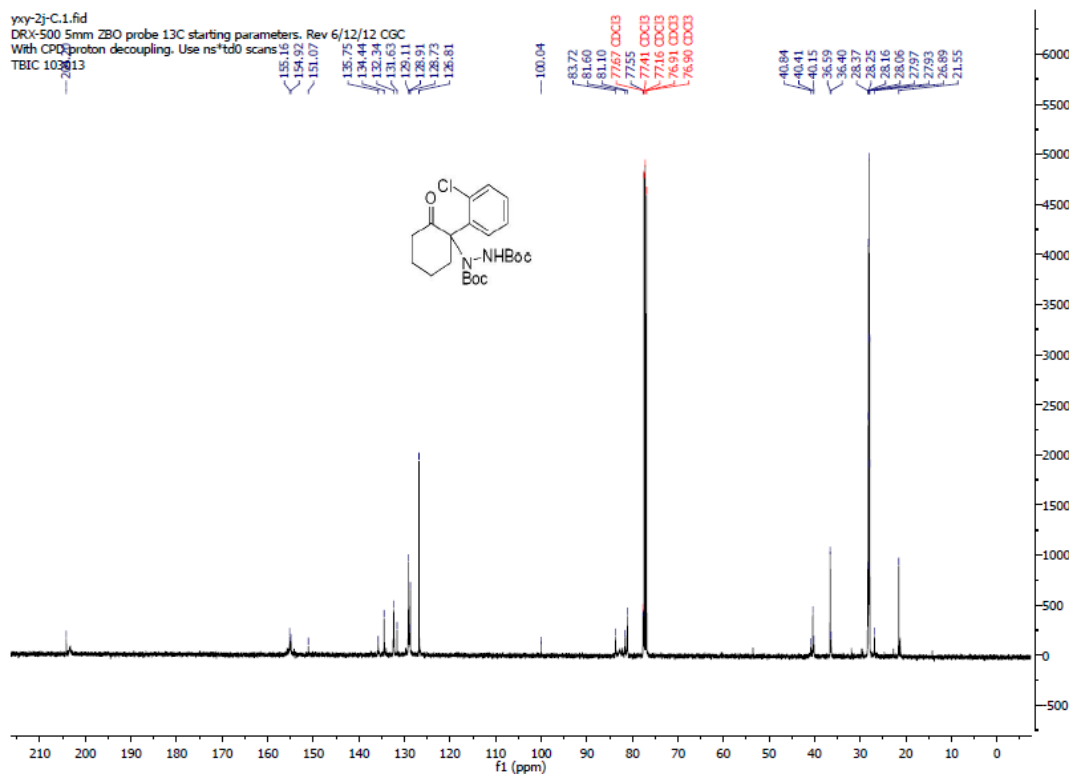

(S)-di-tert-butyl 1-(2-oxo-1-phenylcyclopentyl)hydrazine-1,2-dicarboxylate (**2k**)

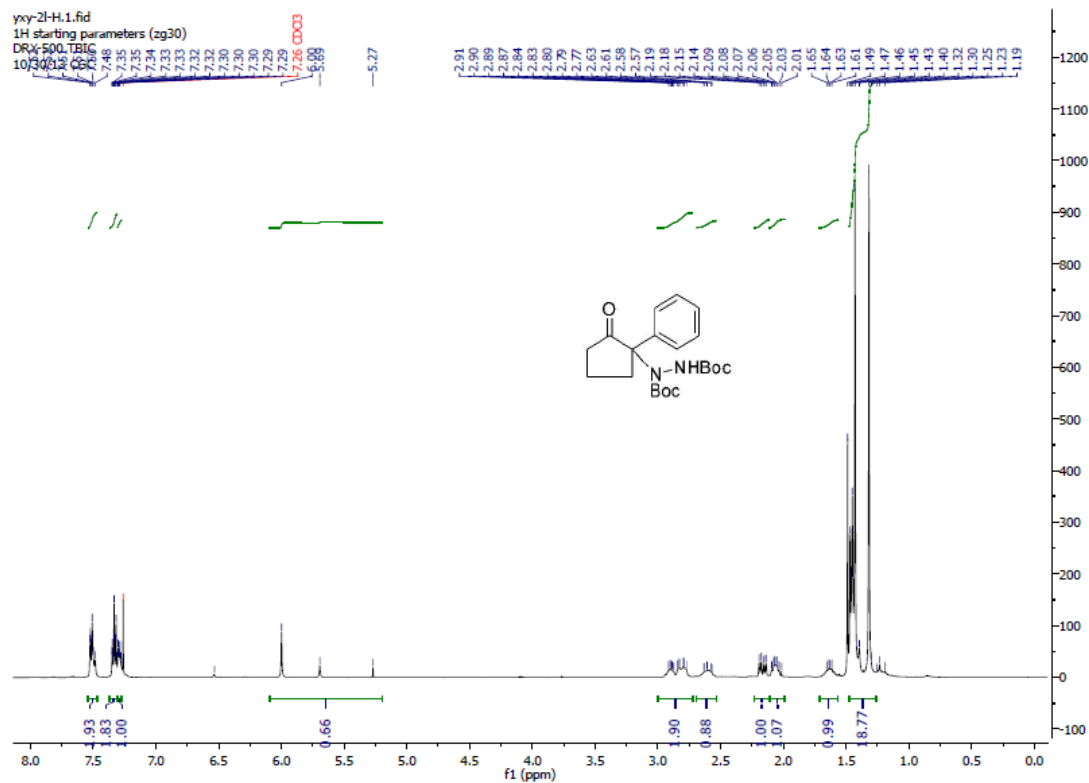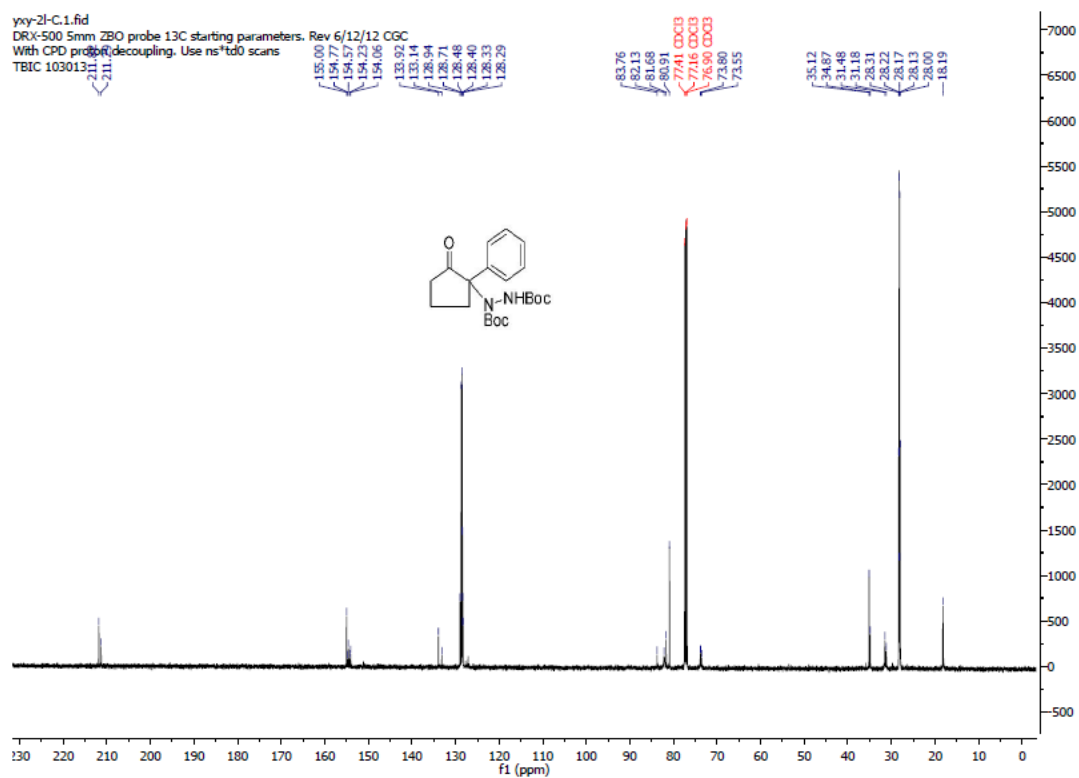





(*S,E*)-di-*tert*-butyl 1-(2-oxo-1-styrylcyclohexyl)hydrazine-1,2-dicarboxylate (**2n**)

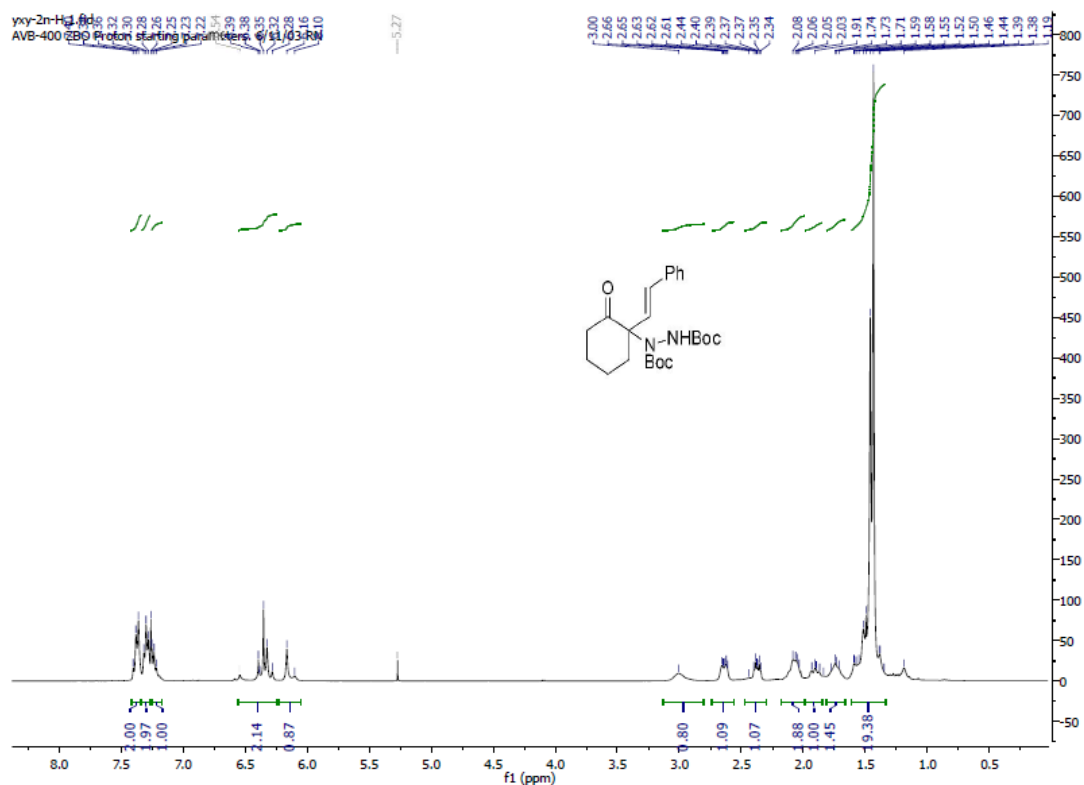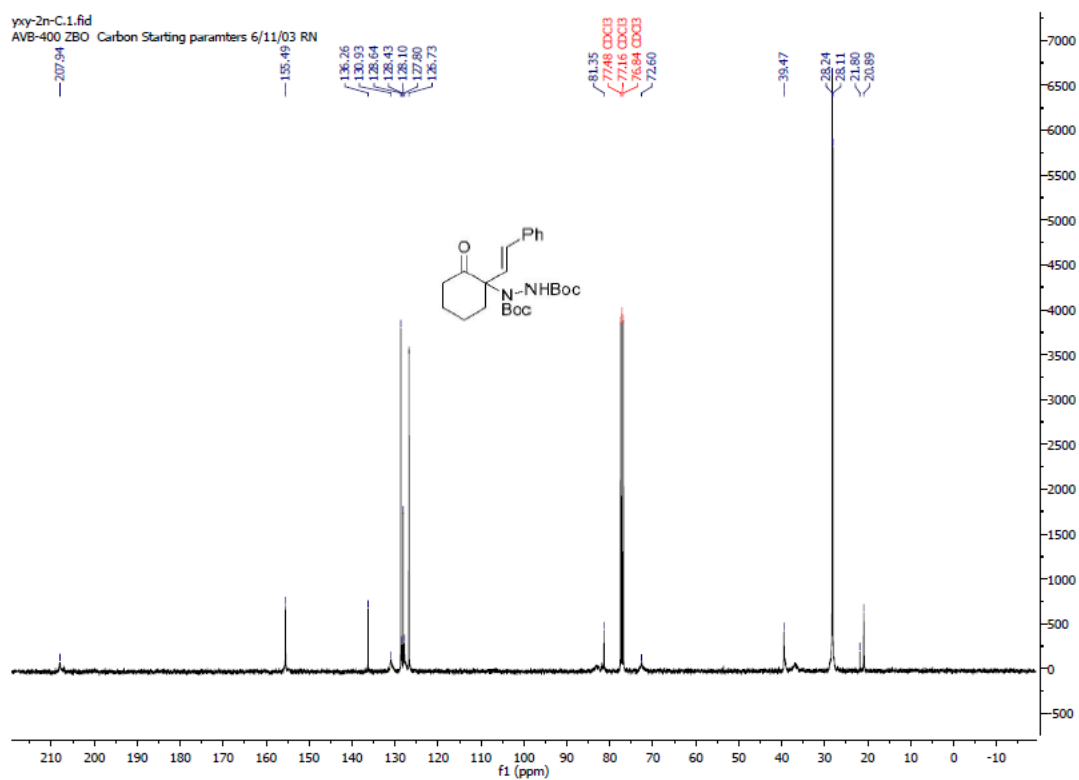



(S)-di-tert-butyl 1-(2-oxo-1-vinylcyclohexyl)hydrazine-1,2-dicarboxylate (**2o**)

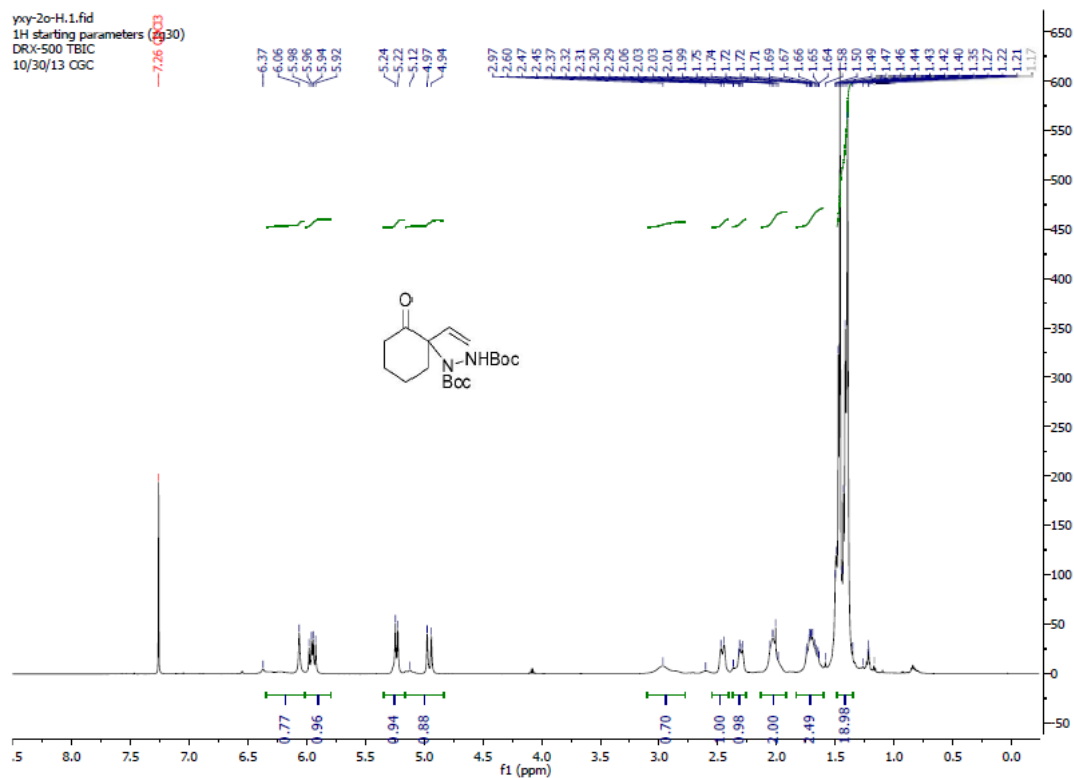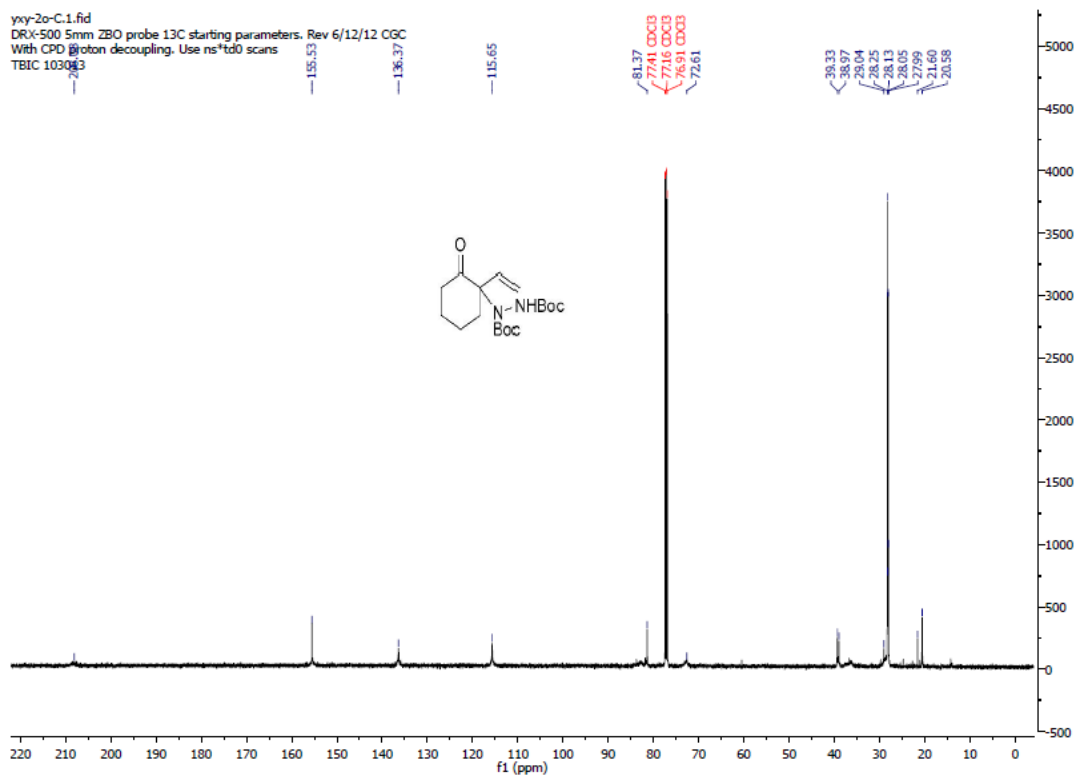



(*S,Z*)-di-*tert*-butyl 1-(2-oxo-1-styrylcyclohexyl)hydrazine-1,2-dicarboxylate (**2q**)

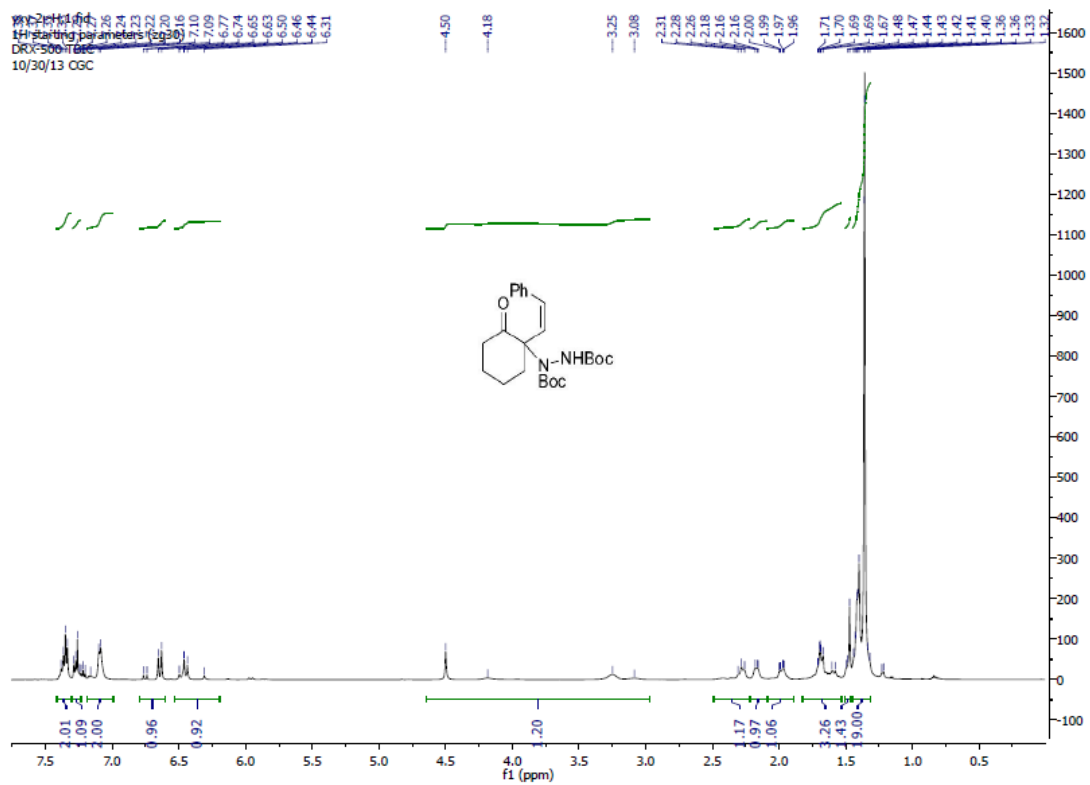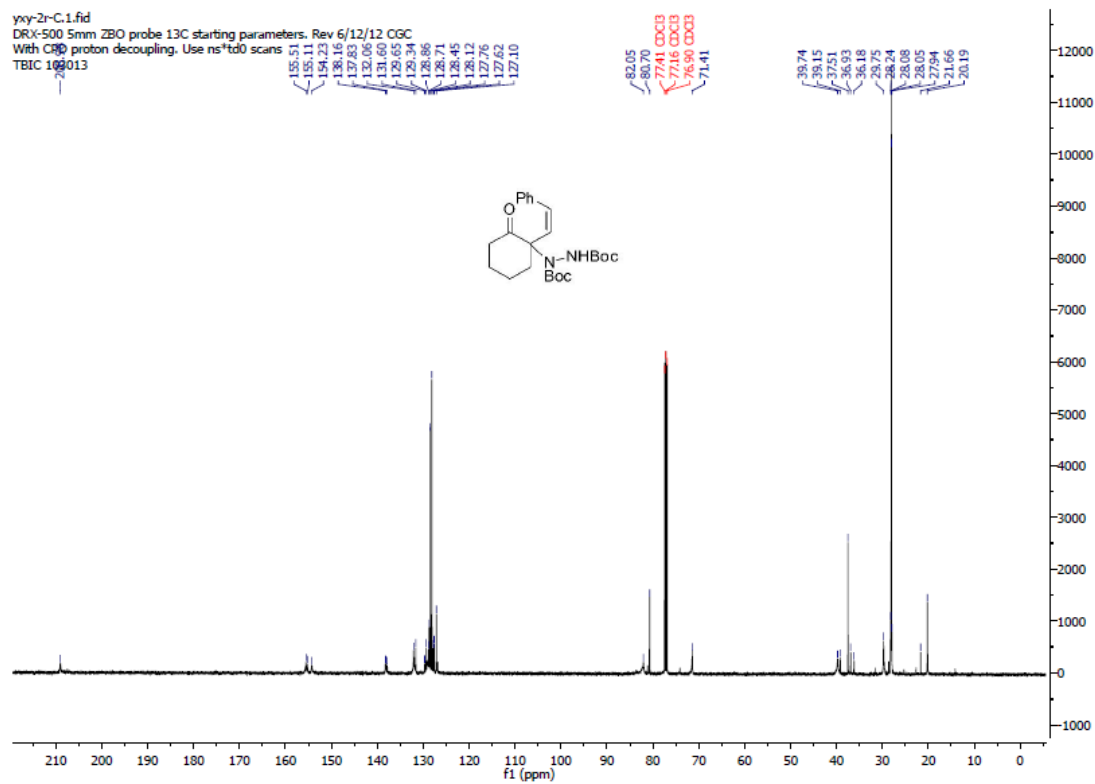





(*S,E*)-di-*tert*-butyl 1-(5,5-dimethyl-2-oxo-1-styrylcyclohexyl)hydrazine-1,2-dicarboxylate (**2t**)

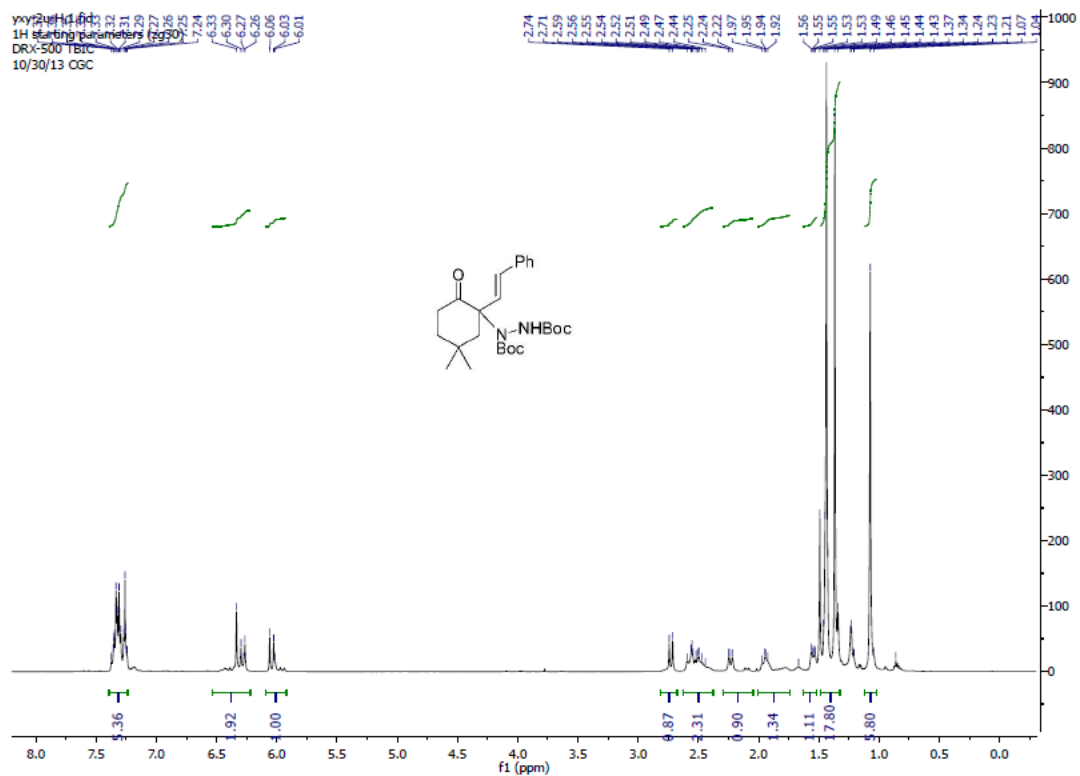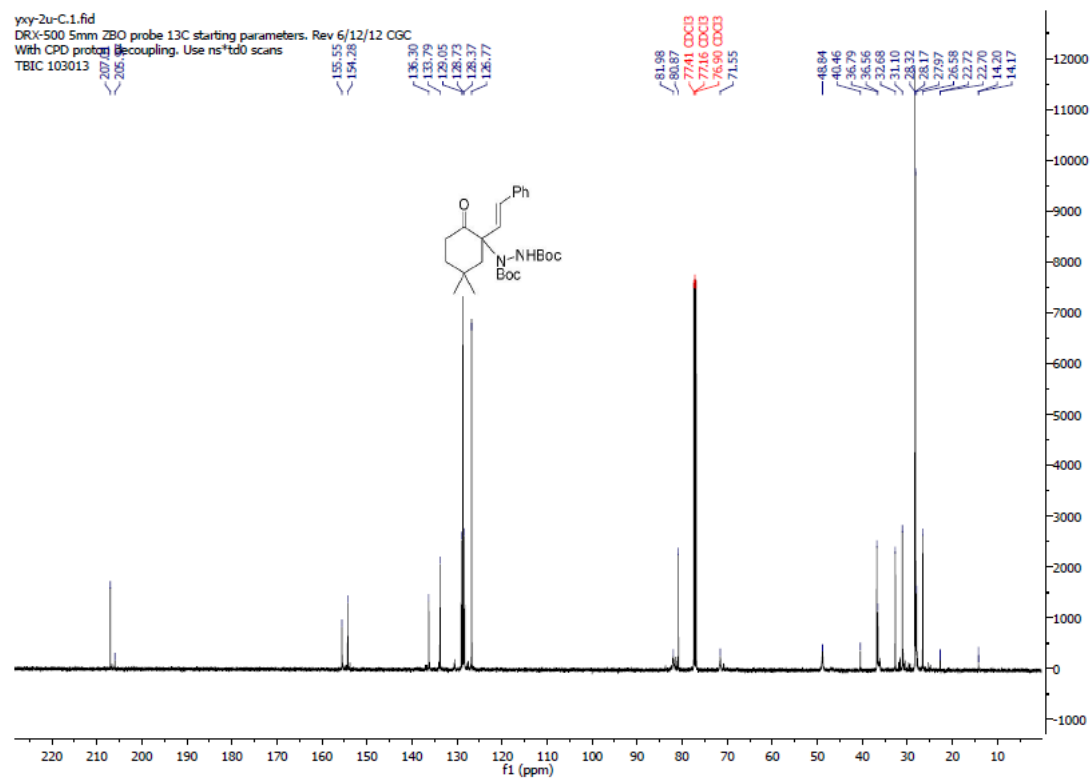

(*S,E*)-di-*tert*-butyl 1-(2-oxo-1-styrylcycloheptyl)hydrazine-1,2-dicarboxylate (**2u**)

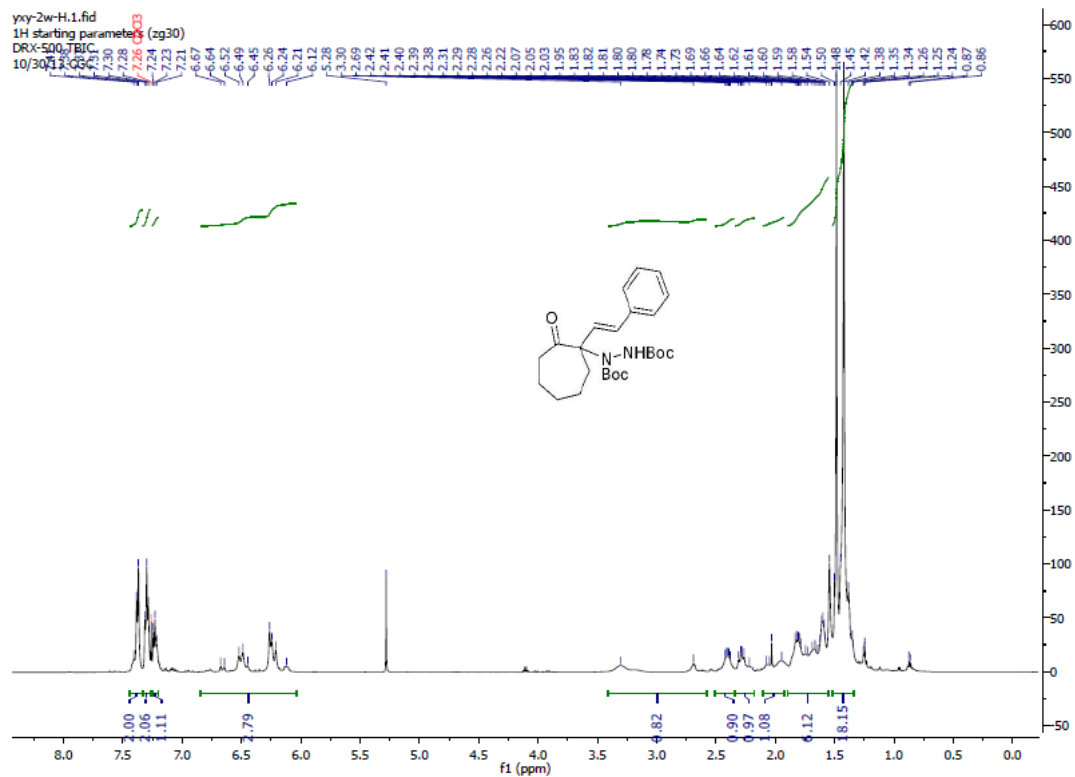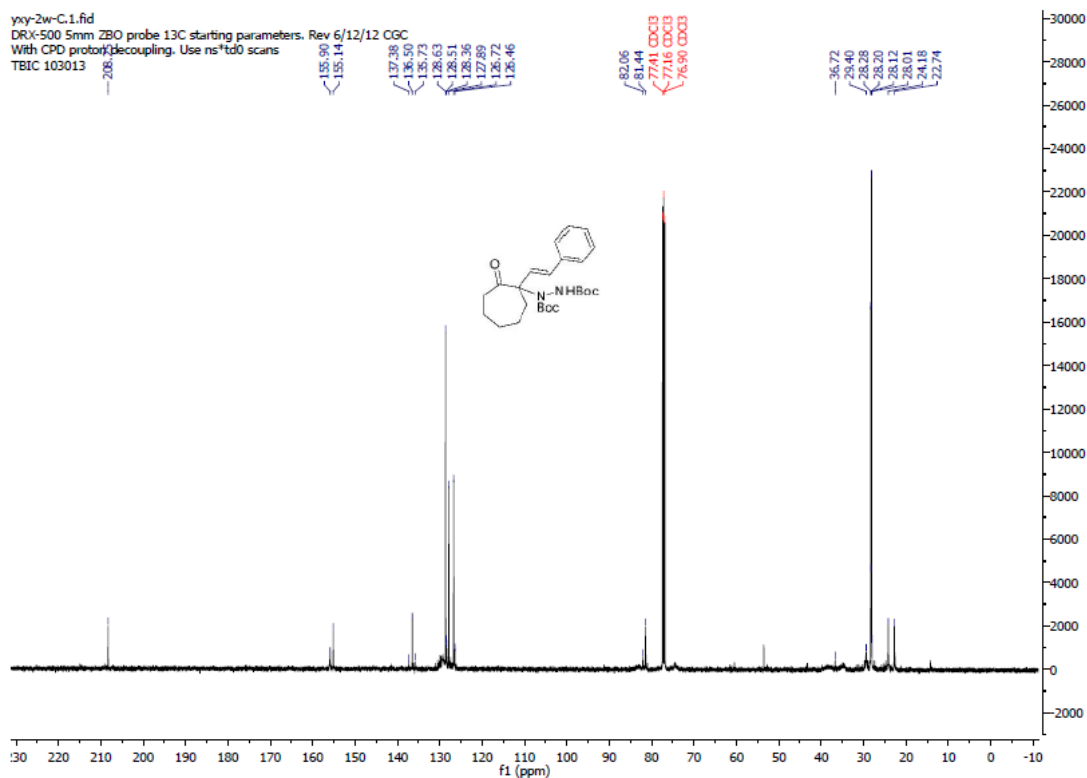

(*S,E*)-di-*tert*-butyl 1-(2-oxo-1-styrylcyclopentyl)hydrazine-1,2-dicarboxylate (**2v**)

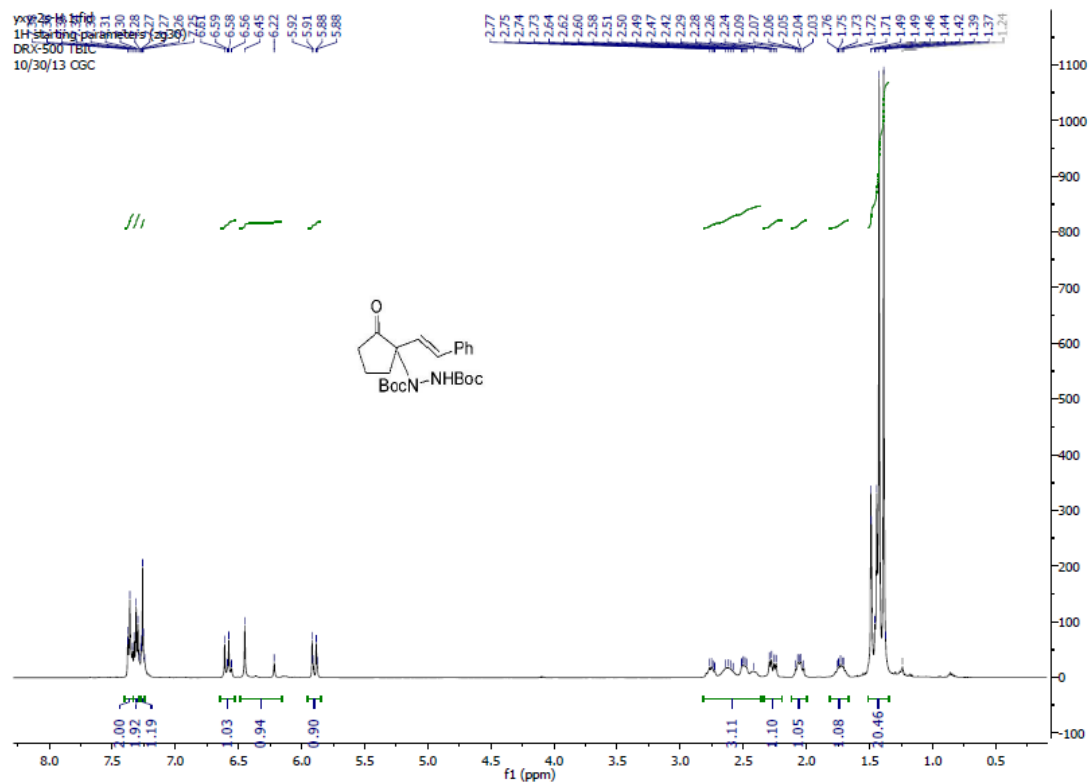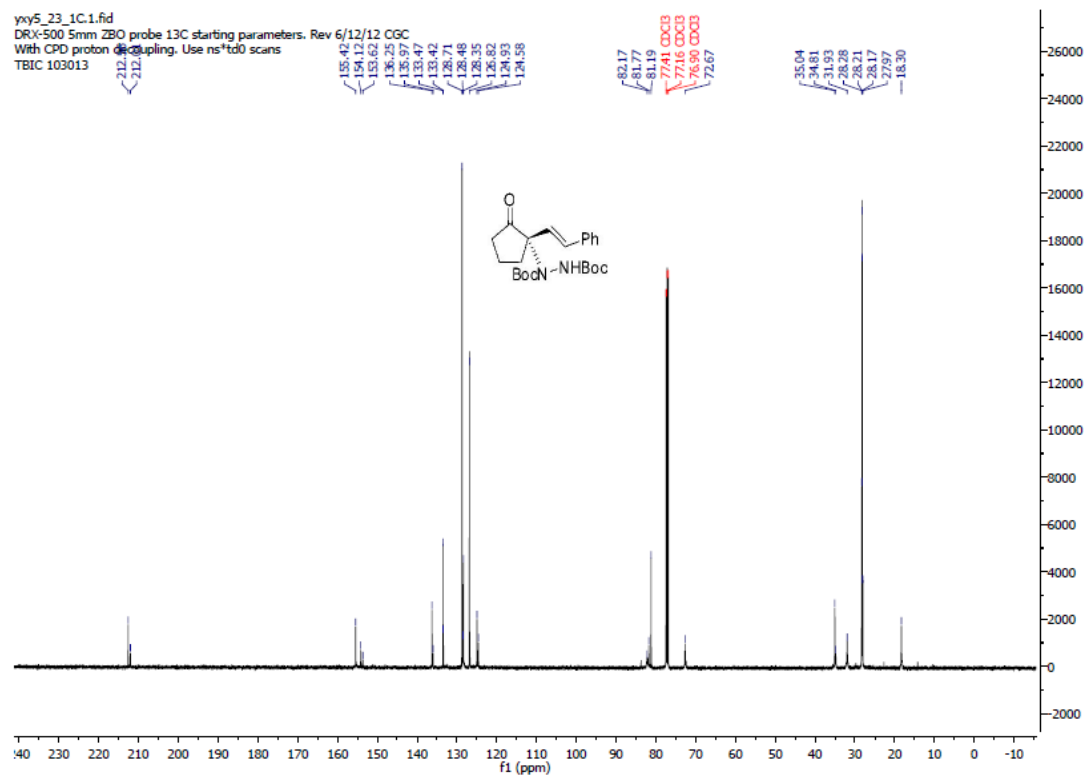



(S)-di-tert-butyl 1-(2-oxo-1-(phenylethynyl)cyclohexyl)hydrazine-1,2-dicarboxylate (**2w**)

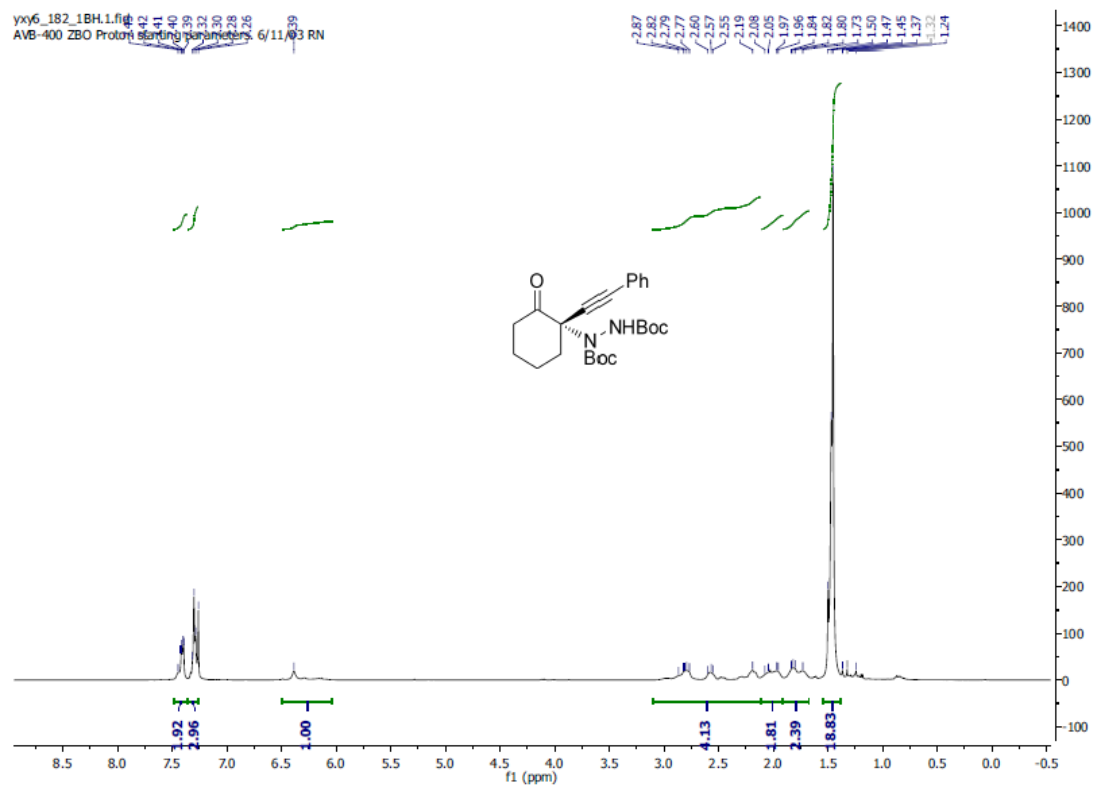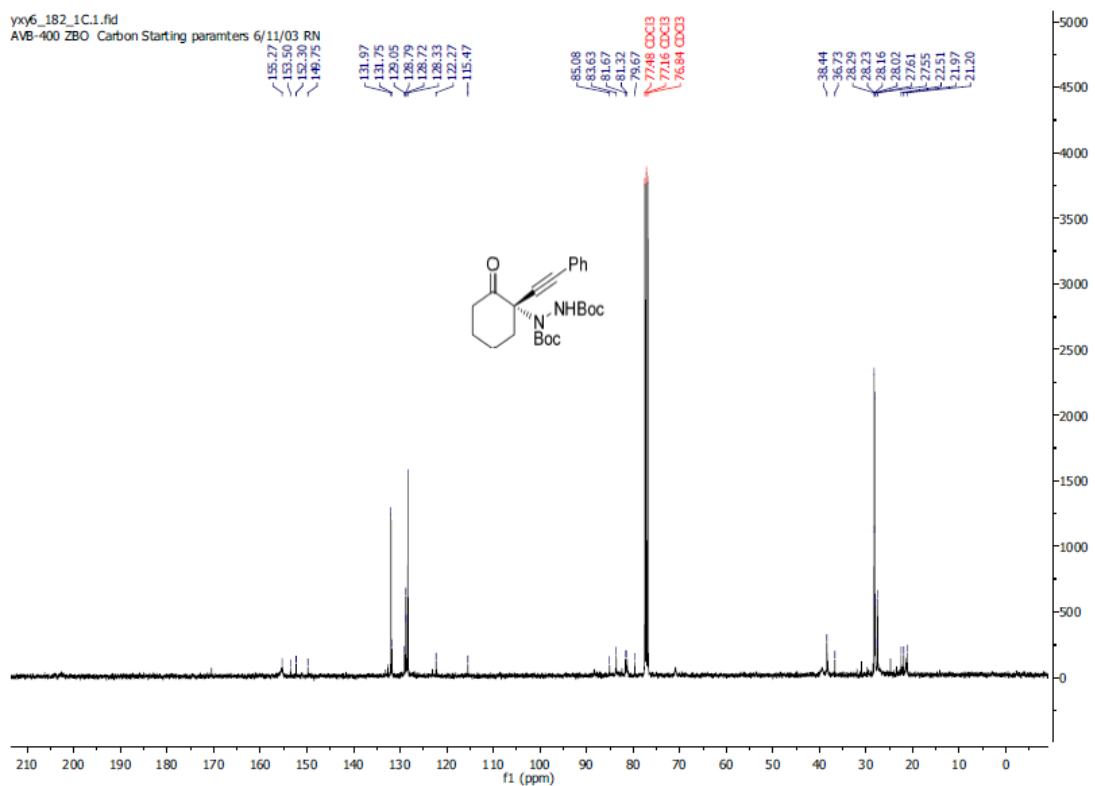



(R)-N-(1-methyl-2-oxocyclohexyl)benzamide (S4)

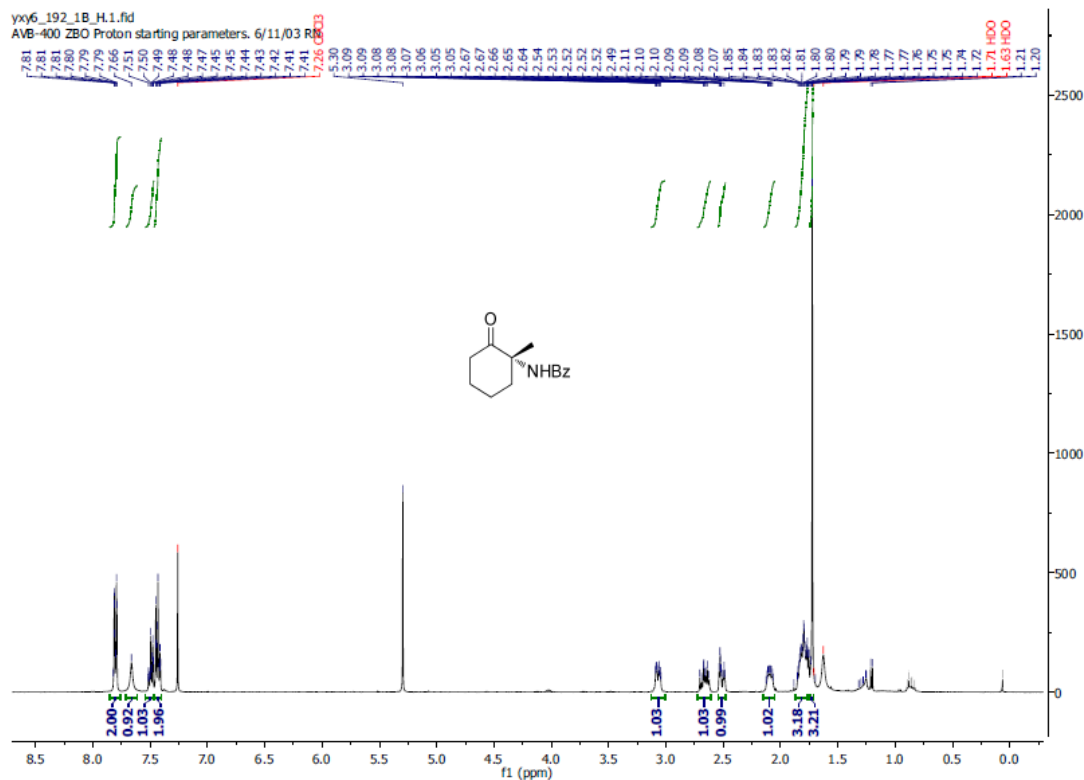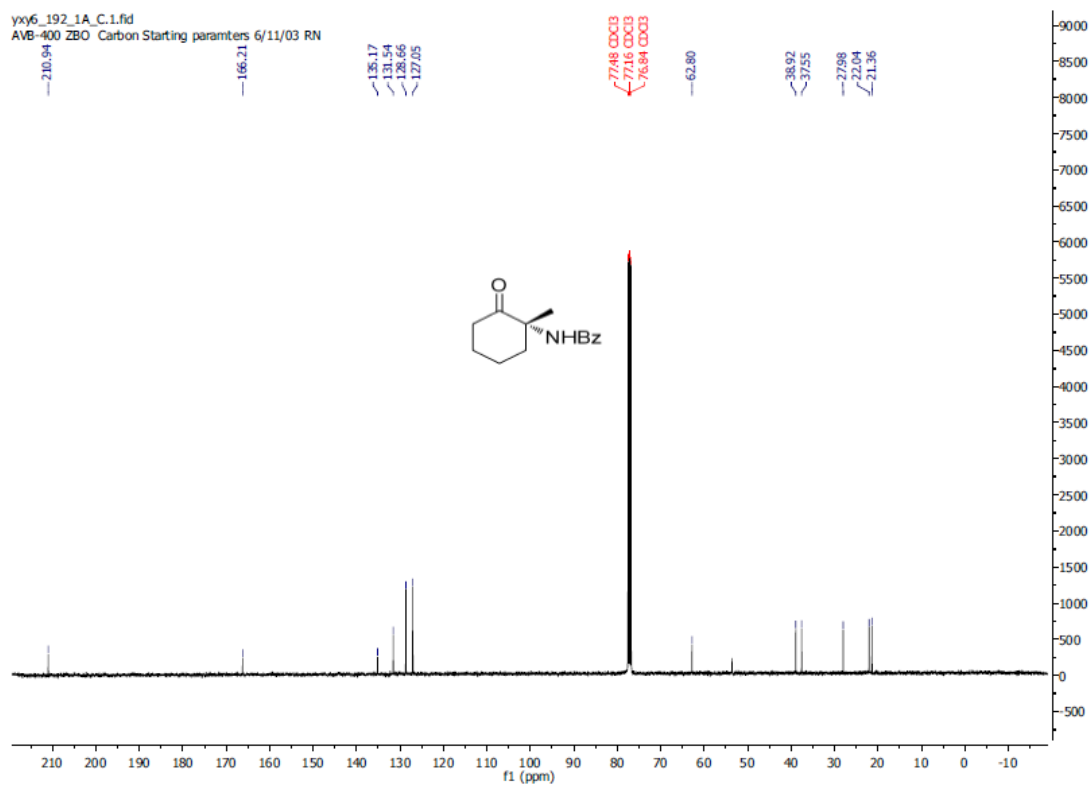

(S)-di-tert-butyl 1-(1-benzyl-2-oxocyclohexyl)hydrazine-1,2-dicarboxylate (**2y**)

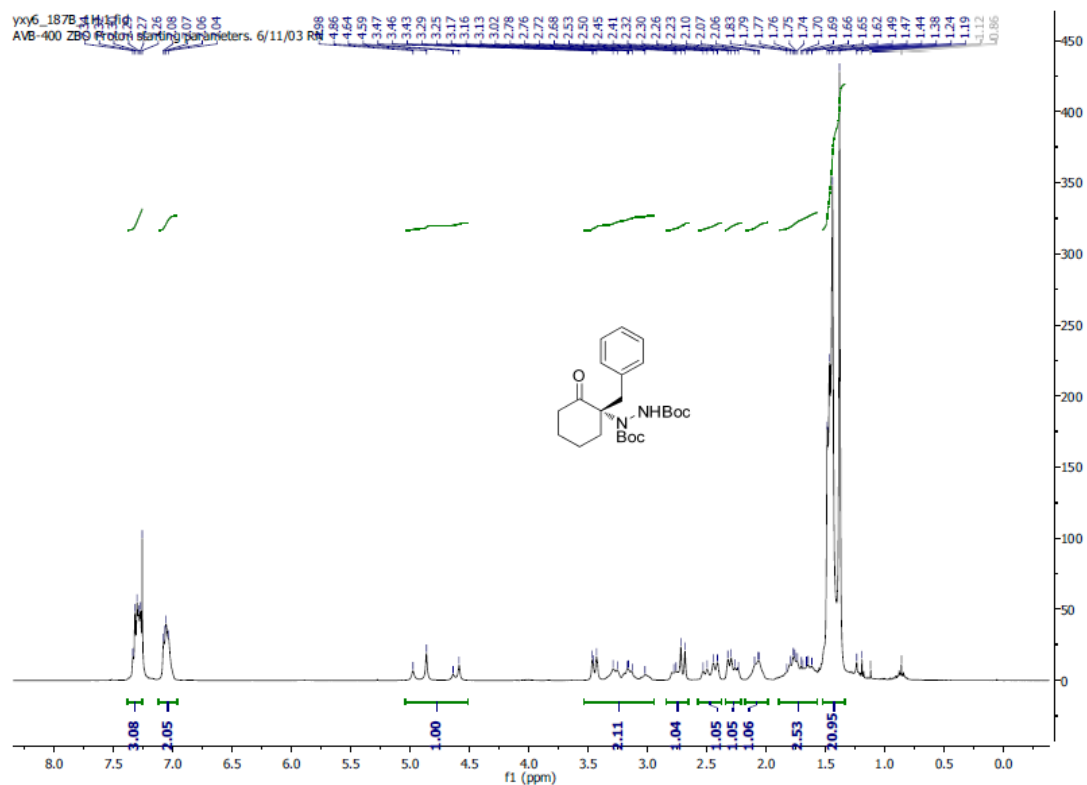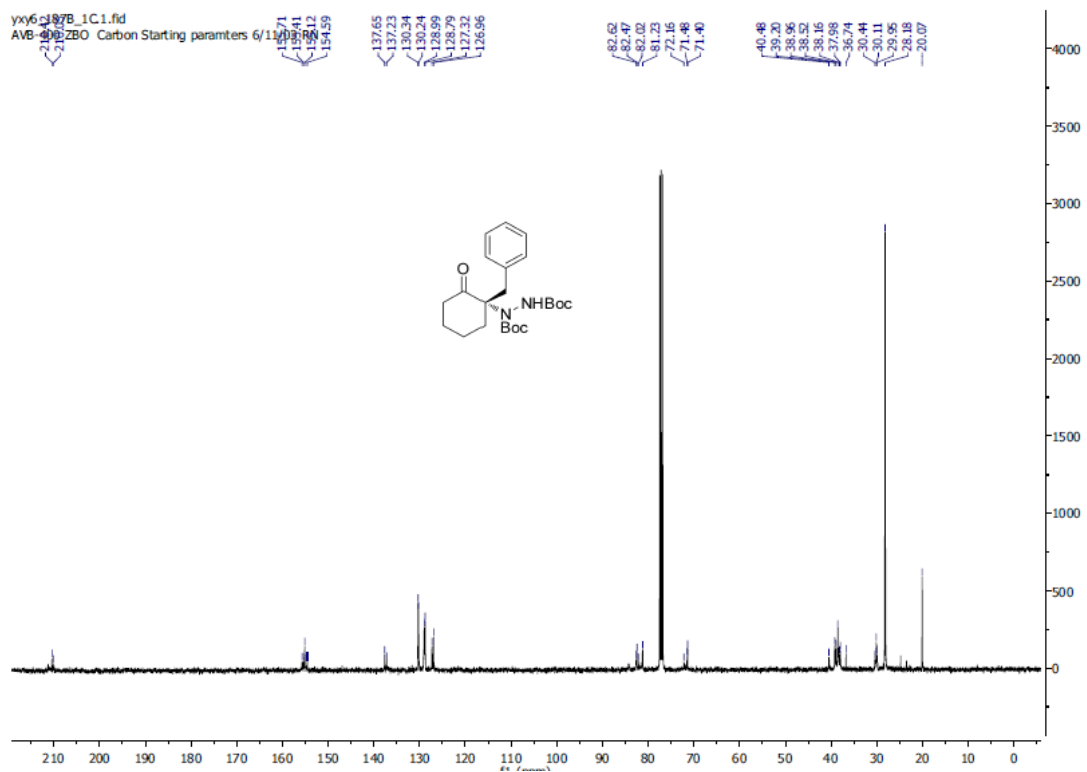

(*R*)-di-*tert*-butyl 1-(2-oxo-1-(thiophen-2-yl)cyclohexyl)hydrazine-1,2-dicarboxylate (**2z**)

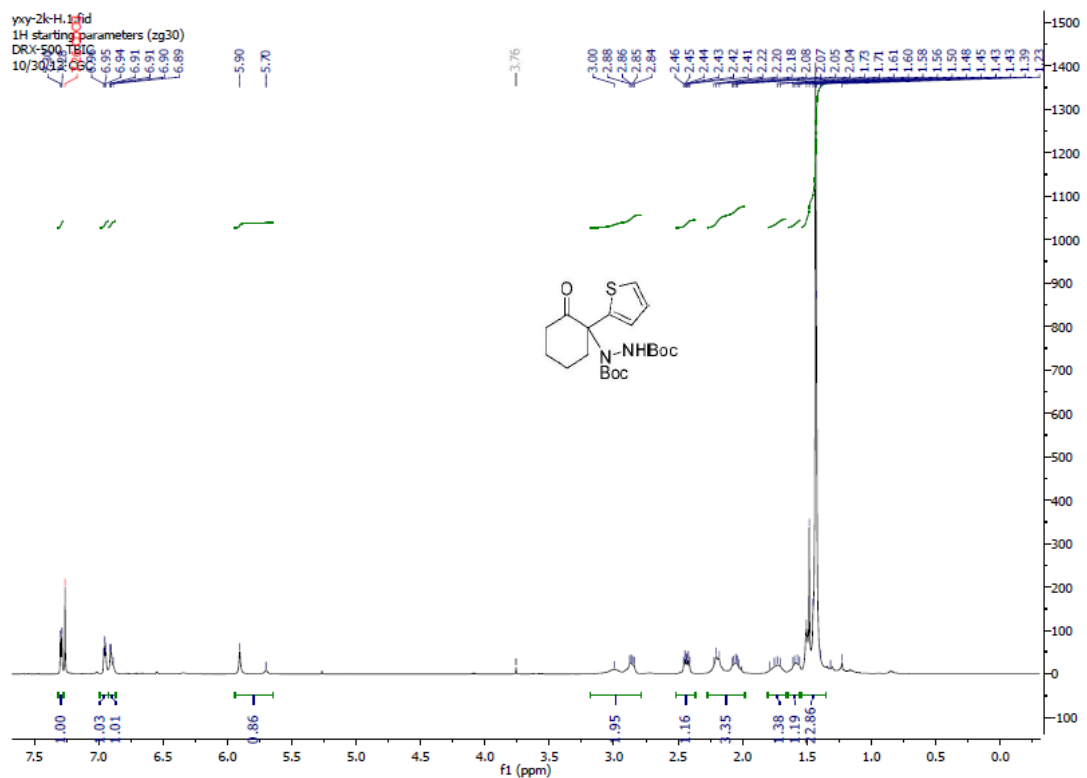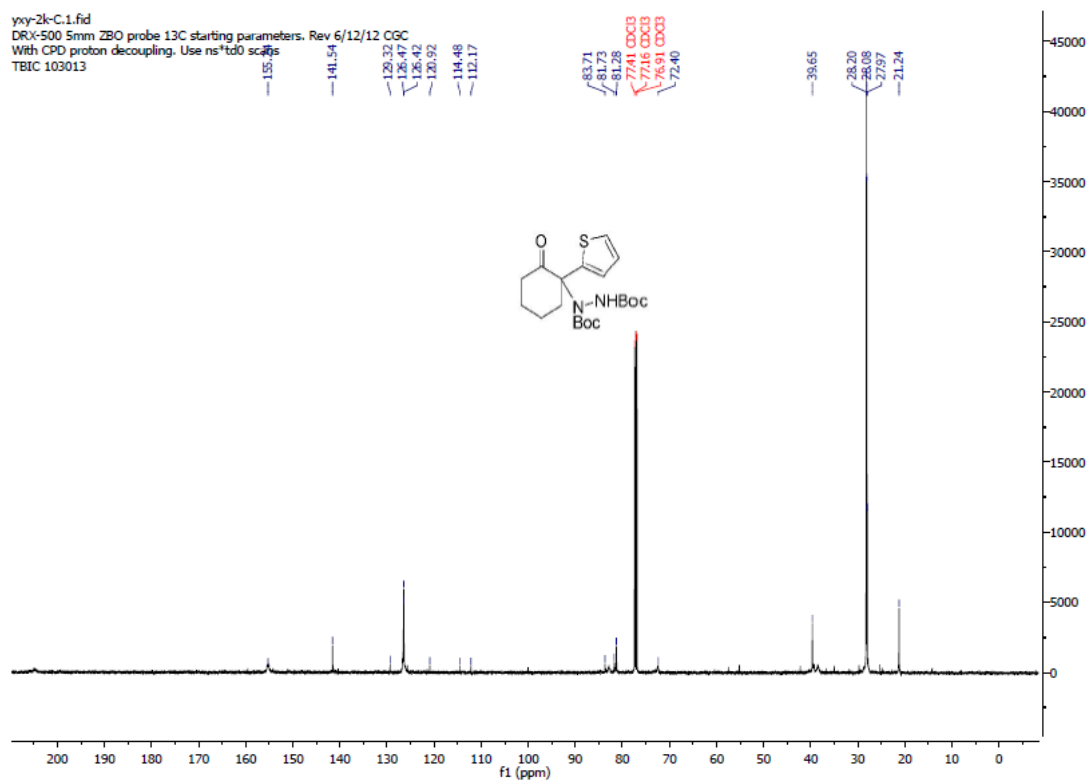

*N*-((1*S*,2*R*)-2-hydroxy-1-phenylcyclohexyl)benzamide (**3a**)

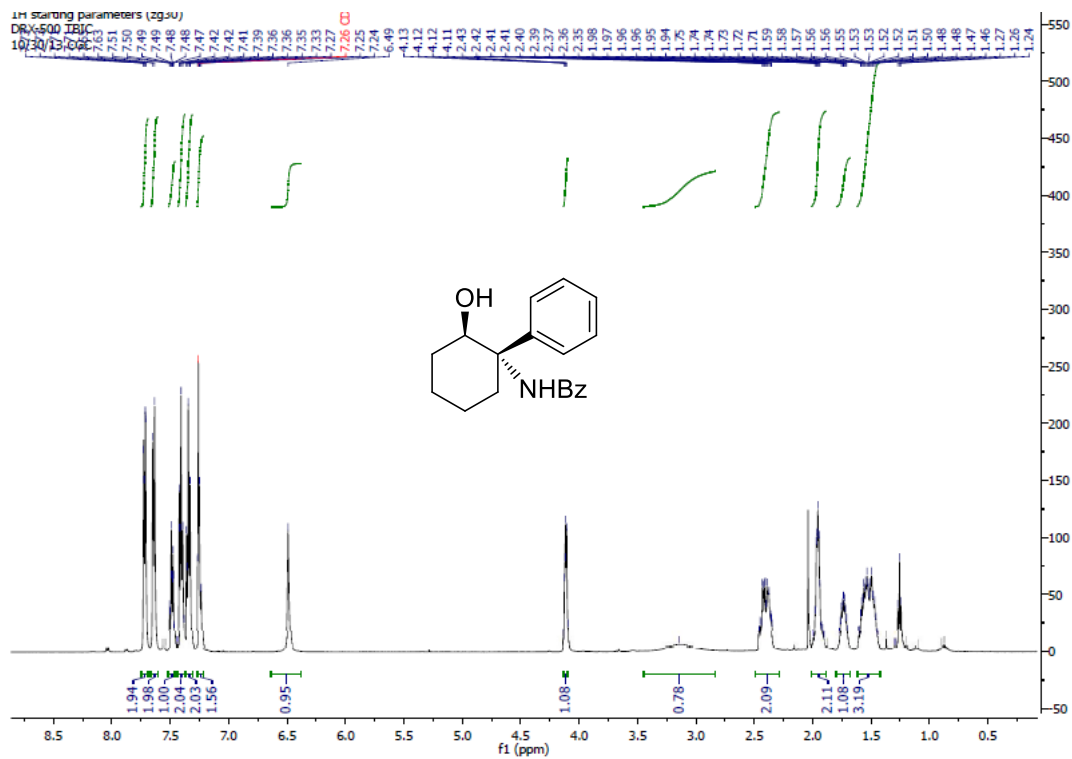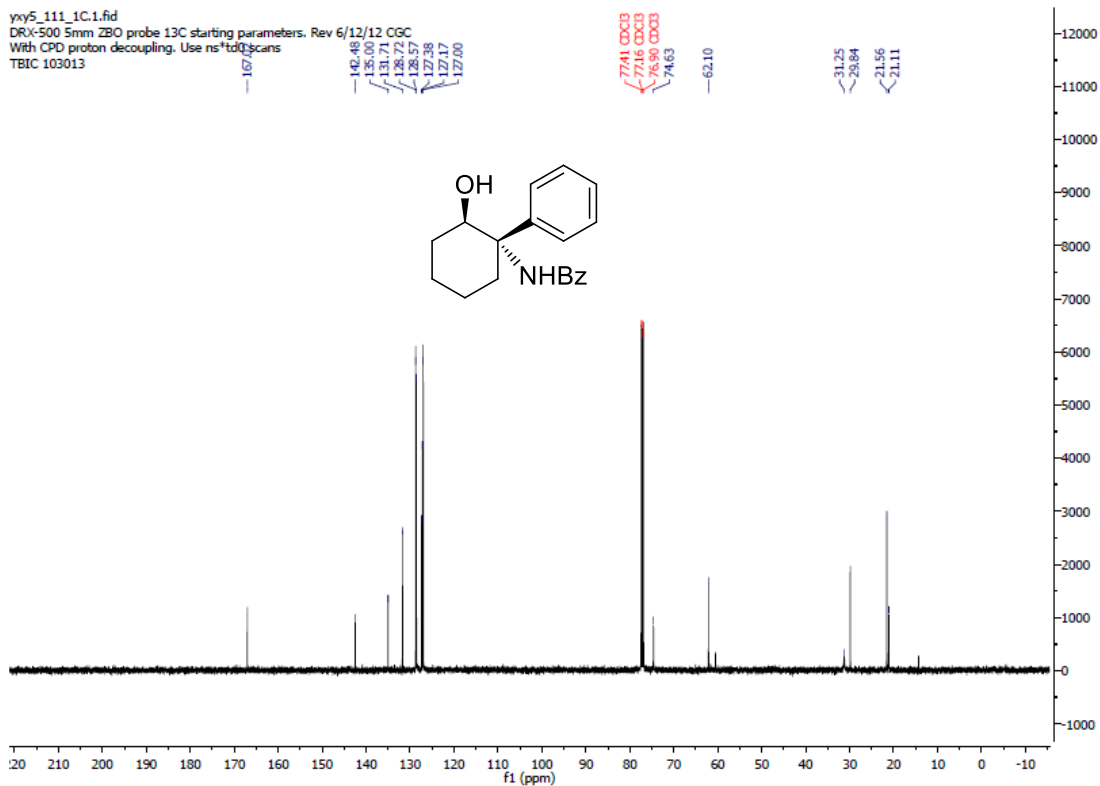

(E)-tert-butyl ((2-oxo-1-styrylcyclohexyl)(phenyl)methyl)carbamate (**5n**)

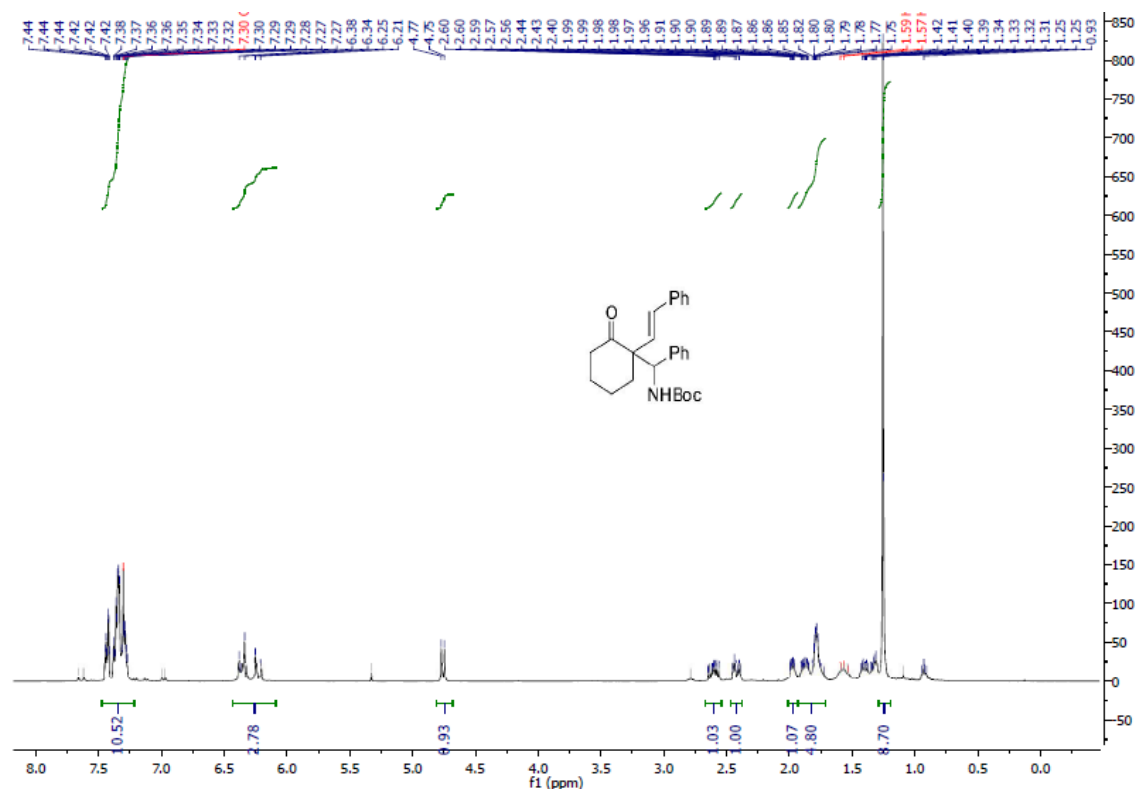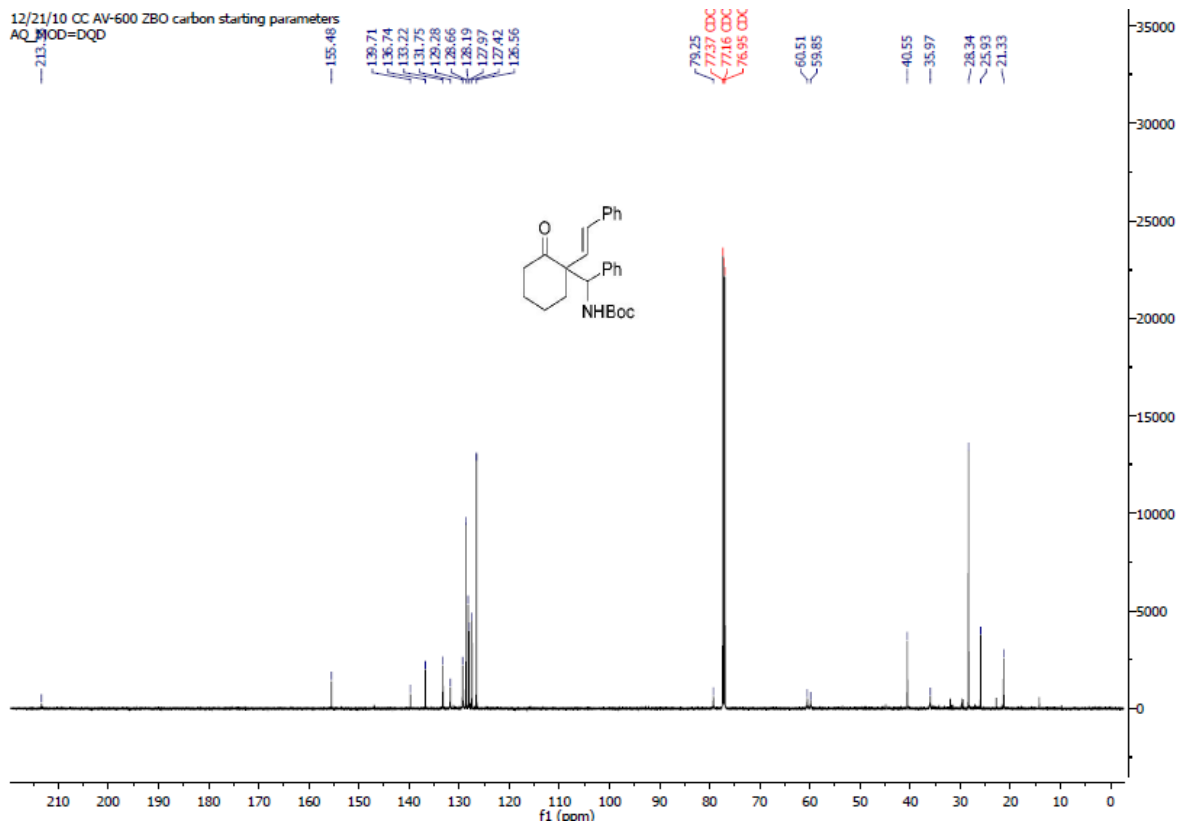

Supplement: NIHMS720093-supplement-Supporting_Information.pdf [file NIHMS720093-supplement-Supporting_Information.pdf]
